# Supplementary material for: Polyketides with α-glucosidase inhibitory and neuroprotective activities from Aspergillus versicolor associated with Pedicularis sylvatica
Source: Royal Society of Chemistry journal article supplement (doi:10.1039/d4ob00316k), 2024-01-01
Supplement: d4ob00316k1.pdf [file d4ob00316k1.pdf]

**Polyketides with  $\alpha$ -glucosidase inhibitory and neuroprotective activities from *Aspergillus versicolor* associated with *Pedicularis sylvatica***

Ting-Ting Jiang,<sup>‡a</sup> Liang-Liang Zhai,<sup>‡a</sup> Zi-Jue Wang,<sup>a</sup> Xin-Yu Wang,<sup>a</sup> Jian-Nan Li,<sup>a</sup> Yi-Jie Zhai,<sup>a</sup> Ding Li<sup>a</sup> and Wen-Bo Han<sup>\*a</sup>

a. Shaanxi Key Laboratory of Natural Products & Chemical Biology, College of Chemistry and Pharmacy, Northwest A&F University, Yangling, Shaanxi 712100, People's Republic of China

<sup>‡</sup>. These authors contributed equally to this work

\*Corresponding author

Prof. Dr. Wen-Bo Han. Tel.: +86-29-87092335; Fax: +86-29-87092226

E-mail: [wbhan@nwafu.edu.cn](mailto:wbhan@nwafu.edu.cn)

## Table of contents

- Figure S1.** The  $^1\text{H}$  NMR spectrum of **1** in  $\text{CDCl}_3$  (400 MHz)  
**Figure S2.** The  $^{13}\text{C}$  NMR spectrum of **1** in  $\text{CDCl}_3$  (100 MHz)  
**Figure S3.** The HSQC spectrum of **1** in  $\text{CDCl}_3$   
**Figure S4.** The  $^1\text{H}$ - $^1\text{H}$  COSY spectrum of **1** in  $\text{CDCl}_3$   
**Figure S5.** The HMBC spectrum of **1** in  $\text{CDCl}_3$   
**Figure S6.** The NOESY spectrum of **1** in  $\text{CDCl}_3$   
**Figure S7.** (+)-HRESIMS of compound **1**  
**Figure S8.** IR spectrum (film on KBr pellet) of compound **1**  
**Figure S9.** UV spectrum of compound **1** (MeOH)  
**Figure S10.** The  $^1\text{H}$  NMR spectrum of **2** in acetone- $d_6$  (400 MHz)  
**Figure S11.** The  $^{13}\text{C}$  NMR spectrum of **2** in acetone- $d_6$  (100 MHz)  
**Figure S12.** The HSQC spectrum of **2** in acetone- $d_6$   
**Figure S13.** The  $^1\text{H}$ - $^1\text{H}$  COSY spectrum of **2** in acetone- $d_6$   
**Figure S14.** The HMBC spectrum of **2** in acetone- $d_6$   
**Figure S15.** The NOESY spectrum of **2** in acetone- $d_6$   
**Figure S16.** (+)-HRESIMS of compound **2**  
**Figure S17.** IR spectrum (film on KBr pellet) of compound **2**  
**Figure S18.** UV spectrum of compound **2** (MeCN)  
**Figure S19.** The  $^1\text{H}$  NMR spectrum of **3** in  $\text{CDCl}_3$  (400 MHz)  
**Figure S20.** The  $^1\text{H}$  NMR spectrum of **4** in  $\text{CDCl}_3$  (400 MHz)  
**Figure S21.** The  $^1\text{H}$  NMR spectrum of **5** in acetone- $d_6$  (400 MHz)  
**Figure S22.** The  $^{13}\text{C}$  NMR spectrum of **5** in acetone- $d_6$  (100 MHz)  
**Figure S23.** The HSQC spectrum of **5** in acetone- $d_6$   
**Figure S24.** The  $^1\text{H}$ - $^1\text{H}$  COSY spectrum of **5** in acetone- $d_6$   
**Figure S25.** The HMBC spectrum of **5** in acetone- $d_6$   
**Figure S26.** The NOESY spectrum of **5** in acetone- $d_6$   
**Figure S27.** (+)-HRESIMS of compound **5**  
**Figure S28.** IR spectrum (film on KBr pellet) of compound **5**  
**Figure S29.** UV spectrum of compound **5** (MeOH)  
**Figure S30.** The  $^1\text{H}$  NMR spectrum of **6** in  $\text{CDCl}_3$  (400 MHz)  
**Figure S31.** The  $^{13}\text{C}$  NMR spectrum of **6** in  $\text{CDCl}_3$  (100 MHz)  
**Figure S32.** The HSQC spectrum of **6** in  $\text{CDCl}_3$   
**Figure S33.** The  $^1\text{H}$ - $^1\text{H}$  COSY spectrum of **6** in  $\text{CDCl}_3$   
**Figure S34.** The HMBC spectrum of **6** in  $\text{CDCl}_3$   
**Figure S35.** The NOESY spectrum of **6** in  $\text{CDCl}_3$   
**Figure S36.** (+)-HRESIMS of compound **6**  
**Figure S37.** IR spectrum (film on KBr pellet) of compound **6**  
**Figure S38.** UV spectrum of compound **6** (MeCN)  
**Figure S39.** The  $^1\text{H}$  NMR spectrum of **7** in  $\text{CDCl}_3$  (400 MHz)  
**Figure S40.** The  $^1\text{H}$  NMR spectrum of **8** in  $\text{CDCl}_3$  (400 MHz)  
**Table S1.** Conformational analysis of the B3LYP/6-31G(d) optimized conformers of cpd-1A in the gas phase (T=298.15 K)

**Table S2.** Atomic coordinates (Å) of cpd-1A-1 obtained at the B3LYP/6-31G(d) level of theory in the gas phase.

**Table S3.** Atomic coordinates (Å) of cpd-1A-2 obtained at the B3LYP/6-31G(d) level of theory in the gas phase.

**Table S4.** Atomic coordinates (Å) of cpd-1A-3 obtained at the B3LYP/6-31G(d) level of theory in the gas phase.

**Table S5.** Atomic coordinates (Å) of cpd-1A-4 obtained at the B3LYP/6-31G(d) level of theory in the gas phase.

**Table S6.** Atomic coordinates (Å) of cpd-1A-5 obtained at the B3LYP/6-31G(d) level of theory in the gas phase.

**Table S7.** Atomic coordinates (Å) of cpd-1A-6 obtained at the B3LYP/6-31G(d) level of theory in the gas phase.

**Table S8.** Atomic coordinates (Å) of cpd-1A-7 obtained at the B3LYP/6-31G(d) level of theory in the gas phase.

**Table S9.** Atomic coordinates (Å) of cpd-1A-8 obtained at the B3LYP/6-31G(d) level of theory in the gas phase.

**Table S10.** Key transitions, oscillator strengths, and rotatory strengths in the ECD spectrum of conformer cpd-1A-1 at the CAM-B3LYP/Def2SVP level of theory in MeOH with IEFPCM solvent model.

**Table S11.** Key transitions, oscillator strengths, and rotatory strengths in the ECD spectrum of conformer cpd-1A-2 at the CAM-B3LYP/Def2SVP level of theory in MeOH with IEFPCM solvent model.

**Table S12.** Key transitions, oscillator strengths, and rotatory strengths in the ECD spectrum of conformer cpd-1A-3 at the CAM-B3LYP/Def2SVP level of theory in MeOH with IEFPCM solvent model.

**Table S13.** Key transitions, oscillator strengths, and rotatory strengths in the ECD spectrum of conformer cpd-1A-4 at the CAM-B3LYP/Def2SVP level of theory in MeOH with IEFPCM solvent model.

**Table S14.** Key transitions, oscillator strengths, and rotatory strengths in the ECD spectrum of conformer cpd-1A-5 at the CAM-B3LYP/Def2SVP level of theory in MeOH with IEFPCM solvent model.

**Table S15.** Key transitions, oscillator strengths, and rotatory strengths in the ECD spectrum of conformer cpd-1A-6 at the CAM-B3LYP/Def2SVP level of theory in MeOH with IEFPCM solvent model.

**Table S16.** Key transitions, oscillator strengths, and rotatory strengths in the ECD spectrum of conformer cpd-1A-7 at the CAM-B3LYP/Def2SVP level of theory in MeOH with IEFPCM solvent model.

**Table S17.** Key transitions, oscillator strengths, and rotatory strengths in the ECD spectrum of conformer cpd-1A-8 at the CAM-B3LYP/Def2SVP level of theory in MeOH with IEFPCM solvent model.

**Table S18.** Experimental and calculated  $^{13}\text{C}$ -NMR chemical shifts of cpd-2A

**Table S19.** Experimental and calculated  $^1\text{H}$ -NMR chemical shifts of cpd-2A

**Table S20.** Conformational analysis of the B3LYP/6-31G(d) optimized conformers of cpd-2A in the gas phase (T=298.15 K)

**Table S21.** Atomic coordinates (Å) of cpd-2A-1 obtained at the B3LYP/6-31G(d) level of theory in the gas phase.

**Table S22.** Atomic coordinates (Å) of cpd-2A-2 obtained at the B3LYP/6-31G(d) level of theory in the gas phase.

**Table S23.** Atomic coordinates (Å) of cpd-2A-3 obtained at the B3LYP/6-31G(d) level of theory in the gas phase.

**Table S24.** Atomic coordinates (Å) of cpd-2A-4 obtained at the B3LYP/6-31G(d) level of theory in the gas phase.

**Table S25.** Atomic coordinates (Å) of cpd-2A-5 obtained at the B3LYP/6-31G(d) level of theory in the gas phase.

**Table S26.** Atomic coordinates (Å) of cpd-2A-6 obtained at the B3LYP/6-31G(d) level of theory in the gas phase.

**Table S27.** Atomic coordinates (Å) of cpd-2A-7 obtained at the B3LYP/6-31G(d) level of theory in the gas phase.

**Table S28.** Key transitions, oscillator strengths, and rotatory strengths in the ECD spectrum of conformer cpd-2A-1 at the Cam-B3LYP/Def2SVP level of theory in acetonitrile with IEFPCM solvent model.

**Table S29.** Key transitions, oscillator strengths, and rotatory strengths in the ECD spectrum of conformer cpd-2A-2 at the Cam-B3LYP/Def2SVP level of theory in acetonitrile with IEFPCM solvent model.

**Table S30.** Key transitions, oscillator strengths, and rotatory strengths in the ECD spectrum of conformer cpd-2A-3 at the Cam-B3LYP/Def2SVP level of theory in acetonitrile with IEFPCM solvent model.

**Table S31.** Key transitions, oscillator strengths, and rotatory strengths in the ECD spectrum of conformer cpd-2A-4 at the Cam-B3LYP/Def2SVP level of theory in acetonitrile with IEFPCM solvent model.

**Table S32.** Key transitions, oscillator strengths, and rotatory strengths in the ECD spectrum of conformer cpd-2A-5 at the Cam-B3LYP/Def2SVP level of theory in acetonitrile with IEFPCM solvent model.

**Table S33.** Key transitions, oscillator strengths, and rotatory strengths in the ECD spectrum of conformer cpd-2A-6 at the Cam-B3LYP/Def2SVP level of theory in acetonitrile with IEFPCM solvent model.

**Table S34.** Key transitions, oscillator strengths, and rotatory strengths in the ECD spectrum of conformer cpd-2A-7 at the Cam-B3LYP/Def2SVP level of theory in acetonitrile with IEFPCM solvent model.

**Table S35.** Experimental and calculated <sup>13</sup>C-NMR chemical shifts of cpd-6A

**Table S36.** Experimental and calculated <sup>1</sup>H-NMR chemical shifts of cpd-6A

**Table S37.** Conformational analysis of the B3LYP/6-31G(d) optimized conformers of cpd-6A in the gas phase (T=298.15 K)

**Table S38.** Atomic coordinates (Å) of cpd-6A-1 obtained at the B3LYP/6-31G(d) level of theory in the gas phase.

**Table S39.** Atomic coordinates (Å) of cpd-6A-2 obtained at the B3LYP/6-31G(d) level of theory in the gas phase.

**Table S40.** Atomic coordinates (Å) of cpd-6A-3 obtained at the B3LYP/6-31G(d) level

of theory in the gas phase.

**Table S41.** Atomic coordinates ( $\text{\AA}$ ) of cpd-6A-4 obtained at the B3LYP/6-31G(d) level of theory in the gas phase.

**Table S42.** Atomic coordinates ( $\text{\AA}$ ) of cpd-6A-5 obtained at the B3LYP/6-31G(d) level of theory in the gas phase.

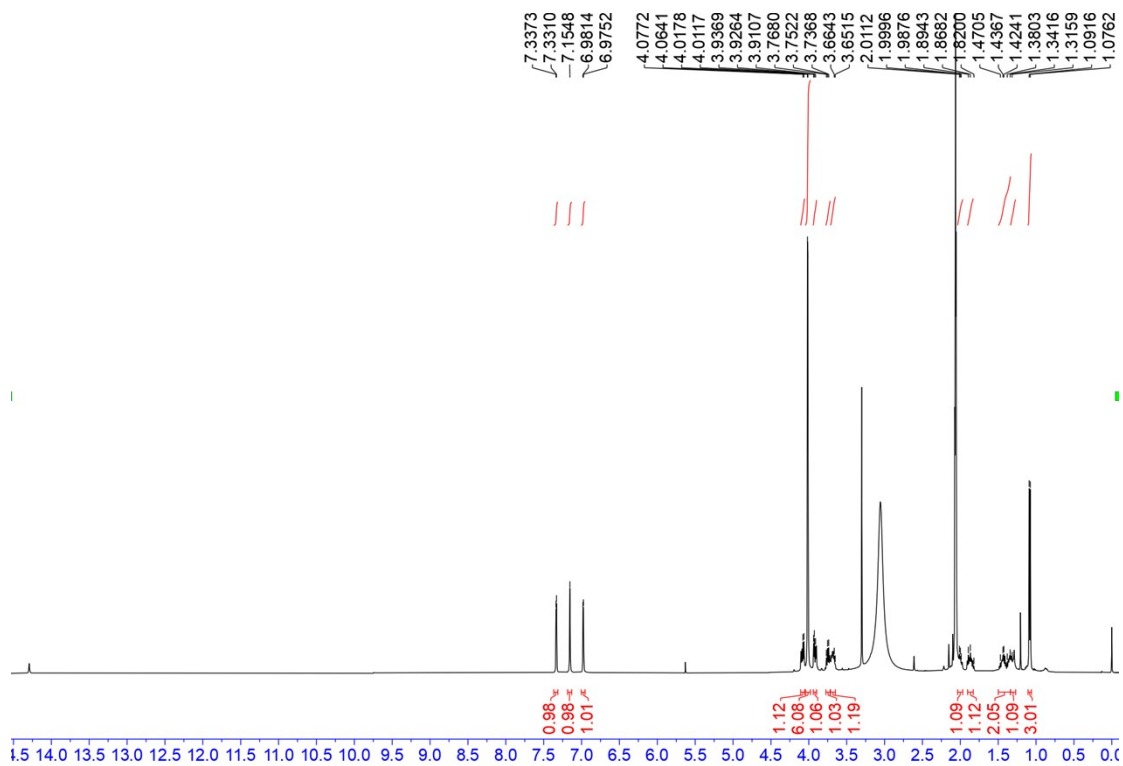

**Figure S1.** The  $^1\text{H}$  NMR spectrum of **1** in  $\text{CDCl}_3$  (400 MHz).

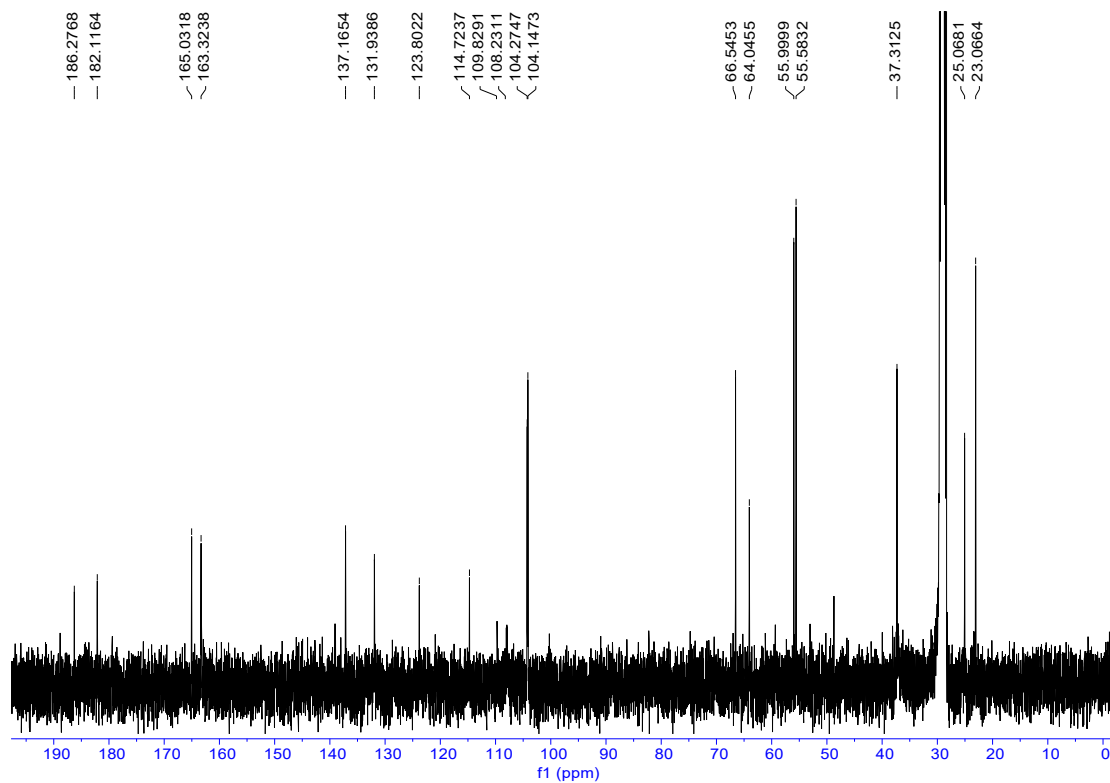

**Figure S2.** The  $^{13}\text{C}$  NMR spectrum of **1** in  $\text{CDCl}_3$  (100 MHz).

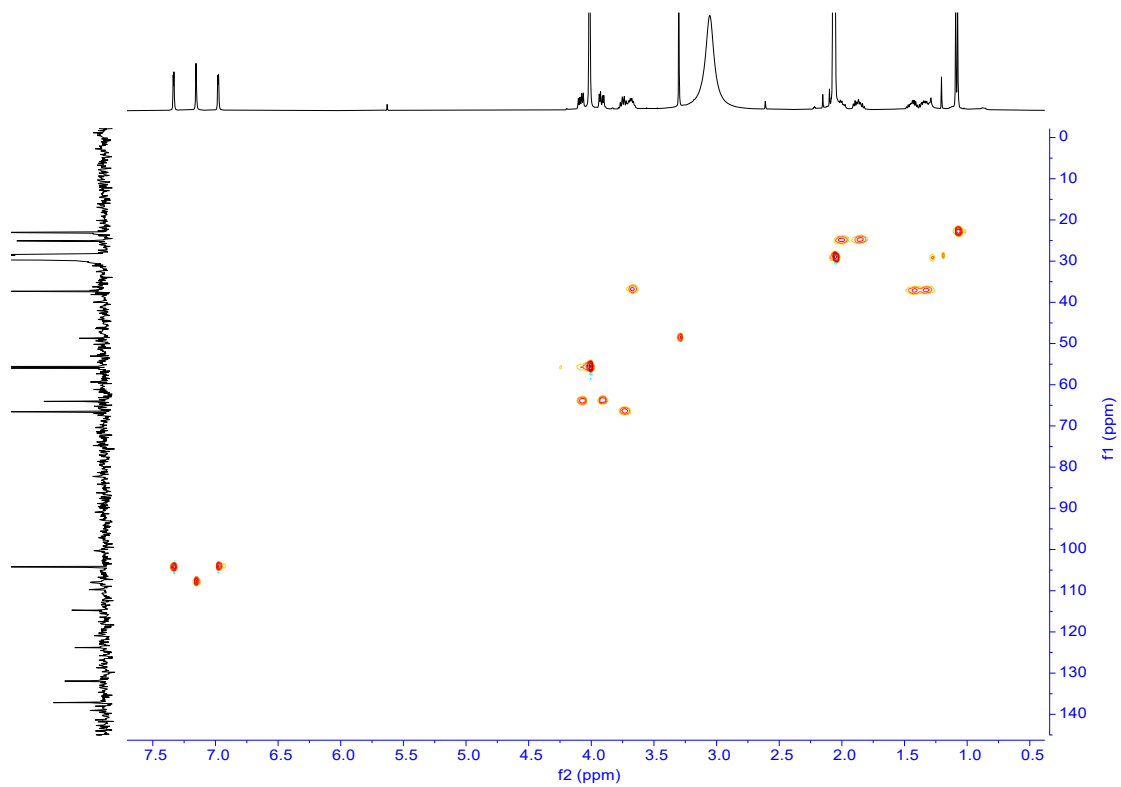

**Figure S3.** The HSQC spectrum of **1** in  $\text{CDCl}_3$ .

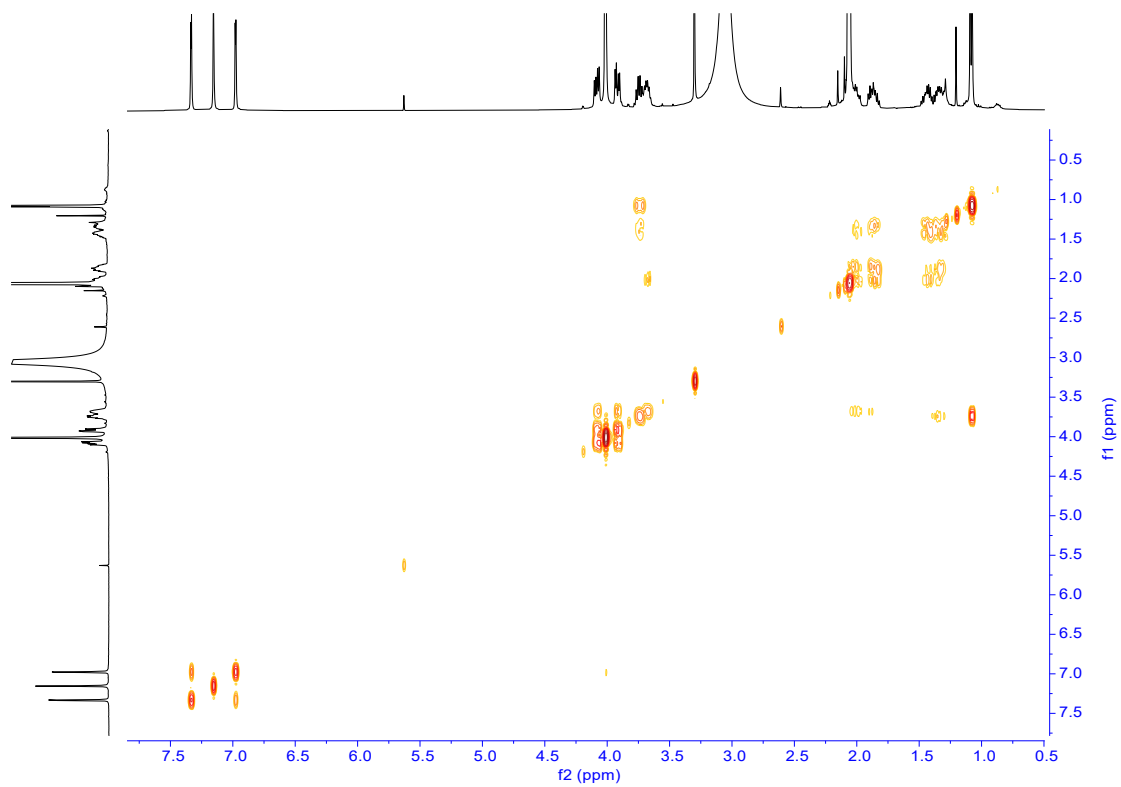

**Figure S4.** The  $^1\text{H}$ - $^1\text{H}$  COSY spectrum of **1** in  $\text{CDCl}_3$ .

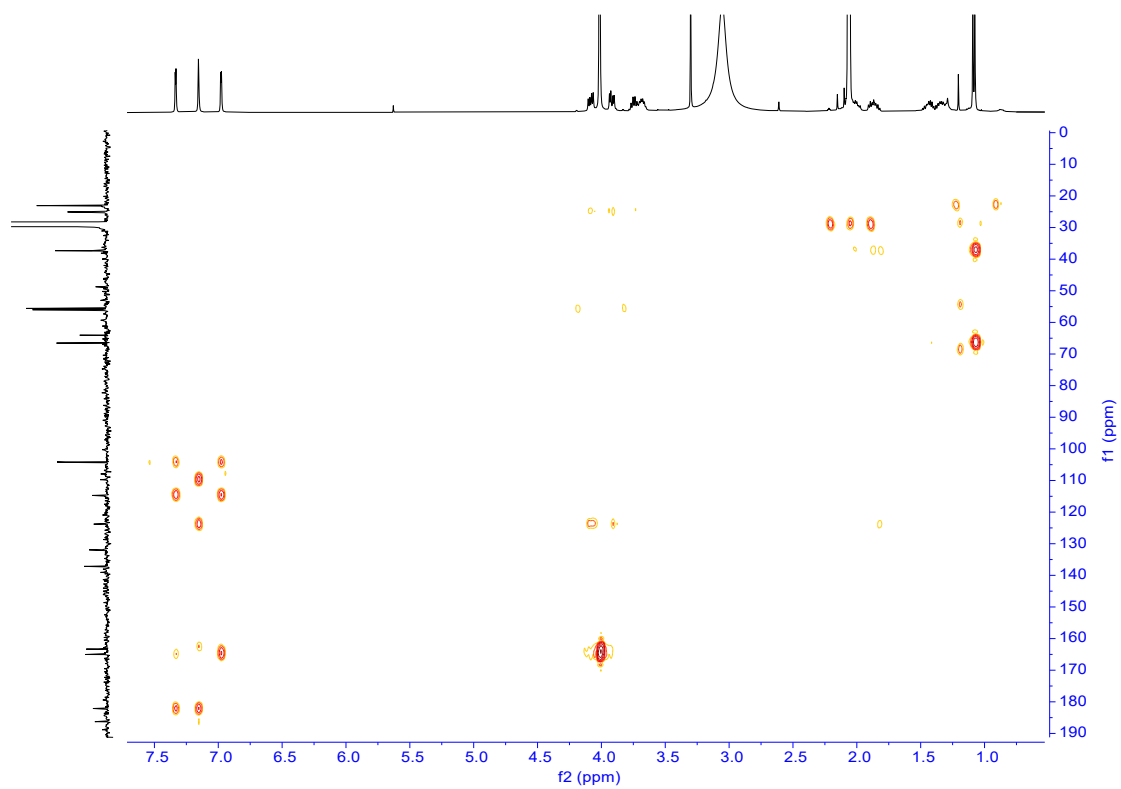

**Figure S5.** The HMBC spectrum of **1** in  $\text{CDCl}_3$ .

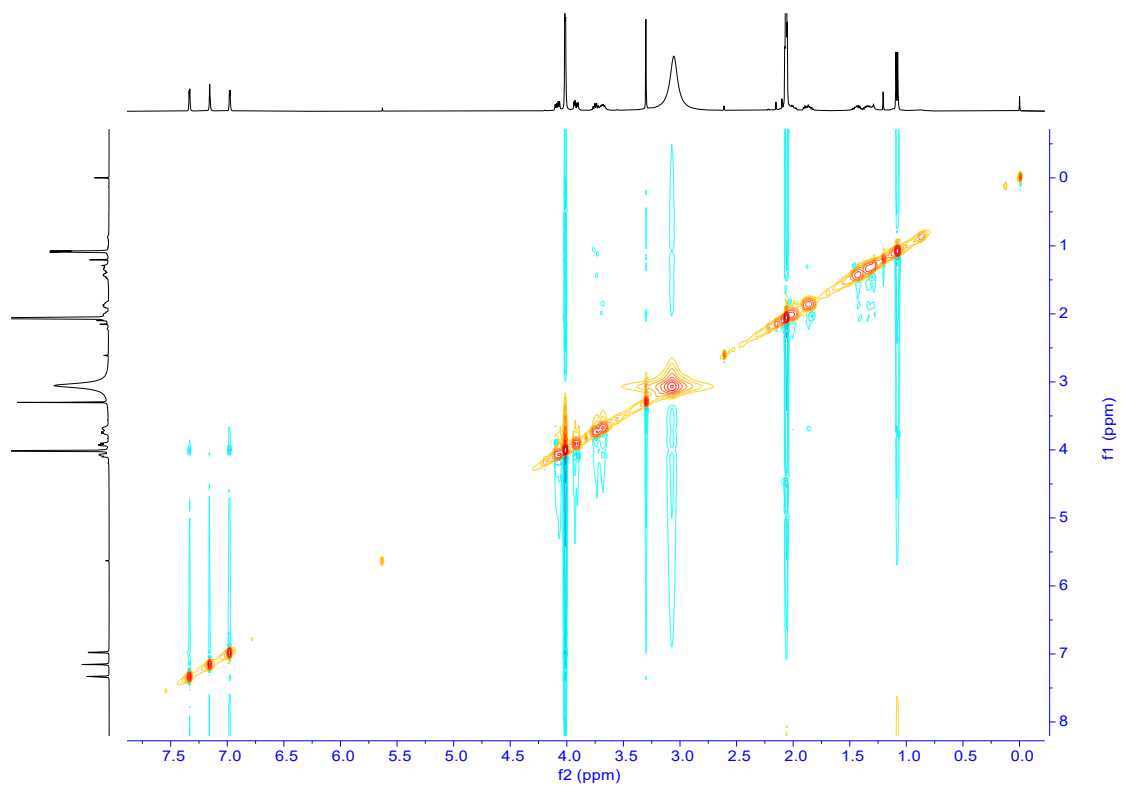

**Figure S6.** The NOESY spectrum of **1** in  $\text{CDCl}_3$ .



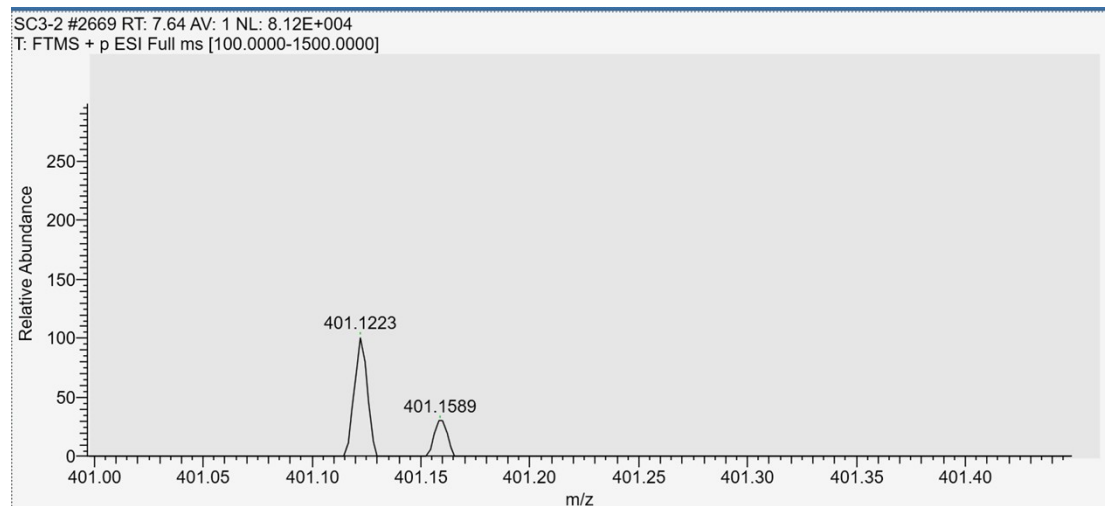

**Figure S7.** (+)-HRESIMS of compound **1**

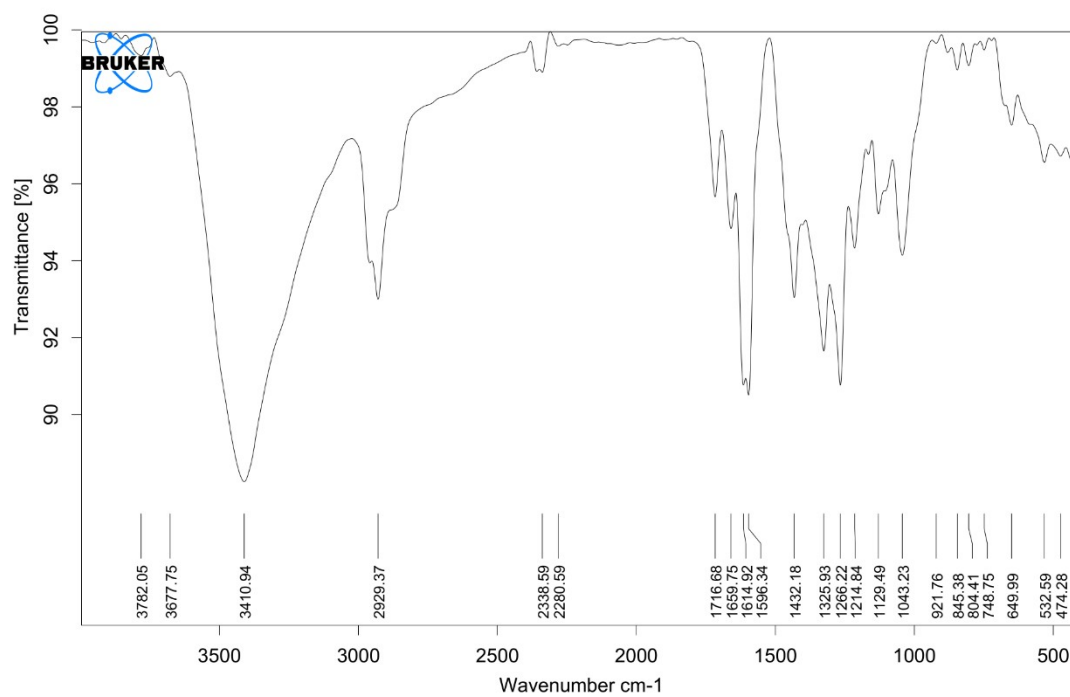

**Figure S8.** IR spectrum (film on KBr pellet) of compound **1**

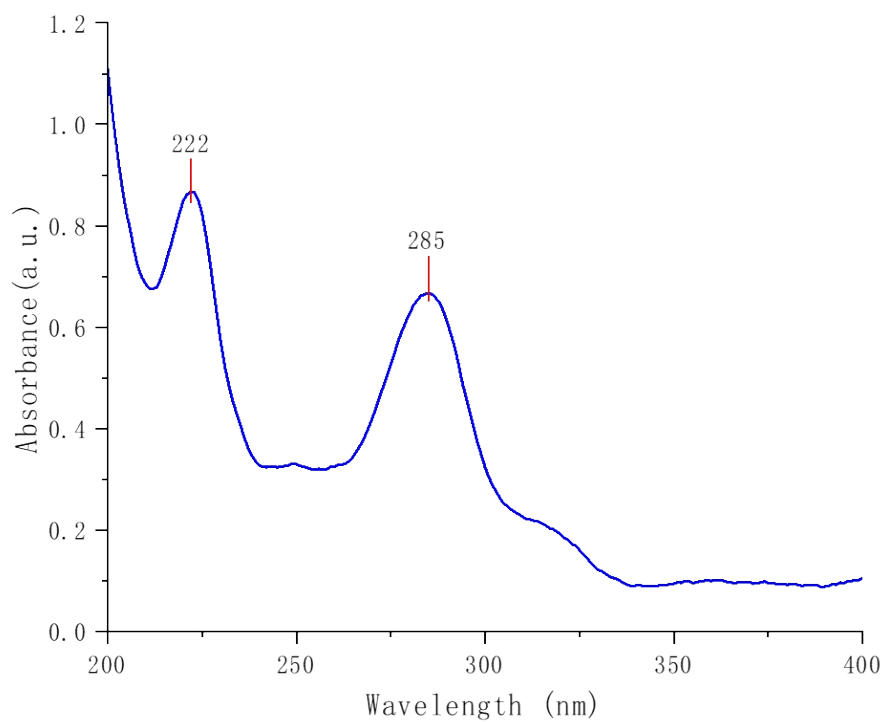

**Figure S9.** UV spectrum of compound **1** (MeOH)

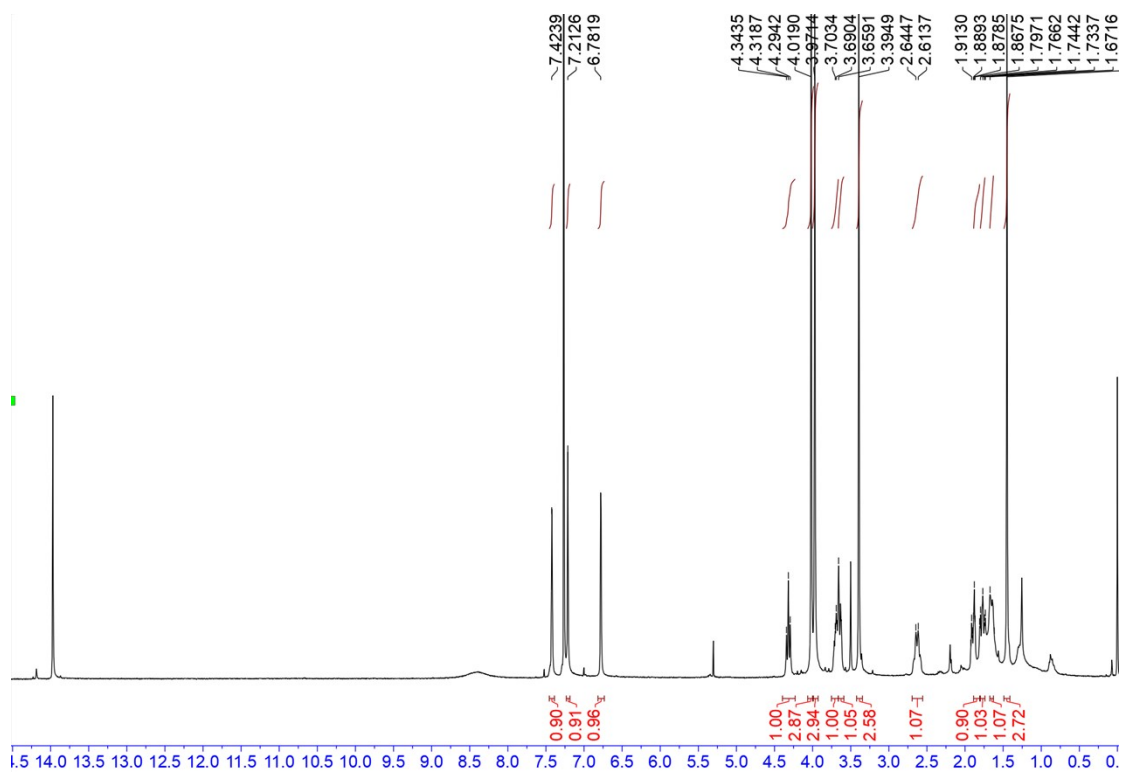

**Figure S10.** The  $^1\text{H}$  NMR spectrum of **2** in acetone- $d_6$  (400 MHz).

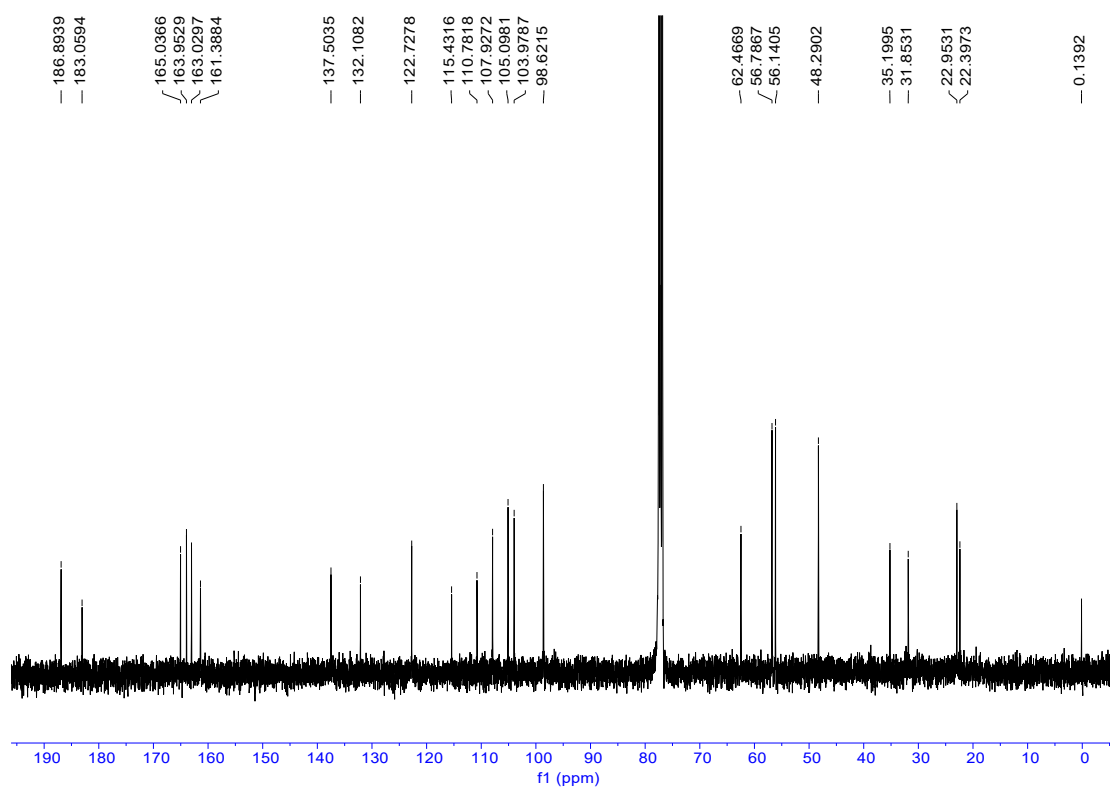

Figure S11. The  $^{13}\text{C}$  NMR spectrum of **2** in acetone- $d_6$  (100 MHz).

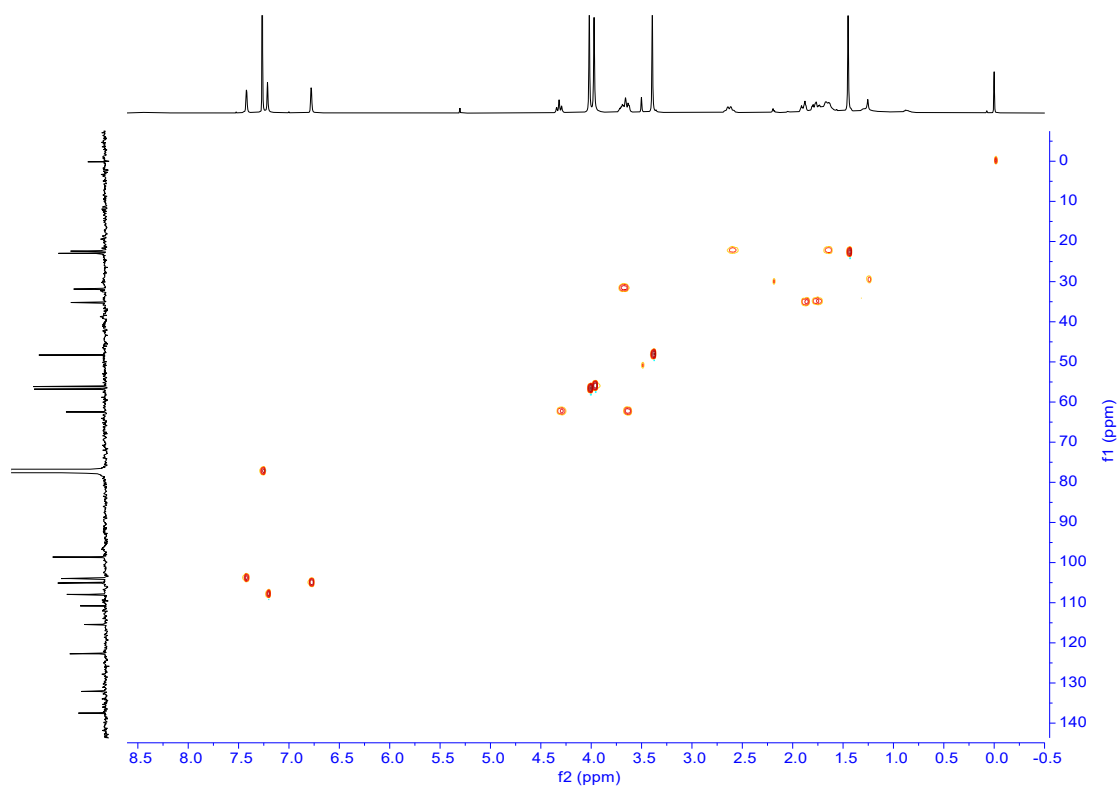

Figure S12. The HSQC spectrum of **2** in acetone- $d_6$ .

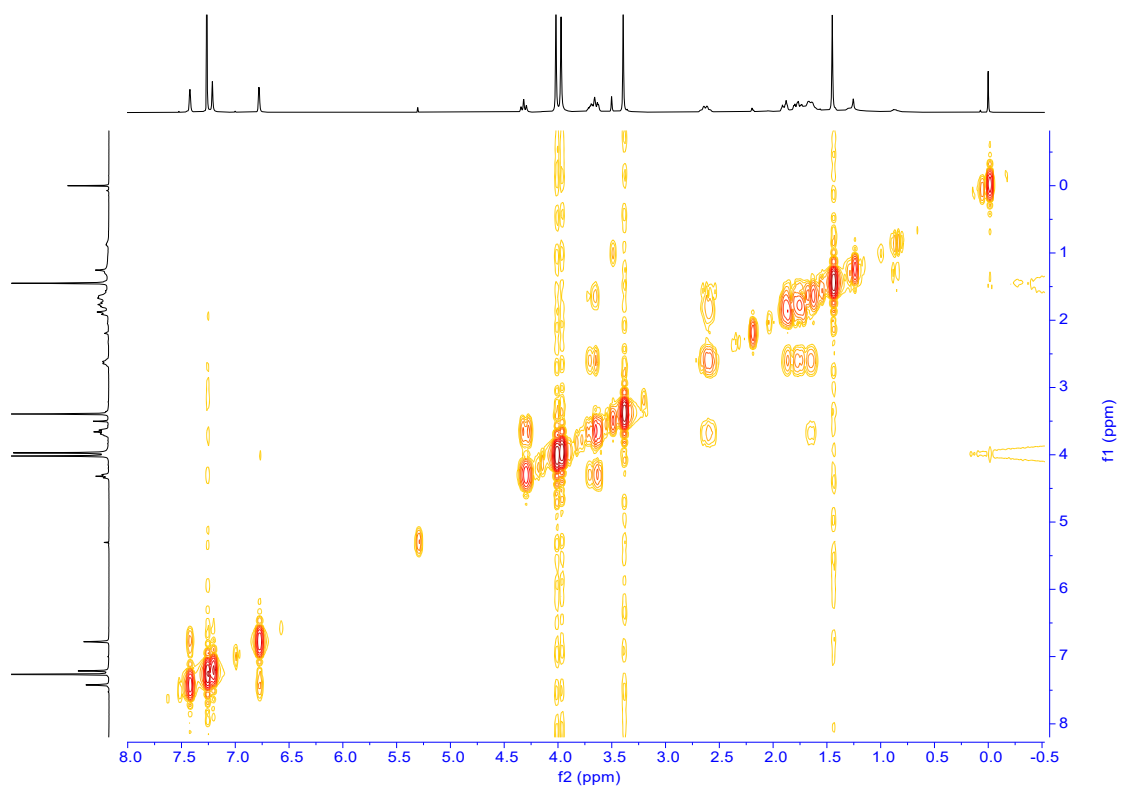

**Figure S13.** The  $^1\text{H}$ - $^1\text{H}$  COSY spectrum of **2** in acetone- $d_6$ .

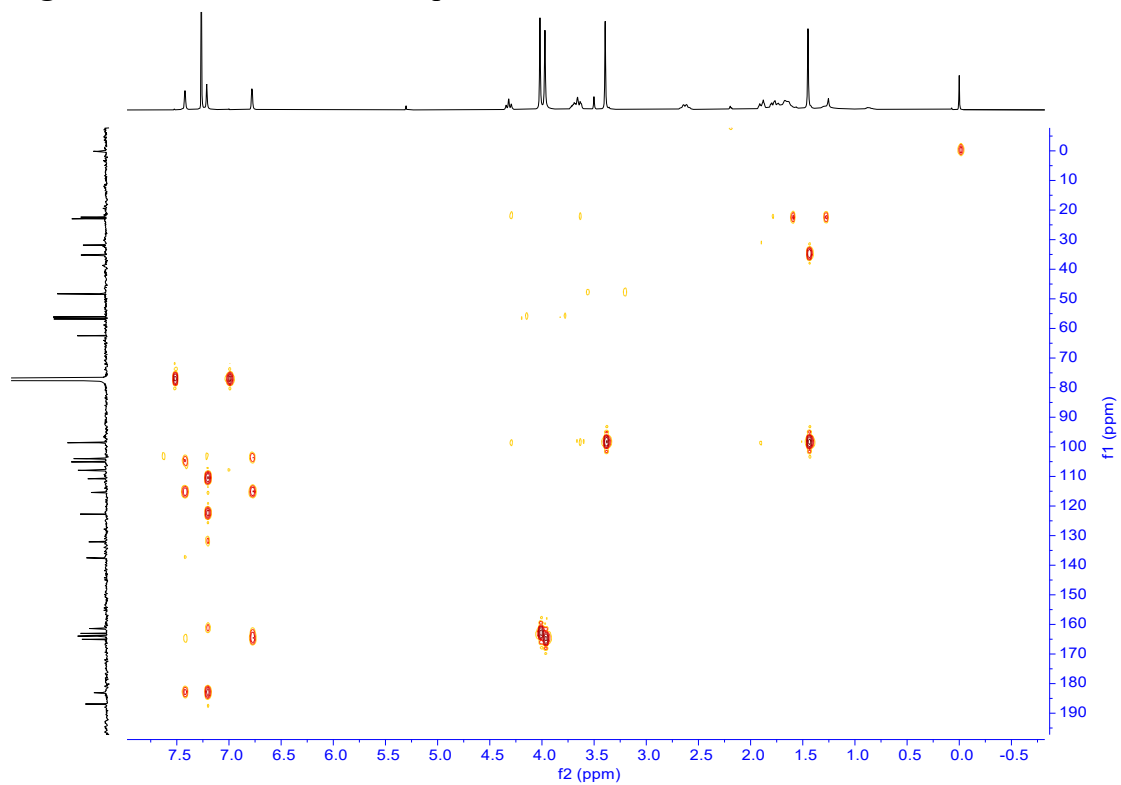

**Figure S14.** The HMBC spectrum of **2** in acetone- $d_6$ .

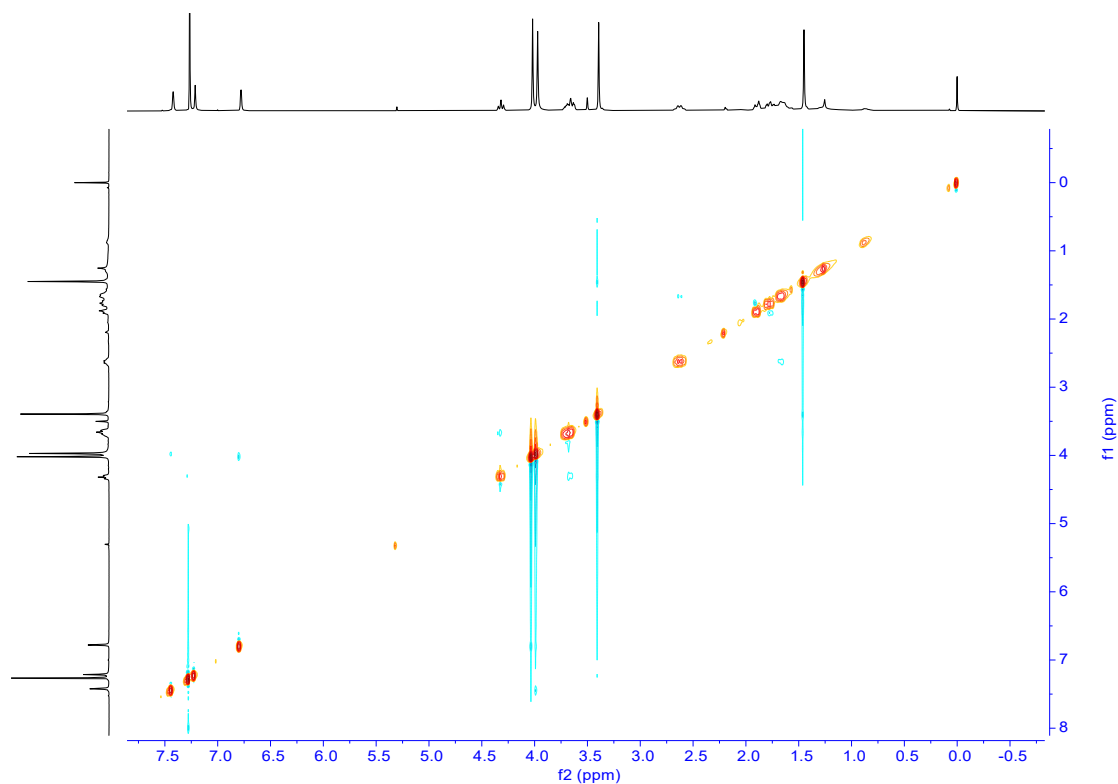

**Figure S15.** The NOESY spectrum of **2** in acetone- $d_6$ .

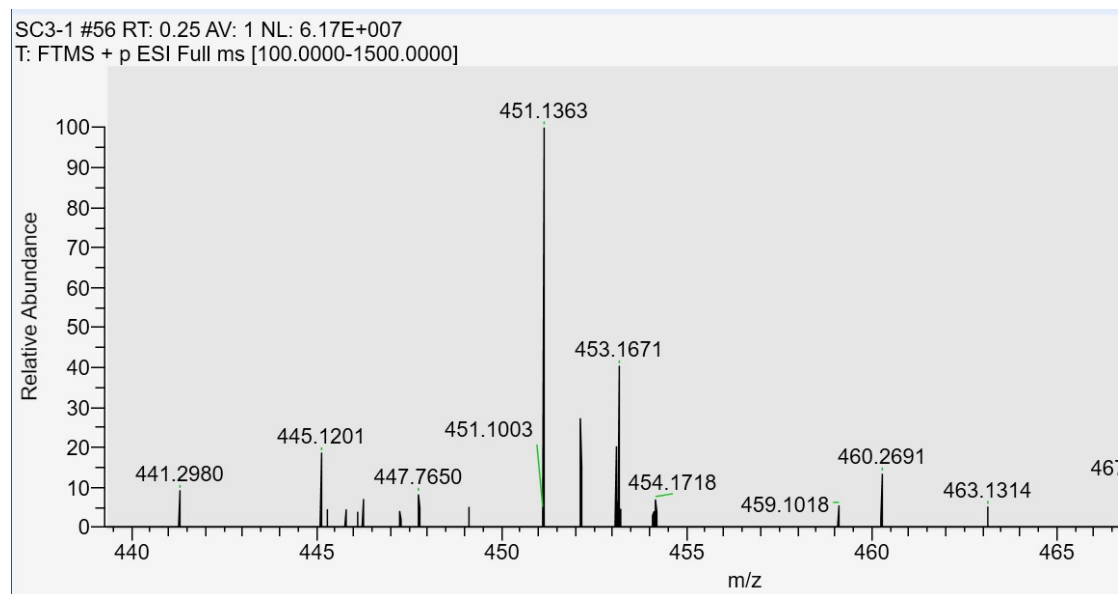

**Figure S16.** (+)-HRESIMS of compound **2**

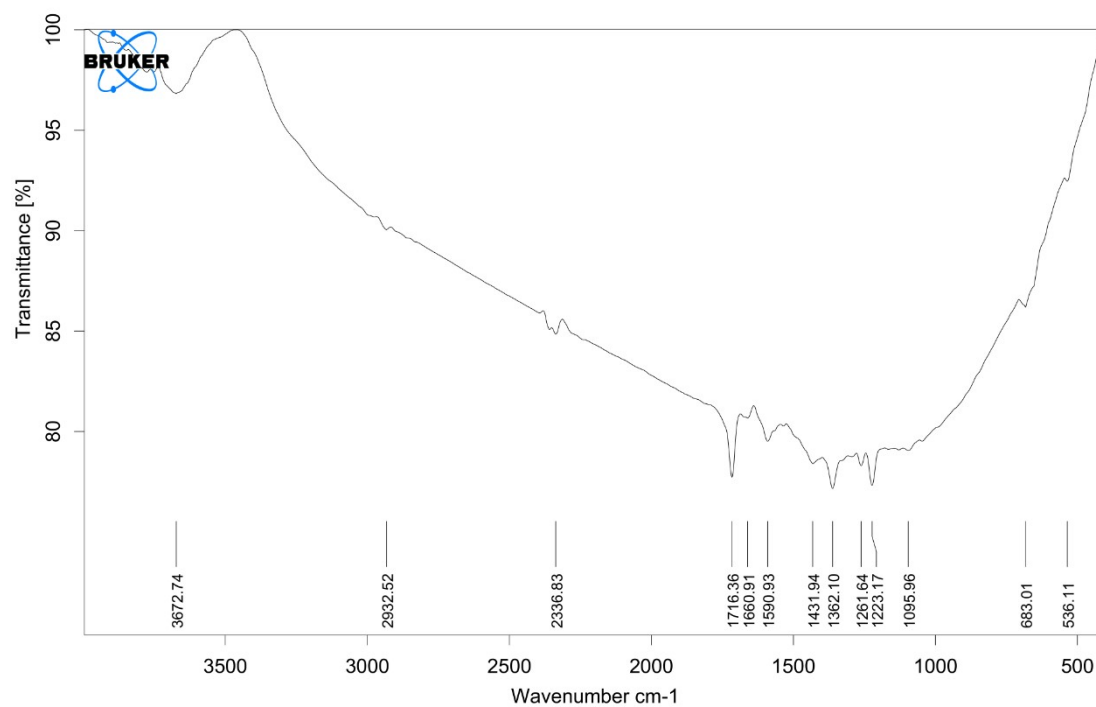

**Figure S17.** IR spectrum (film on KBr pellet) of compound **2**

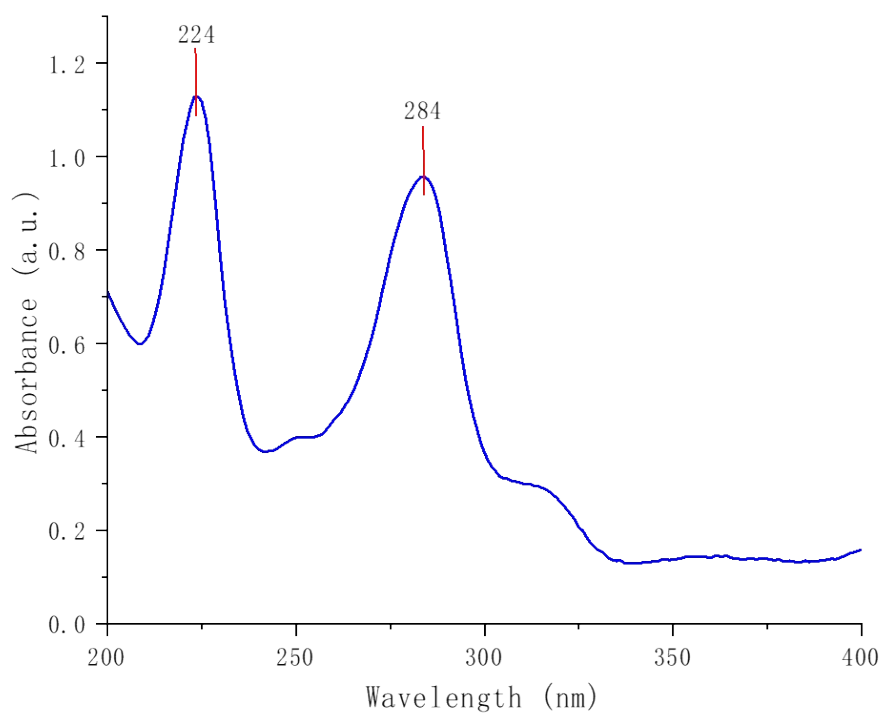

**Figure S18.** UV spectrum of compound **2** (MeCN)

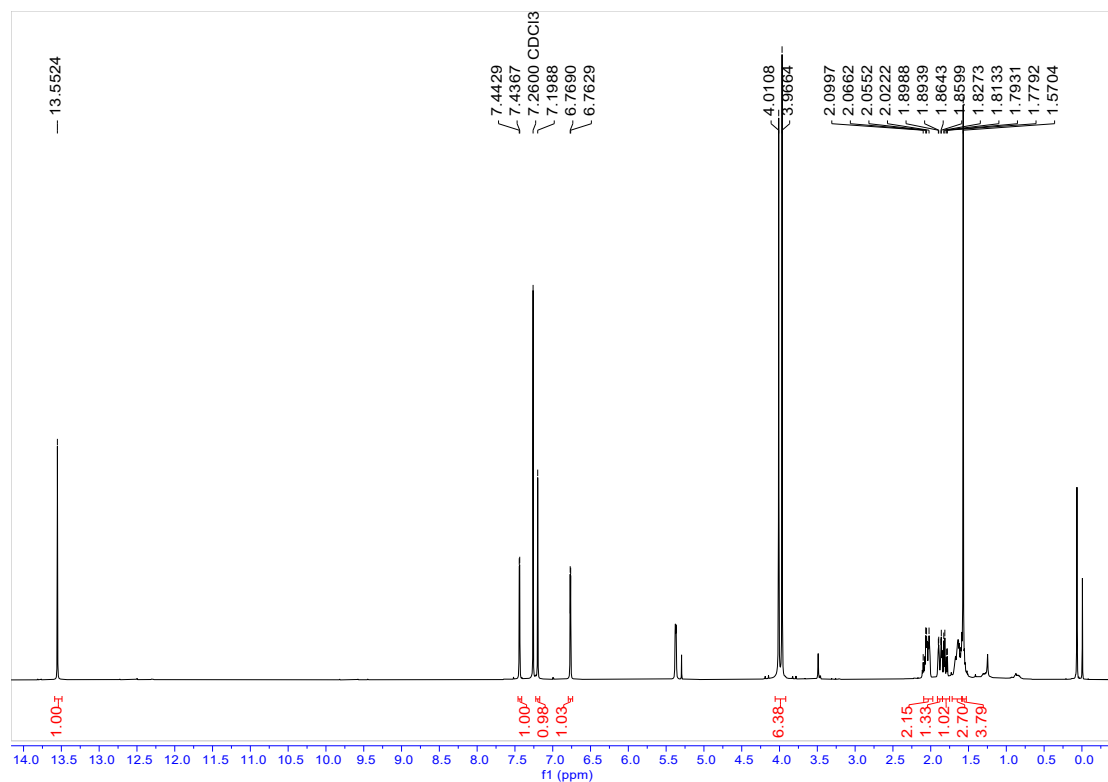

Figure S19. The  $^1\text{H}$  NMR spectrum of **3** in  $\text{CDCl}_3$  (400 MHz).

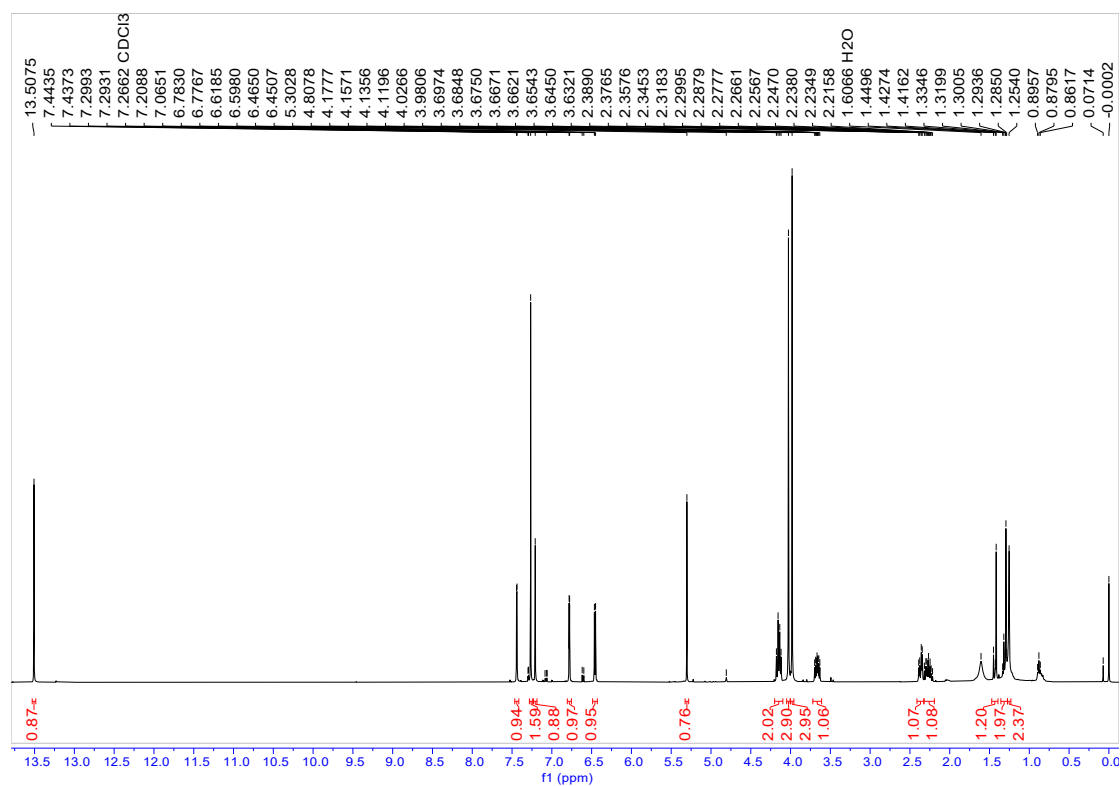

Figure S20. The  $^1\text{H}$  NMR spectrum of **4** in  $\text{CDCl}_3$  (400 MHz).

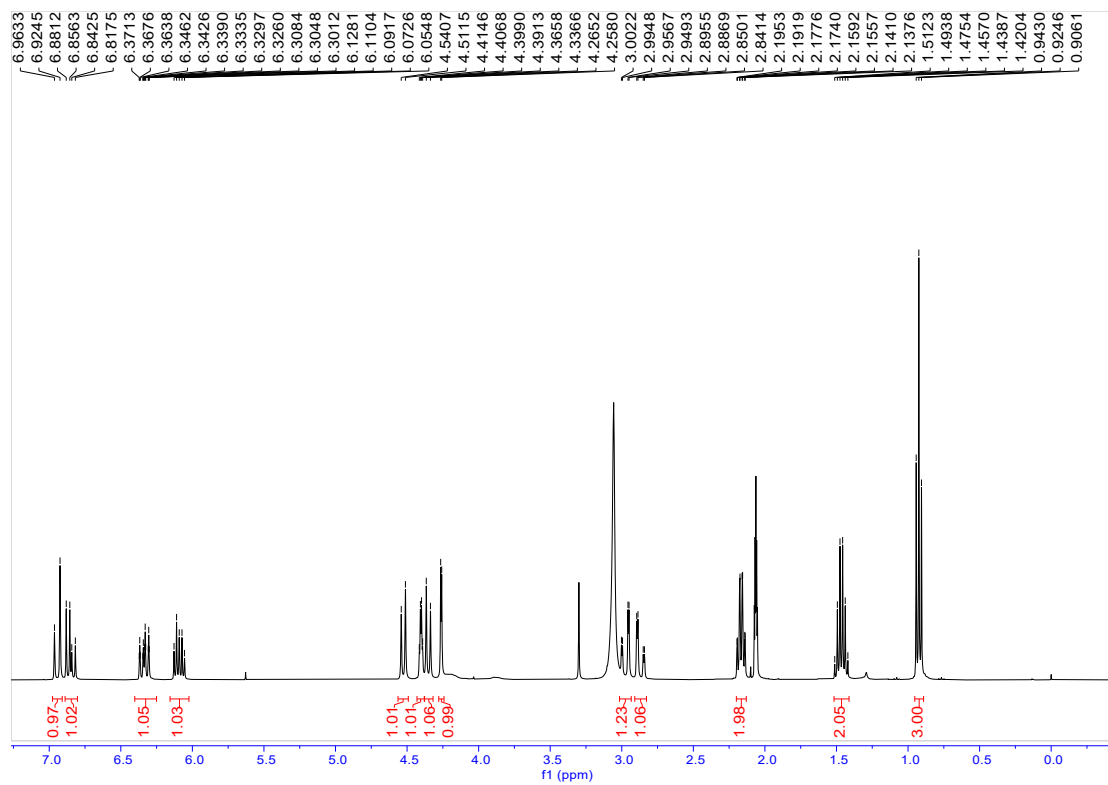

Figure S21. The  $^1\text{H}$  NMR spectrum of **5** in acetone- $d_6$  (400 MHz).

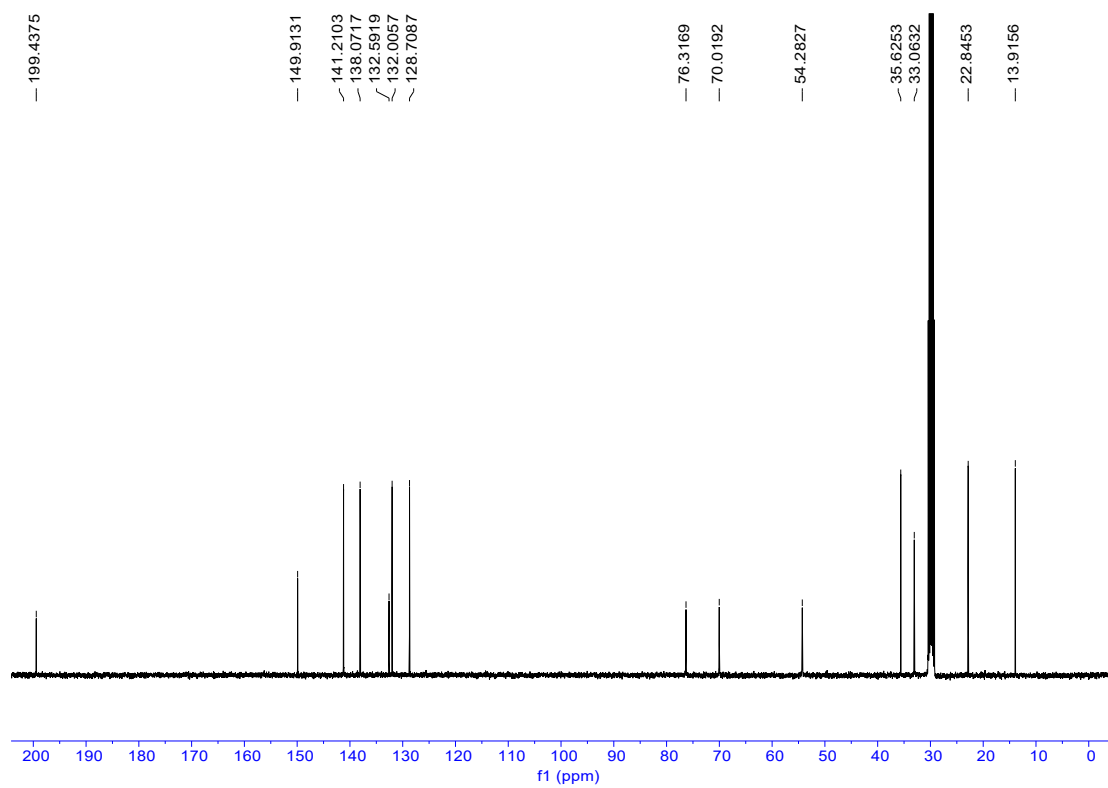

Figure S22. The  $^{13}\text{C}$  NMR spectrum of **5** in acetone- $d_6$  (100 MHz).



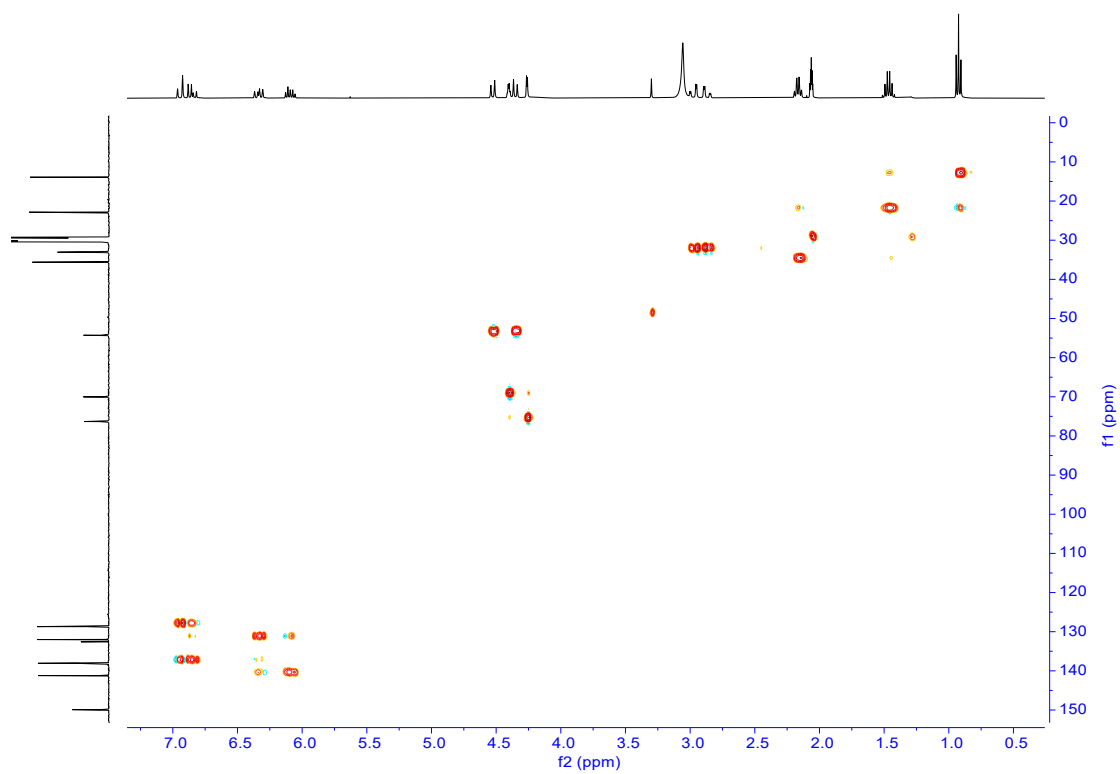

**Figure S23.** The HSQC spectrum of **5** in acetone- $d_6$ .

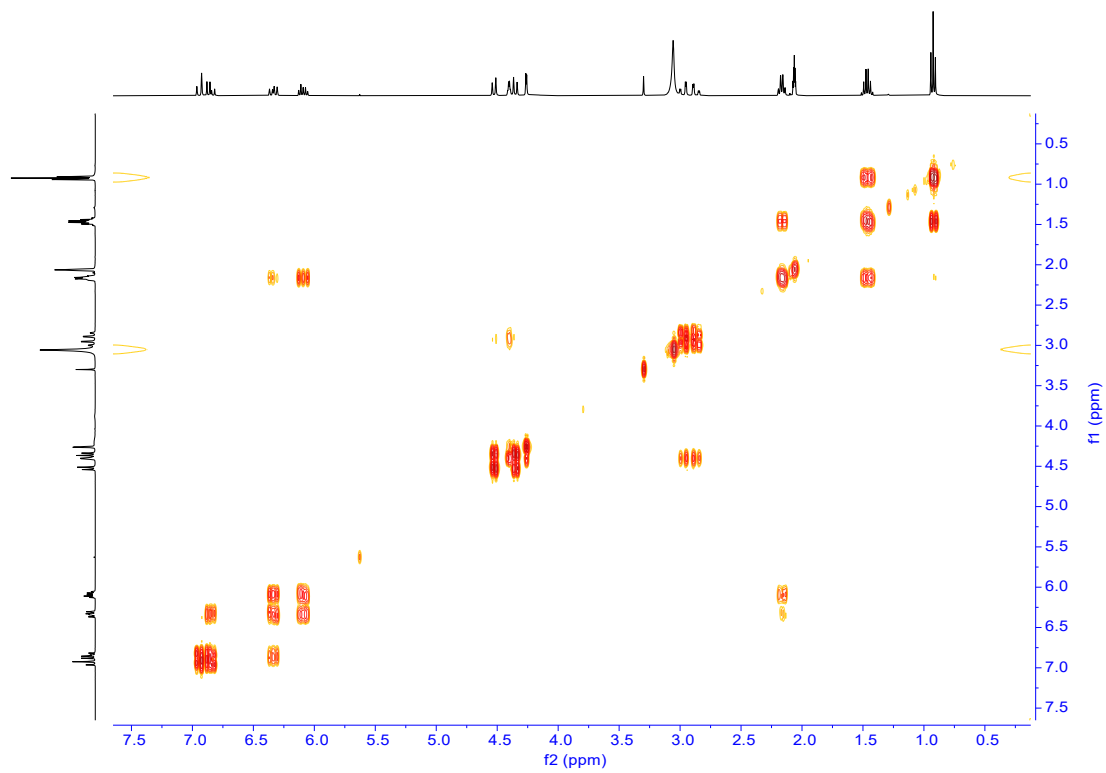

**Figure S24.** The  $^1\text{H}$ - $^1\text{H}$  COSY spectrum of **5** in acetone- $d_6$ .

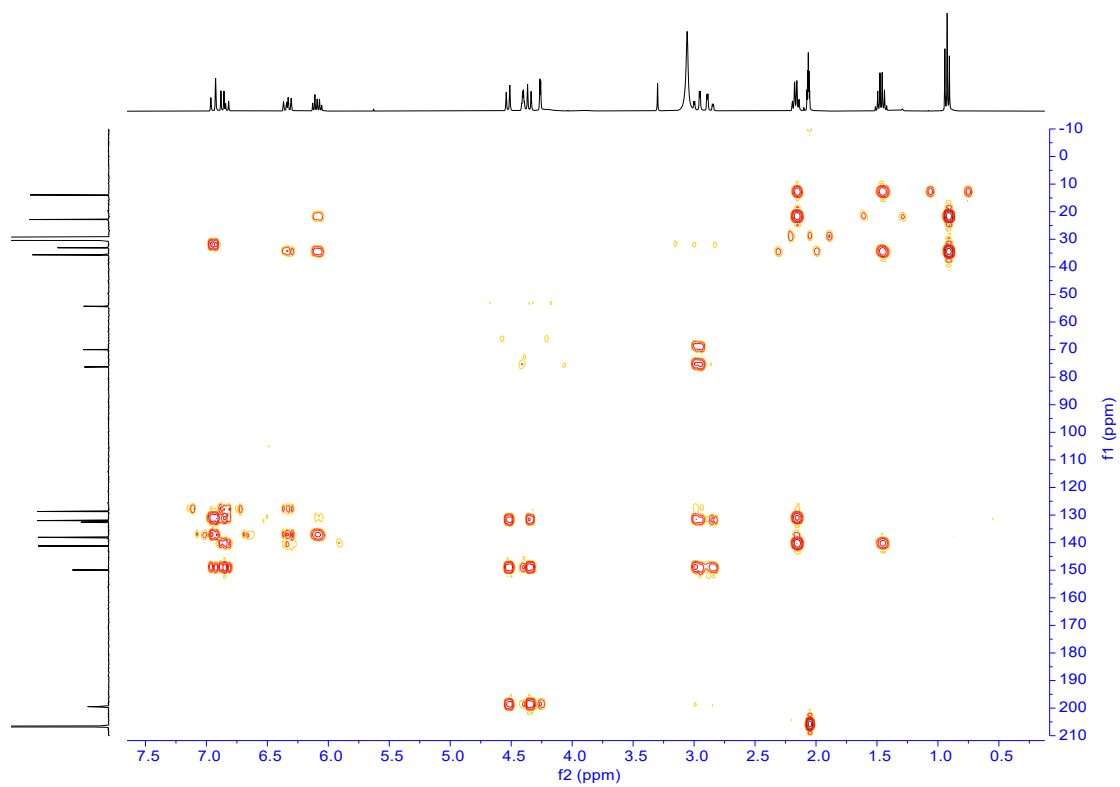

**Figure S25.** The HMBC spectrum of **5** in acetone- $d_6$ .

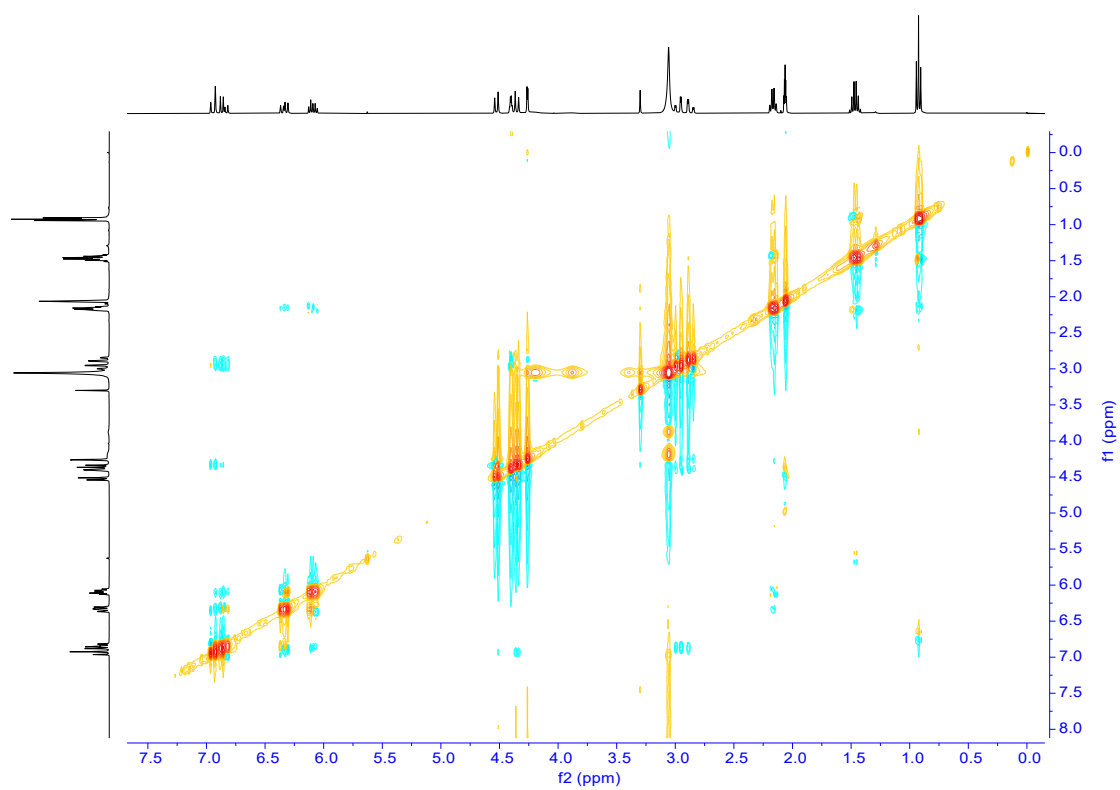

**Figure S26.** The NOESY spectrum of **5** in acetone- $d_6$ .

SC3-5 #2909 RT: 8.34 AV: 1 NL: 7.17E+005  
T: FTMS + p ESI Full ms [100.0000-1500.0000]

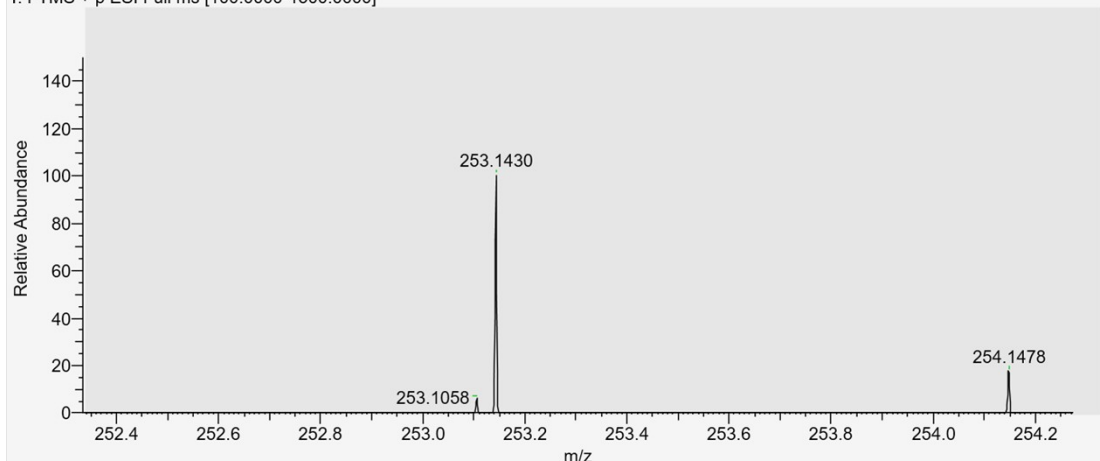

**Figure S27.** (+)-HRESIMS of compound **5**

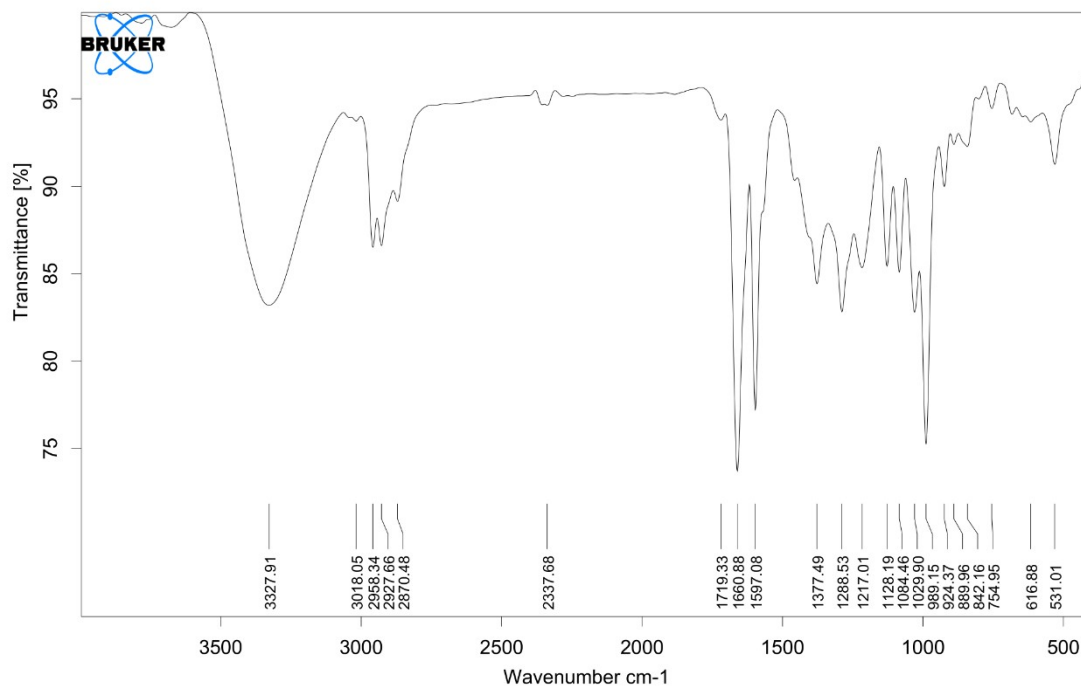

**Figure S28.** IR spectrum (film on KBr pellet) of compound **5**

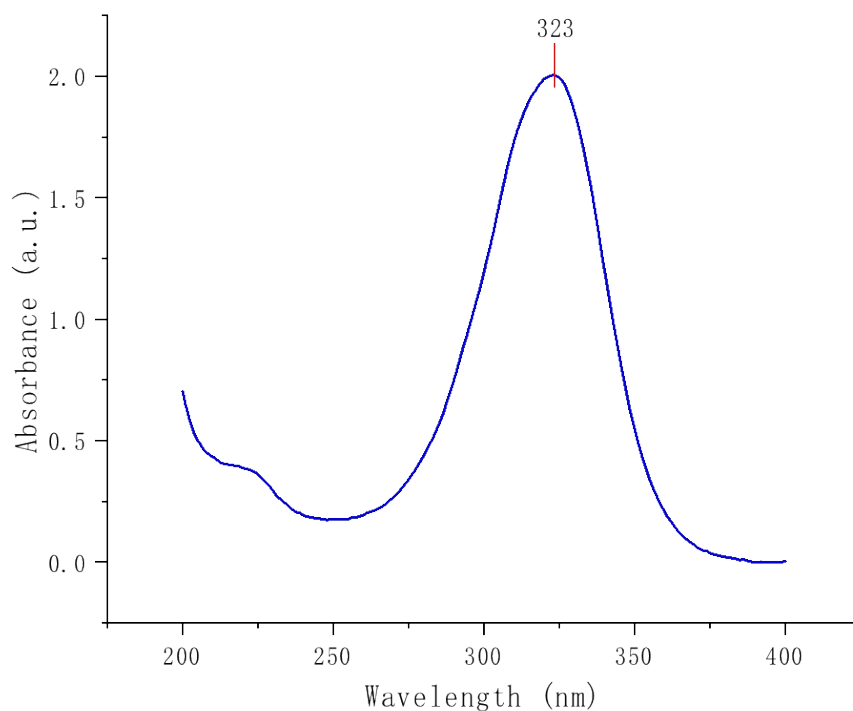

**Figure S29.** UV spectrum of compound **5** (MeOH)

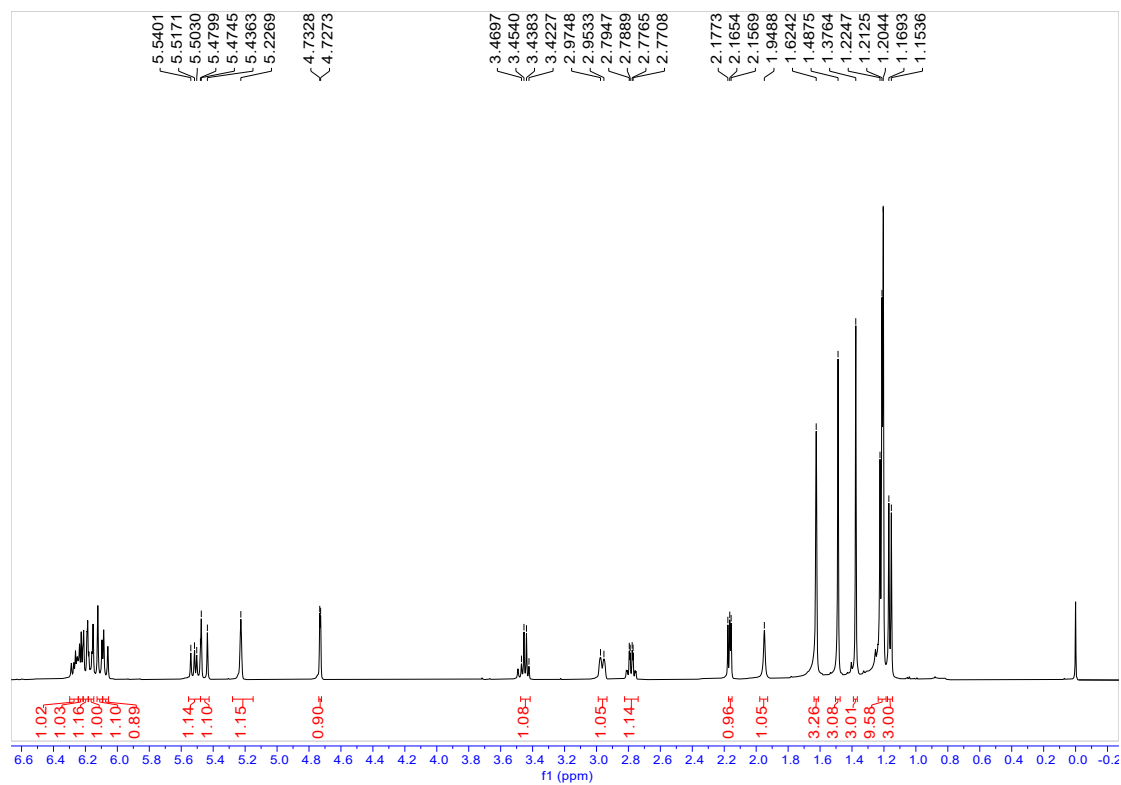

**Figure S30.** The <sup>1</sup>H NMR spectrum of **6** in CDCl<sub>3</sub> (400 MHz).

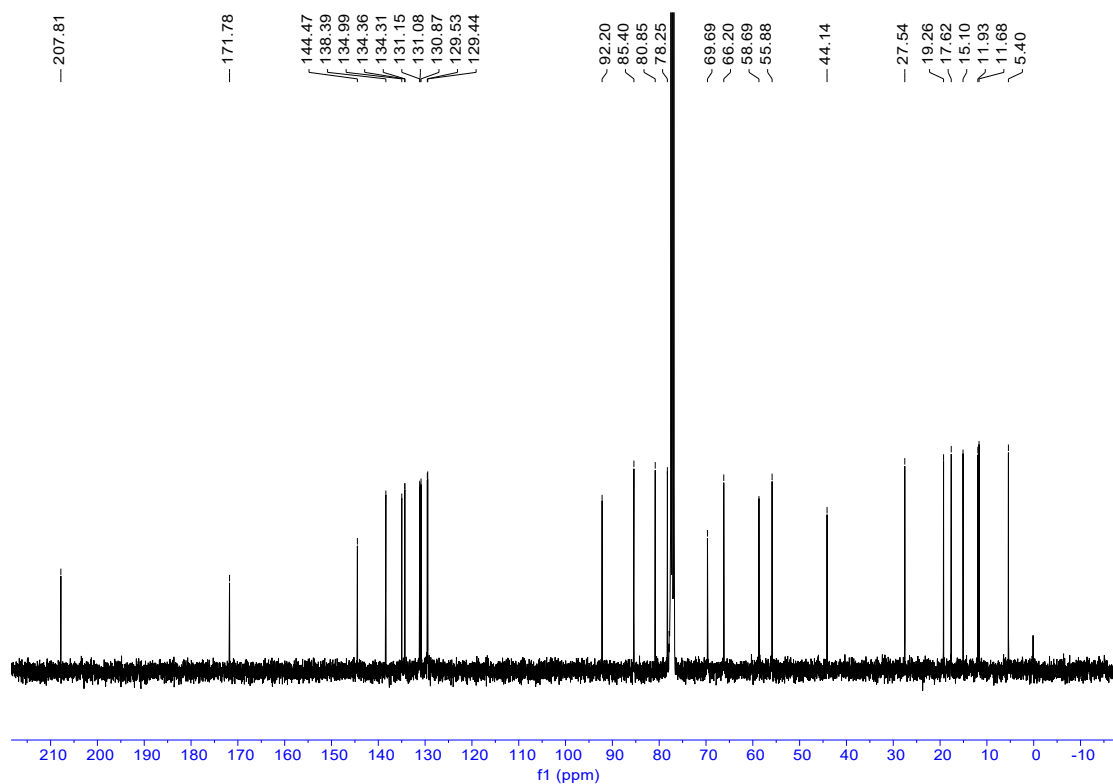

Figure S31. The  $^{13}\text{C}$  NMR spectrum of **6** in  $\text{CDCl}_3$  (100 MHz).

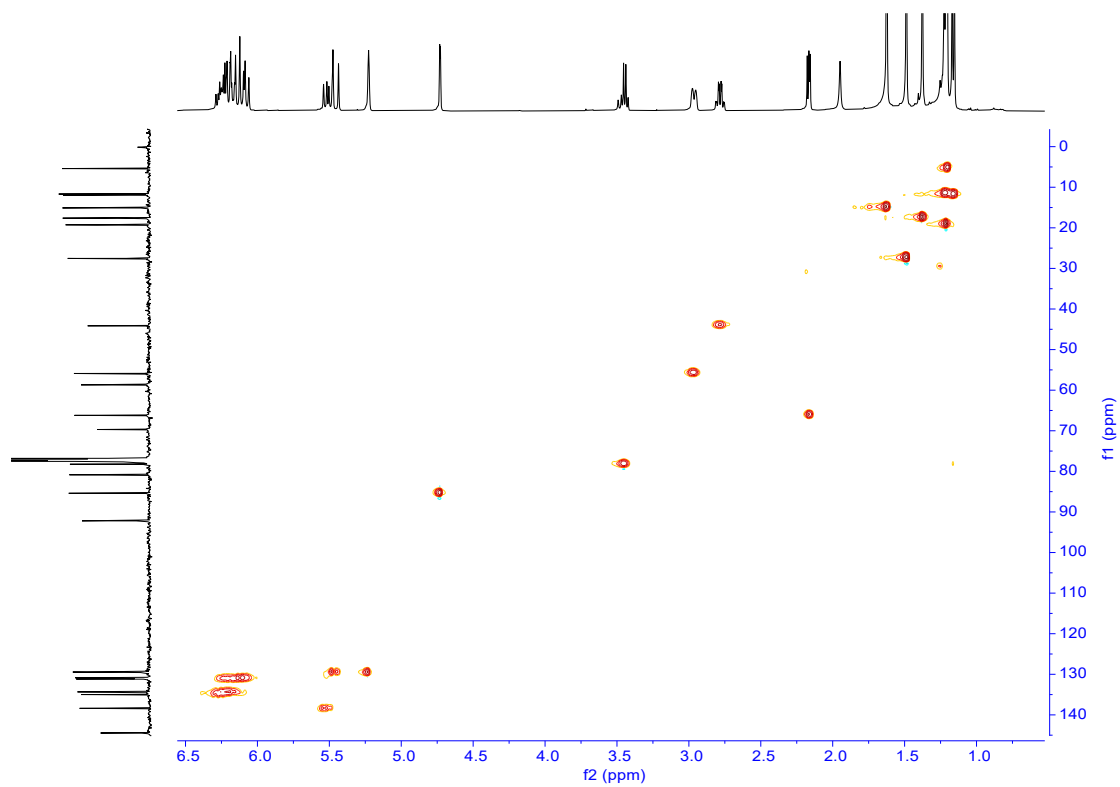

Figure S32. The HSQC spectrum of **6** in  $\text{CDCl}_3$ .

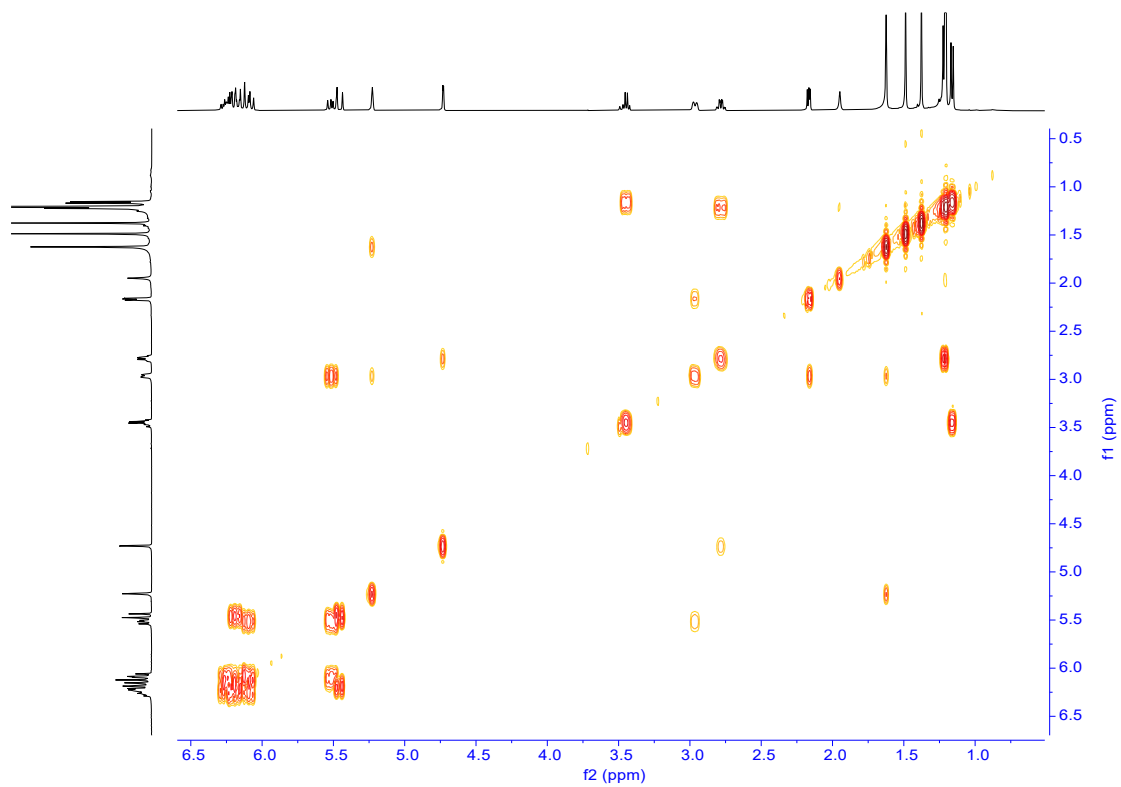

Figure S33. The  $^1\text{H}$ - $^1\text{H}$  COSY spectrum of **6** in  $\text{CDCl}_3$ .

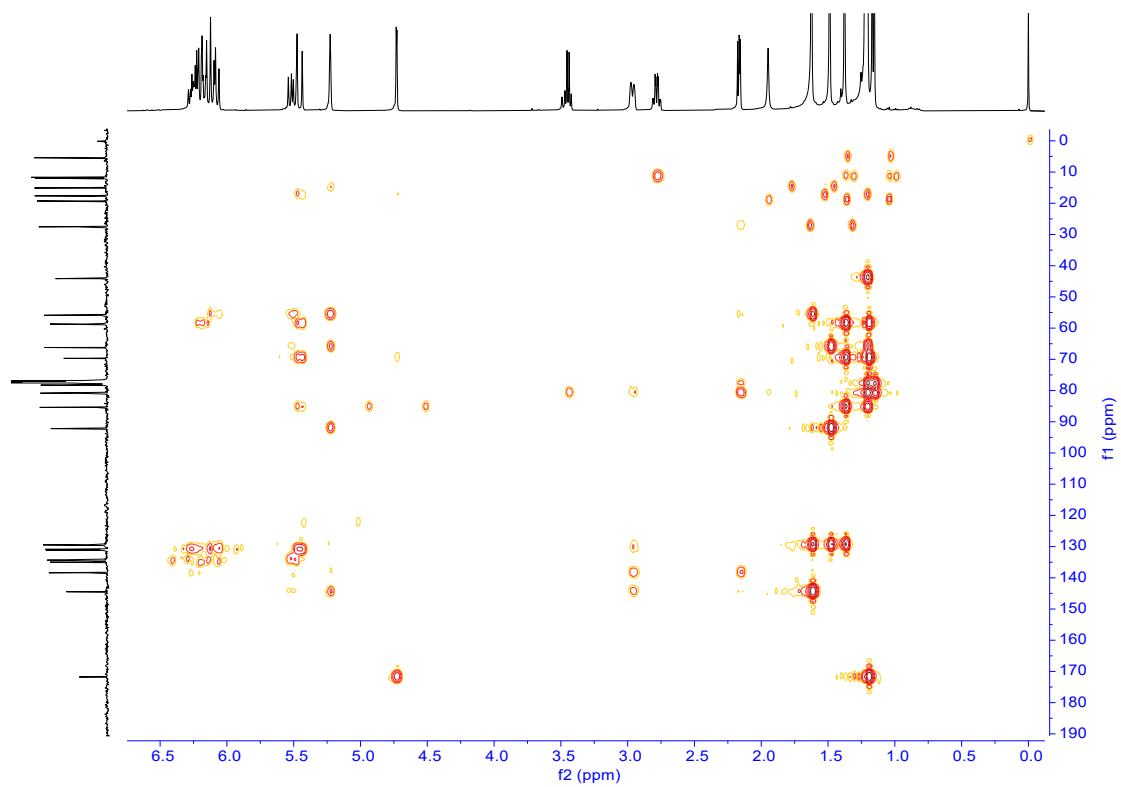

Figure S34. The HMBC spectrum of **6** in  $\text{CDCl}_3$ .

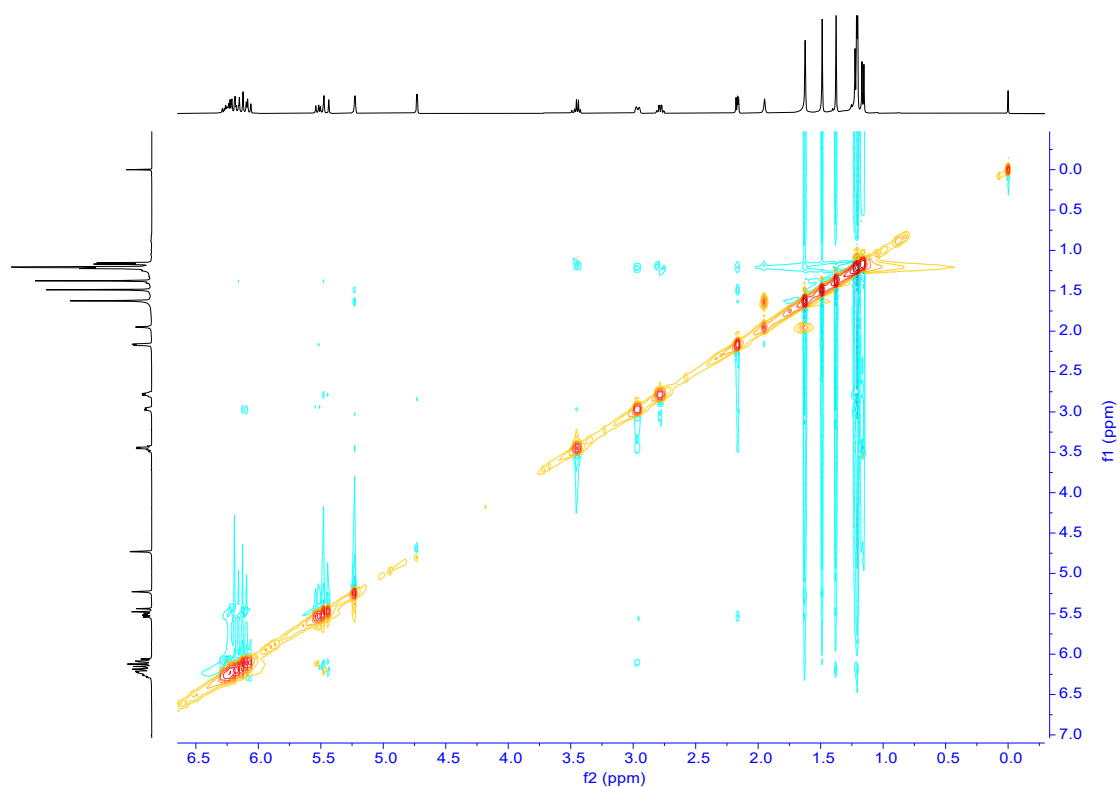

**Figure S35.** The NOESY spectrum of **6** in  $\text{CDCl}_3$ .

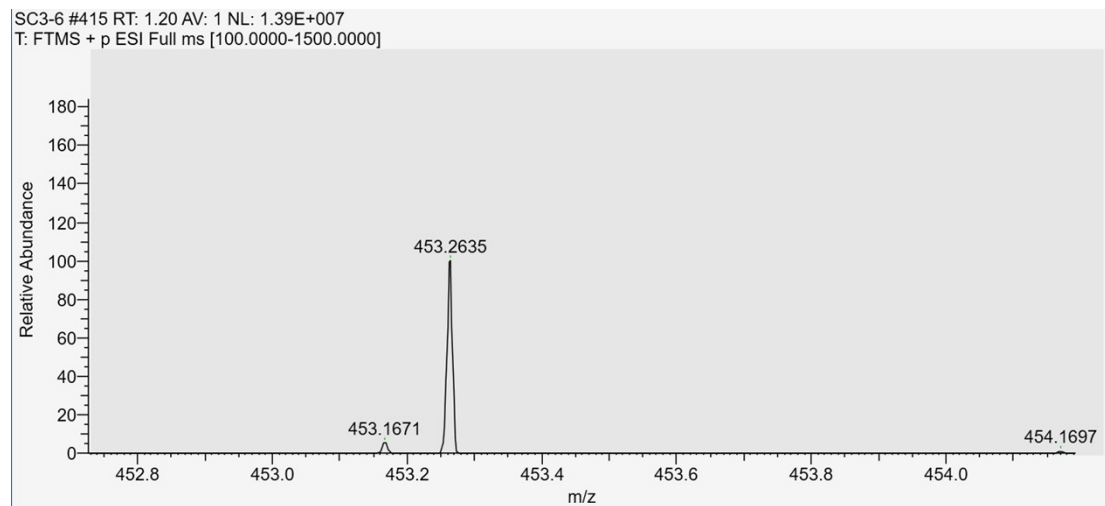

**Figure S36.** (+)-HRESIMS of compound **6**

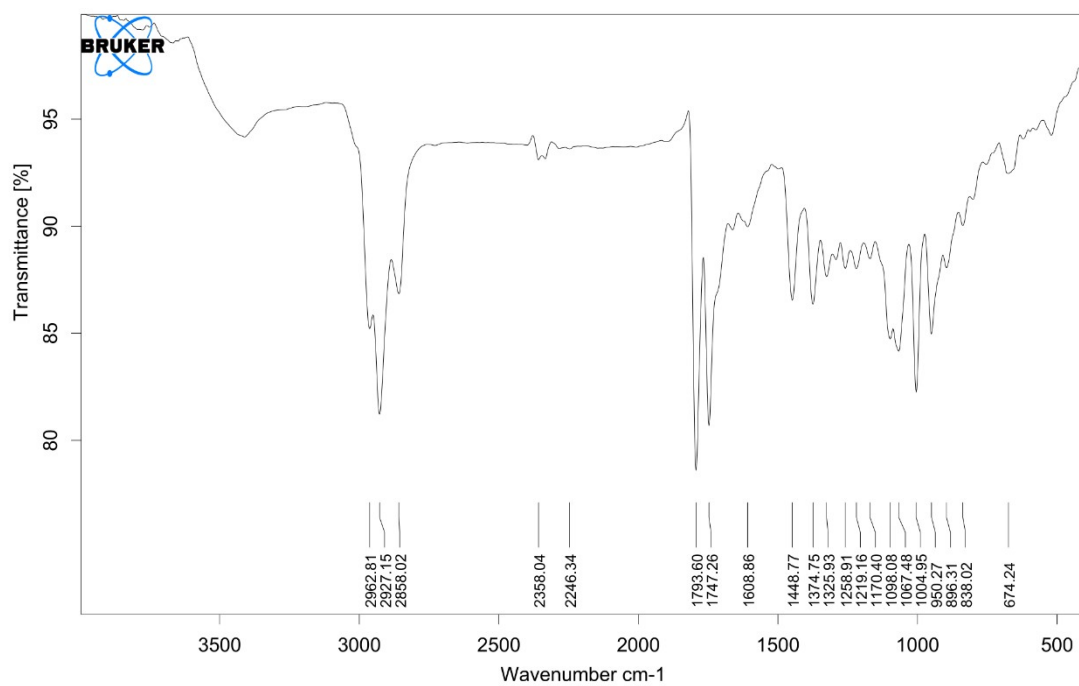

**Figure S37.** IR spectrum (film on KBr pellet) of compound **6**

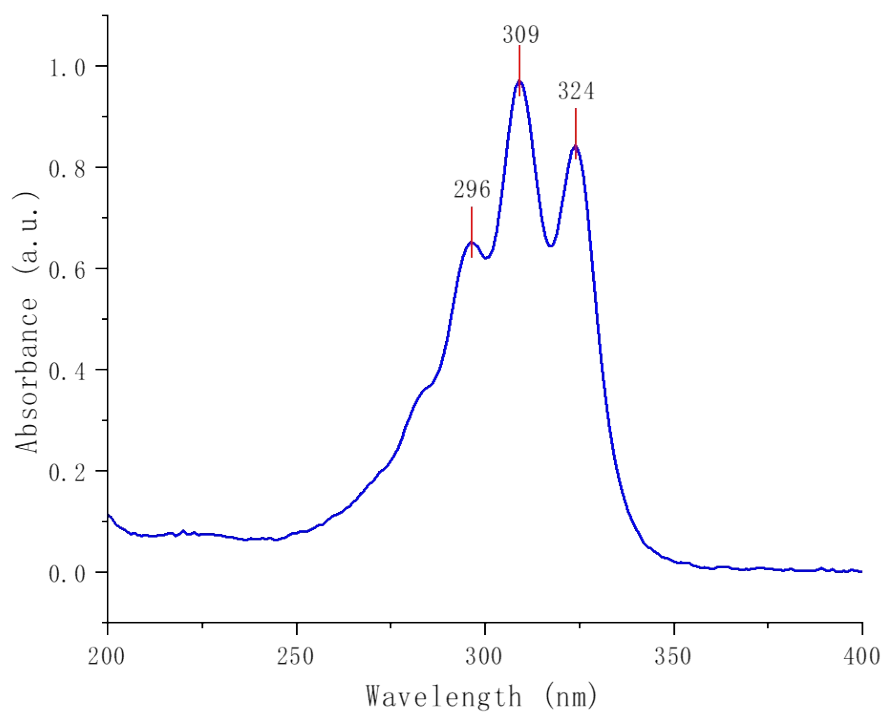

**Figure S38.** UV spectrum of compound **6** (MeCN)



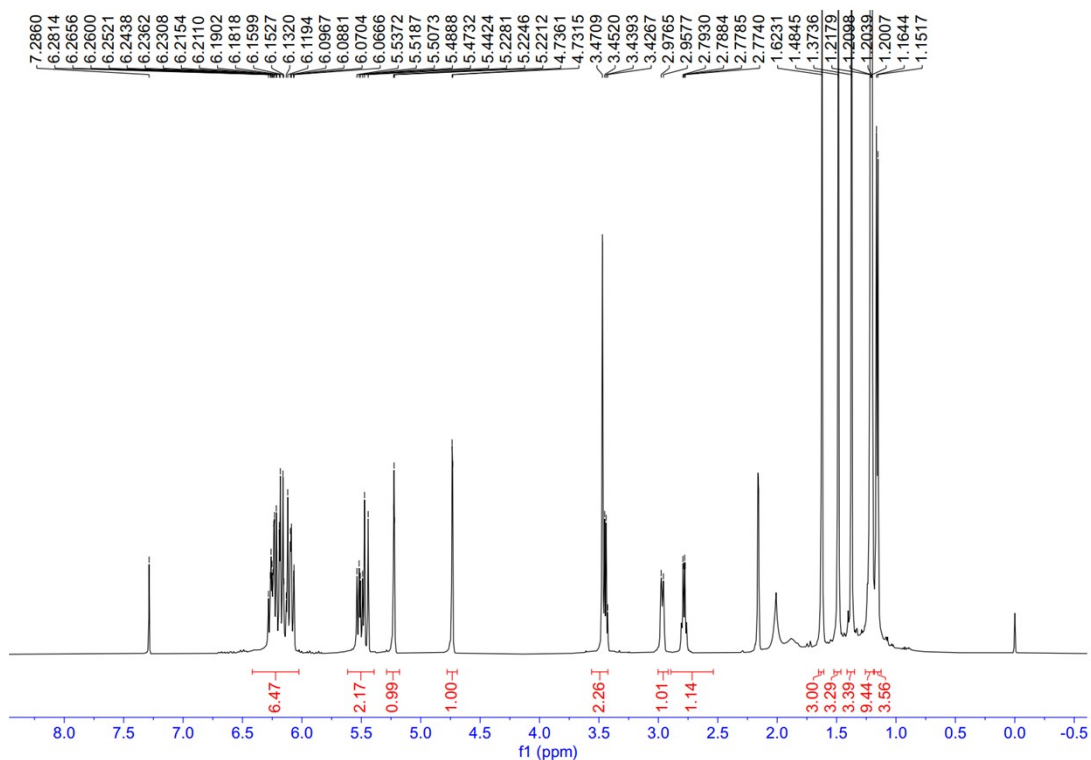

Figure S39. The  $^1\text{H}$  NMR spectrum of **7** in  $\text{CDCl}_3$  (400 MHz).

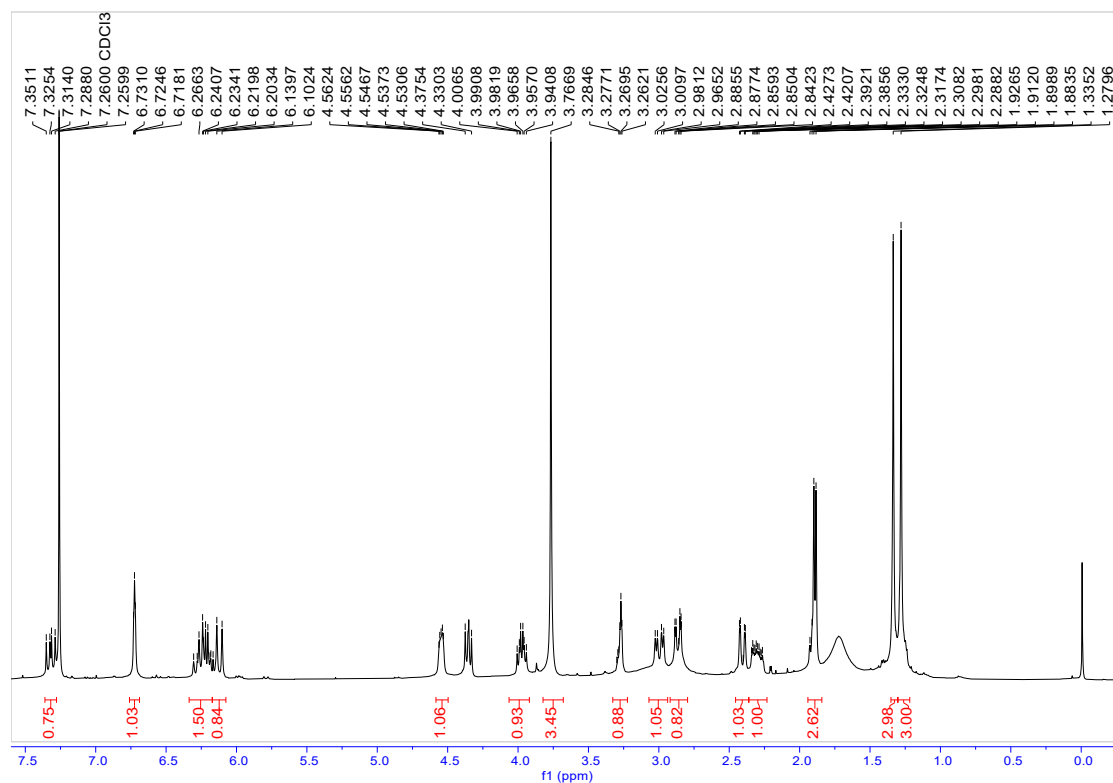

Figure S40. The  $^1\text{H}$  NMR spectrum of **8** in  $\text{CDCl}_3$  (400 MHz).

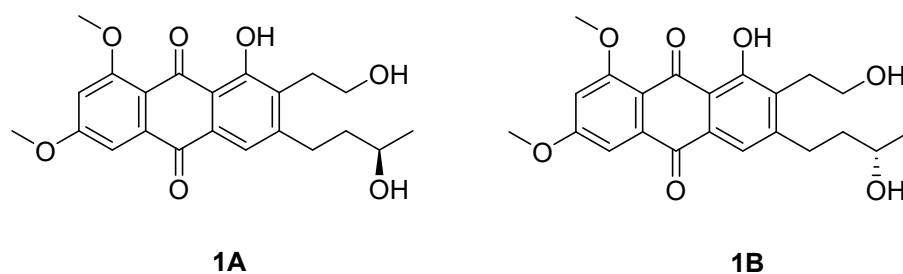

**Table S1.** Conformational analysis of the B3LYP/6-31G(d) optimized conformers of cpd-1A in the gas phase (T=298.15 K)

| Conformer | E <sup>a</sup> (Hartree) | C <sup>b</sup> (Hartree) | G <sup>c</sup> (kcal/mol) | ΔG <sup>d</sup> (kcal/mol) | Population <sup>e</sup> |
|-----------|--------------------------|--------------------------|---------------------------|----------------------------|-------------------------|
| cpd-1A-1  | -1379.251174             | 0.367908                 | -865249.249635            | 0.0                        | 48.36%                  |
| cpd-1A-2  | -1379.249315             | 0.367499                 | -865248.339766            | 0.909869                   | 10.40%                  |
| cpd-1A-3  | -1379.249211             | 0.367584                 | -865248.221106            | 1.028529                   | 8.51%                   |
| cpd-1A-4  | -1379.247336             | 0.365731                 | -865248.206893            | 1.042742                   | 8.31%                   |
| cpd-1A-5  | -1379.24923              | 0.367627                 | -865248.205795            | 1.04384                    | 8.29%                   |
| cpd-1A-6  | -1379.249282             | 0.367872                 | -865248.085064            | 1.164571                   | 6.76%                   |
| cpd-1A-7  | -1379.247778             | 0.366687                 | -865247.884609            | 1.365026                   | 4.82%                   |
| cpd-1A-8  | -1379.250101             | 0.369067                 | -865247.849048            | 1.400586                   | 4.54%                   |

<sup>a</sup>Electronic energy obtained at M062X/6-311+G(2d,p) level of theory; <sup>b</sup>Thermal correction to Gibbs free energy obtained at B3LYP/6-31G(d) level of theory; <sup>c</sup>Gibbs free energy (E + C); <sup>d</sup>The relative Gibbs free energy; <sup>e</sup>The Boltzmann distribution of each conformer.

**Table S2.** Atomic coordinates (Å) of cpd-1A-1 obtained at the B3LYP/6-31G(d) level of theory in the gas phase.

|   |           |           |           |   |           |           |           |
|---|-----------|-----------|-----------|---|-----------|-----------|-----------|
| C | 1.206474  | -1.748635 | -0.503142 | O | -1.349177 | -2.720047 | 0.137015  |
| C | 2.483213  | -1.221347 | -0.832276 | O | 4.968556  | -1.291066 | 0.972324  |
| C | 2.618557  | 0.159314  | -1.038317 | H | -5.801040 | -0.497385 | 0.588700  |
| C | 1.476600  | 0.978397  | -0.972053 | H | -3.129507 | 2.718907  | -0.406366 |
| C | 0.228115  | 0.459750  | -0.662033 | H | 1.538470  | 2.042678  | -1.168033 |
| C | -3.332981 | 1.676261  | -0.204380 | H | 4.768967  | 0.101694  | -1.167084 |
| C | -4.605754 | 1.194092  | 0.101618  | H | 3.977984  | 1.045876  | -2.426835 |
| C | -4.797640 | -0.168728 | 0.354868  | H | 5.120264  | 2.591519  | -1.024949 |
| C | -3.728267 | -1.064165 | 0.305131  | H | 3.423765  | 2.808781  | -0.660333 |
| C | -2.416768 | -0.595790 | -0.007742 | H | 5.502064  | 1.307644  | 0.996993  |
| C | -1.248694 | -1.495949 | -0.076984 | H | -5.569771 | -2.420814 | 1.778845  |
| C | 0.064758  | -0.917519 | -0.412632 | H | -5.886080 | -2.698737 | 0.037739  |
| C | -0.930268 | 1.376580  | -0.588343 | H | -5.051924 | -3.946866 | 1.006945  |
| C | -2.263798 | 0.785325  | -0.255810 | H | -4.910720 | 3.828725  | 0.648270  |
| C | -5.180145 | -2.874210 | 0.858954  | H | -5.221174 | 3.543283  | -1.090434 |
| C | -5.587357 | 3.356947  | -0.073968 | H | -6.589337 | 3.772964  | 0.036748  |
| C | 3.957984  | 0.805763  | -1.354599 | H | 0.170673  | -3.254483 | -0.065447 |

|   |           |           |           |   |          |           |           |
|---|-----------|-----------|-----------|---|----------|-----------|-----------|
| C | 4.254560  | 2.096823  | -0.567717 | H | 2.716317 | 1.305602  | 1.264241  |
| C | 4.576064  | 1.886584  | 0.916709  | H | 3.804983 | 3.794538  | 1.606862  |
| C | 4.732560  | 3.210872  | 1.659006  | H | 4.964636 | 3.028625  | 2.712256  |
| C | 3.631100  | -2.198882 | -0.897492 | H | 5.537647 | 3.813522  | 1.222749  |
| C | 4.297427  | -2.431557 | 0.474175  | H | 3.252747 | -3.160250 | -1.258048 |
| O | -0.811731 | 2.582717  | -0.786998 | H | 4.393269 | -1.859353 | -1.603877 |
| O | 1.130909  | -3.067979 | -0.276648 | H | 3.540727 | -2.799433 | 1.182688  |
| O | 3.600362  | 1.060995  | 1.583024  | H | 5.055748 | -3.214934 | 0.365806  |
| O | -3.885629 | -2.380666 | 0.544970  | H | 4.304719 | -0.635804 | 1.268862  |
| O | -5.719273 | 1.961564  | 0.178296  | - | -        | -         | -         |

**Table S3.** Atomic coordinates (Å) of cpd-1A-2 obtained at the B3LYP/6-31G(d) level of theory in the gas phase.

|   |           |           |           |   |           |           |           |
|---|-----------|-----------|-----------|---|-----------|-----------|-----------|
| C | 1.249109  | 1.572550  | -0.596172 | O | -1.256512 | 2.666306  | 0.041428  |
| C | 2.500952  | 0.985311  | -0.914363 | O | 4.798704  | 1.372777  | 1.211491  |
| C | 2.559783  | -0.393468 | -1.153719 | H | -5.783913 | 0.638959  | 0.633117  |
| C | 1.391173  | -1.164801 | -1.049329 | H | -3.264472 | -2.706508 | -0.332520 |
| C | 0.174488  | -0.596021 | -0.709569 | H | 1.421530  | -2.233691 | -1.230864 |
| C | -3.421889 | -1.652213 | -0.150786 | H | 3.562924  | -2.068318 | -1.984469 |
| C | -4.667300 | -1.111303 | 0.166876  | H | 4.378778  | -0.548784 | -2.297331 |
| C | -4.799140 | 0.263919  | 0.389850  | H | 5.611405  | -2.047514 | -0.745981 |
| C | -3.695351 | 1.113010  | 0.298116  | H | 5.294920  | -0.462470 | -0.035491 |
| C | -2.410374 | 0.583974  | -0.027644 | H | 3.534141  | -2.874657 | 0.539856  |
| C | -1.207206 | 1.433483  | -0.142053 | H | -5.456652 | 2.577355  | 1.766787  |
| C | 0.074211  | 0.792854  | -0.481882 | H | -4.891471 | 4.062694  | 0.949794  |
| C | -1.016608 | -1.461131 | -0.592487 | H | -5.789746 | 2.825548  | 0.024715  |
| C | -2.318358 | -0.807372 | -0.244528 | H | -5.068259 | -3.718932 | 0.778574  |
| C | -5.063755 | 2.992588  | 0.830216  | H | -6.754923 | -3.607890 | 0.197208  |
| C | -5.739373 | -3.234942 | 0.059117  | H | -5.400226 | -3.457581 | -0.959489 |
| C | 3.840103  | -1.111790 | -1.526014 | H | 0.278767  | 3.132947  | -0.198193 |
| C | 4.819511  | -1.390552 | -0.365904 | H | 2.974241  | -1.459598 | 2.294581  |
| C | 4.196049  | -2.054805 | 0.860990  | H | 4.795001  | -3.018907 | 2.717811  |
| C | 5.256565  | -2.594473 | 1.817198  | H | 5.847895  | -3.384937 | 1.341955  |
| C | 3.697264  | 1.904073  | -0.959417 | H | 5.930969  | -1.787937 | 2.124361  |
| C | 4.175873  | 2.377472  | 0.432642  | H | 4.537359  | 1.427655  | -1.471619 |
| O | -0.957074 | -2.675520 | -0.769041 | H | 3.427463  | 2.801468  | -1.529002 |
| O | 1.229045  | 2.902234  | -0.410242 | H | 4.933707  | 3.154868  | 0.286994  |
| O | 3.394996  | -1.054889 | 1.520974  | H | 3.331365  | 2.834575  | 0.964562  |
| O | -3.795502 | 2.440869  | 0.508802  | H | 4.146863  | 0.675595  | 1.423312  |
| O | -5.810161 | -1.830792 | 0.283400  | - | -         | -         | -         |

**Table S4.** Atomic coordinates (Å) of cpd-1A-3 obtained at the B3LYP/6-31G(d) level of theory in the gas phase.

|   |           |           |           |   |           |           |           |
|---|-----------|-----------|-----------|---|-----------|-----------|-----------|
| C | -1.220555 | 1.720249  | -0.487209 | O | 1.368638  | 2.609021  | 0.137064  |
| C | -2.515717 | 1.235490  | -0.808006 | O | -4.972978 | 1.347746  | 1.031935  |
| C | -2.693318 | -0.137175 | -1.035142 | H | 5.746550  | 0.293038  | 0.519770  |
| C | -1.574562 | -0.989180 | -0.998797 | H | 3.028531  | -2.875952 | -0.506690 |
| C | -0.307694 | -0.512292 | -0.696175 | H | -1.669170 | -2.047796 | -1.211724 |
| C | 3.220514  | -1.831831 | -0.294002 | H | -4.842592 | -0.016447 | -1.130864 |
| C | 4.512997  | -1.393783 | 0.010163  | H | -4.097654 | -0.963569 | -2.416417 |
| C | 4.748895  | -0.044661 | 0.284288  | H | -5.260922 | -2.499137 | -1.021141 |
| C | 3.693324  | 0.879996  | 0.256000  | H | -3.565952 | -2.766681 | -0.683311 |
| C | 2.372199  | 0.457147  | -0.051901 | H | -5.579462 | -1.233300 | 1.023774  |
| C | 1.231004  | 1.391178  | -0.094840 | H | 5.896767  | 2.469649  | 0.001139  |
| C | -0.101689 | 0.855401  | -0.424968 | H | 5.096695  | 3.718036  | 0.996404  |
| C | 0.823183  | -1.466009 | -0.653325 | H | 5.585170  | 2.170004  | 1.740743  |
| C | 2.177241  | -0.920595 | -0.323054 | H | 7.401178  | -2.879397 | 0.262586  |
| C | 5.199309  | 2.645321  | 0.829977  | H | 7.191944  | -1.240734 | -0.416331 |
| C | 6.810917  | -1.963983 | 0.315646  | H | 6.887652  | -1.537869 | 1.323907  |
| C | -4.055098 | -0.740479 | -1.341184 | H | -0.136020 | 3.187870  | -0.038250 |
| C | -4.376088 | -2.034544 | -0.568934 | H | -2.791629 | -1.316271 | 1.253878  |
| C | -4.671863 | -1.837539 | 0.922556  | H | -5.070313 | -2.994615 | 2.706242  |
| C | -4.857641 | -3.167718 | 1.647354  | H | -5.686118 | -3.739419 | 1.213237  |
| C | -3.635718 | 2.246646  | -0.842368 | H | -3.948829 | -3.777992 | 1.573988  |
| C | -4.277153 | 2.476674  | 0.541363  | H | -3.234155 | 3.202372  | -1.192783 |
| O | 0.664981  | -2.662748 | -0.873773 | H | -4.416346 | 1.940580  | -1.543903 |
| O | -1.104113 | 3.033077  | -0.239831 | H | -3.501175 | 2.812887  | 1.244813  |
| O | -3.663946 | -1.050609 | 1.587827  | H | -5.014900 | 3.282177  | 0.455091  |
| O | 3.892856  | 2.187234  | 0.517062  | H | -4.323584 | 0.669069  | 1.307235  |
| O | 5.475740  | -2.347019 | 0.016462  | - | -         | -         | -         |

**Table S5.** Atomic coordinates (Å) of cpd-1A-4 obtained at the B3LYP/6-31G(d) level of theory in the gas phase.

|   |           |           |           |   |           |           |           |
|---|-----------|-----------|-----------|---|-----------|-----------|-----------|
| C | 1.290898  | 1.367188  | 0.040155  | O | -1.205877 | 2.473728  | 0.674754  |
| C | 2.539736  | 0.775345  | -0.274756 | O | 2.926890  | 3.190395  | -1.881105 |
| C | 2.563999  | -0.549927 | -0.725101 | H | -5.846963 | 0.626826  | 0.590151  |
| C | 1.364063  | -1.274561 | -0.817921 | H | -3.396888 | -2.654304 | -0.716320 |
| C | 0.147415  | -0.701545 | -0.484508 | H | 1.367149  | -2.303105 | -1.164112 |
| C | -3.524433 | -1.635103 | -0.378221 | H | 3.668455  | -1.814705 | -2.035220 |
| C | -4.768751 | -1.084955 | -0.069685 | H | 4.650175  | -0.556070 | -1.301731 |
| C | -4.861950 | 0.242750  | 0.362443  | H | 3.493716  | -2.969650 | 0.194007  |
| C | -3.720429 | 1.035061  | 0.491288  | H | 5.136848  | -2.868174 | -0.428719 |
| C | -2.435791 | 0.495097  | 0.181396  | H | 3.962208  | -0.969266 | 1.656670  |
| C | -1.195309 | 1.284753  | 0.296234  | H | -4.841064 | 3.907787  | 1.513781  |

|   |           |           |           |   |           |           |           |
|---|-----------|-----------|-----------|---|-----------|-----------|-----------|
| C | 0.084518  | 0.639090  | -0.047758 | H | -5.711024 | 2.879820  | 0.339293  |
| C | -1.085601 | -1.507788 | -0.601502 | H | -5.534128 | 2.347163  | 2.040255  |
| C | -2.383266 | -0.847483 | -0.251120 | H | -6.952120 | -3.442331 | -0.585374 |
| C | -5.048223 | 2.880207  | 1.213538  | H | -5.505788 | -3.189216 | -1.604637 |
| C | -5.914300 | -3.107239 | -0.590574 | H | -5.322703 | -3.729962 | 0.090801  |
| C | 3.844218  | -1.264971 | -1.103106 | H | 0.340864  | 2.889038  | 0.621532  |
| C | 4.306960  | -2.266861 | -0.027341 | H | 6.595382  | -1.223723 | 0.702194  |
| C | 4.766129  | -1.609795 | 1.277611  | H | 4.275460  | -3.266259 | 2.602768  |
| C | 5.134945  | -2.637221 | 2.345216  | H | 5.937140  | -3.298181 | 1.989494  |
| C | 3.772690  | 1.637656  | -0.149255 | H | 5.483275  | -2.133105 | 3.251623  |
| C | 4.049646  | 2.459060  | -1.421652 | H | 3.628738  | 2.330639  | 0.686516  |
| O | -1.060948 | -2.678665 | -0.970441 | H | 4.653486  | 1.036112  | 0.089289  |
| O | 1.300662  | 2.657354  | 0.435906  | H | 4.909275  | 3.121559  | -1.225166 |
| O | 5.851709  | -0.702109 | 1.046223  | H | 4.335211  | 1.789586  | -2.242695 |
| O | -3.781774 | 2.316035  | 0.904971  | H | 2.424108  | 3.476956  | -1.099910 |
| O | -5.944885 | -1.751737 | -0.154906 | - | -         | -         | -         |

**Table S6.** Atomic coordinates (Å) of cpd-1A-5 obtained at the B3LYP/6-31G(d) level of theory in the gas phase.

|   |           |           |           |   |           |           |           |
|---|-----------|-----------|-----------|---|-----------|-----------|-----------|
| C | -1.039196 | 1.451961  | -0.544365 | O | 1.481088  | 2.595923  | -0.095697 |
| C | -2.300517 | 0.840696  | -0.768626 | O | -4.306900 | 1.401924  | 1.431524  |
| C | -2.367139 | -0.558120 | -0.878390 | H | 6.032975  | 0.631213  | 0.520894  |
| C | -1.192503 | -1.318137 | -0.743193 | H | 3.498036  | -2.786714 | -0.083897 |
| C | 0.034588  | -0.719325 | -0.506650 | H | -1.227996 | -2.399203 | -0.825778 |
| C | 3.656084  | -1.720619 | 0.004678  | H | -4.381236 | -0.683915 | -1.637218 |
| C | 4.909469  | -1.153246 | 0.236102  | H | -3.460971 | -2.176272 | -1.728046 |
| C | 5.042517  | 0.235897  | 0.341037  | H | -4.088506 | -2.822815 | 0.419163  |
| C | 3.933010  | 1.073089  | 0.215998  | H | -3.892066 | -1.213144 | 1.072559  |
| C | 2.640308  | 0.516758  | -0.022929 | H | -6.284778 | -2.118969 | -0.586339 |
| C | 1.432707  | 1.351604  | -0.168229 | H | 5.730262  | 2.652089  | 1.507409  |
| C | 0.140201  | 0.683340  | -0.404407 | H | 6.010394  | 2.764327  | -0.258140 |
| C | 1.237441  | -1.570400 | -0.368832 | H | 5.134118  | 4.067827  | 0.594163  |
| C | 2.546827  | -0.888394 | -0.121245 | H | 5.616221  | -3.589483 | -0.706947 |
| C | 5.308444  | 2.992238  | 0.553513  | H | 7.007407  | -3.634295 | 0.414572  |
| C | 5.986106  | -3.277571 | 0.276829  | H | 5.340755  | -3.696897 | 1.057612  |
| C | -3.663912 | -1.303864 | -1.097872 | H | -0.057005 | 3.039287  | -0.320991 |
| C | -4.319877 | -1.768150 | 0.228606  | H | -5.668433 | 0.351464  | 0.625568  |
| C | -5.840968 | -1.555091 | 0.245141  | H | -6.033740 | -1.483001 | 2.406061  |
| C | -6.462601 | -2.032528 | 1.558278  | H | -7.541856 | -1.853196 | 1.549439  |
| C | -3.499124 | 1.757941  | -0.883670 | H | -6.285257 | -3.102339 | 1.722104  |
| C | -3.918528 | 2.381611  | 0.456990  | H | -3.253058 | 2.582239  | -1.563361 |
| O | 1.175289  | -2.793317 | -0.451234 | H | -4.359740 | 1.227554  | -1.291746 |
| O | -1.015912 | 2.792430  | -0.474172 | H | -3.114659 | 3.008529  | 0.856182  |

|   |           |           |           |   |           |          |          |
|---|-----------|-----------|-----------|---|-----------|----------|----------|
| O | -6.171148 | -0.195451 | -0.014306 | H | -4.803516 | 3.005684 | 0.308806 |
| O | 4.033393  | 2.413269  | 0.314234  | H | -3.522651 | 0.860187 | 1.616407 |
| O | 6.057350  | -1.858316 | 0.374520  | - | -         | -        | -        |

**Table S7.** Atomic coordinates (Å) of cpd-1A-6 obtained at the B3LYP/6-31G(d) level of theory in the gas phase.

|   |           |           |           |   |           |           |           |
|---|-----------|-----------|-----------|---|-----------|-----------|-----------|
| C | -1.189810 | -1.776315 | -0.460780 | O | 1.371557  | -2.741265 | 0.161100  |
| C | -2.469095 | -1.250888 | -0.782414 | O | -5.186594 | -1.477579 | 0.862136  |
| C | -2.607865 | 0.129274  | -0.984860 | H | 5.820546  | -0.507521 | 0.583623  |
| C | -1.469163 | 0.950303  | -0.933209 | H | 3.138109  | 2.698041  | -0.417359 |
| C | -0.216873 | 0.434036  | -0.639143 | H | -1.540170 | 2.016477  | -1.112842 |
| C | 3.344930  | 1.657007  | -0.210464 | H | -4.102202 | 0.858394  | -2.346205 |
| C | 4.619828  | 1.178841  | 0.091687  | H | -4.748202 | 0.084122  | -0.908993 |
| C | 4.815495  | -0.182057 | 0.352413  | H | -3.544569 | 2.893965  | -1.086441 |
| C | 3.747416  | -1.079369 | 0.312897  | H | -5.213940 | 2.446961  | -0.804460 |
| C | 2.433673  | -0.615193 | 0.003278  | H | -2.870025 | 1.938463  | 1.092402  |
| C | 1.266645  | -1.517914 | -0.056322 | H | 5.908234  | -2.711657 | 0.050376  |
| C | -0.049605 | -0.942807 | -0.384747 | H | 5.595915  | -2.421285 | 1.790007  |
| C | 0.939858  | 1.351973  | -0.579581 | H | 5.079455  | -3.954326 | 1.031098  |
| C | 2.276769  | 0.764133  | -0.251137 | H | 4.922925  | 3.817508  | 0.618766  |
| C | 5.204599  | -2.882460 | 0.874628  | H | 6.598697  | 3.760728  | -0.000527 |
| C | 5.597021  | 3.341809  | -0.103332 | H | 5.225365  | 3.520564  | -1.119225 |
| C | -3.963740 | 0.754729  | -1.260488 | H | -0.148628 | -3.280182 | -0.029968 |
| C | -4.177256 | 2.134493  | -0.611348 | H | -5.582396 | 1.260919  | 1.427938  |
| C | -3.919922 | 2.176184  | 0.899901  | H | -4.060286 | 3.533642  | 2.580418  |
| C | -4.245196 | 3.540006  | 1.502260  | H | -3.630970 | 4.324792  | 1.046912  |
| C | -3.608094 | -2.236930 | -0.892060 | H | -5.298906 | 3.799704  | 1.334127  |
| C | -4.331420 | -2.523900 | 0.439309  | H | -4.350098 | -1.894065 | -1.619102 |
| O | 0.821437  | 2.556723  | -0.787984 | H | -3.201621 | -3.184041 | -1.259994 |
| O | -1.110852 | -3.096276 | -0.233690 | H | -4.975059 | -3.399310 | 0.300681  |
| O | -4.632622 | 1.137324  | 1.593263  | H | -3.588705 | -2.779273 | 1.209265  |
| O | 3.908381  | -2.394404 | 0.560550  | H | -4.656490 | -0.718530 | 1.174176  |
| O | 5.732924  | 1.948752  | 0.157926  | - | -         | -         | -         |

**Table S8.** Atomic coordinates (Å) of cpd-1A-7 obtained at the B3LYP/6-31G(d) level of theory in the gas phase.

|   |           |           |           |   |           |           |           |
|---|-----------|-----------|-----------|---|-----------|-----------|-----------|
| C | 0.928907  | -1.701760 | -0.463384 | O | -1.657352 | -2.652251 | 0.063044  |
| C | 2.221900  | -1.185379 | -0.738076 | O | 4.622180  | -1.423752 | 1.118246  |
| C | 2.384650  | 0.199478  | -0.868012 | H | -6.074030 | -0.368087 | 0.541555  |
| C | 1.265291  | 1.043022  | -0.768634 | H | -3.319648 | 2.842729  | -0.218487 |
| C | 0.000075  | 0.536719  | -0.519930 | H | 1.373373  | 2.116622  | -0.882342 |
| C | -3.548132 | 1.795183  | -0.077546 | H | 4.493524  | 0.118185  | -1.329954 |
| C | -4.836054 | 1.322961  | 0.173683  | H | 3.681643  | 1.569769  | -1.884953 |

|   |           |           |           |   |           |           |           |
|---|-----------|-----------|-----------|---|-----------|-----------|-----------|
| C | -5.059434 | -0.047447 | 0.348257  | H | 3.652006  | 2.539850  | 0.312228  |
| C | -4.006199 | -0.959850 | 0.272890  | H | 3.950497  | 0.986604  | 1.096038  |
| C | -2.679286 | -0.501628 | 0.014530  | H | 6.012249  | 2.233991  | -0.764022 |
| C | -1.526704 | -1.420109 | -0.080645 | H | -5.401769 | -3.848390 | 0.787801  |
| C | -0.196053 | -0.851249 | -0.354392 | H | -5.907805 | -2.355221 | 1.628712  |
| C | -1.142482 | 1.469770  | -0.426270 | H | -6.188323 | -2.533219 | -0.131298 |
| C | -2.494643 | 0.887239  | -0.153812 | H | -6.768166 | 3.941556  | 0.203526  |
| C | -5.505064 | -2.766814 | 0.694771  | H | -5.103403 | 3.930042  | 0.854355  |
| C | -5.772197 | 3.510997  | 0.093247  | H | -5.378512 | 3.743434  | -0.903297 |
| C | 3.734597  | 0.852303  | -1.055887 | H | -0.147505 | -3.206759 | -0.134938 |
| C | 4.196451  | 1.592343  | 0.217194  | H | 6.434275  | 0.407916  | 1.315533  |
| C | 5.705457  | 1.857649  | 0.219412  | H | 5.664669  | 3.832762  | 1.124717  |
| C | 6.125944  | 2.854172  | 1.294767  | H | 5.808560  | 2.506629  | 2.287357  |
| C | 3.346851  | -2.184415 | -0.860486 | H | 7.213544  | 2.977802  | 1.300949  |
| C | 4.014242  | -2.535346 | 0.480155  | H | 2.949779  | -3.111890 | -1.284357 |
| O | -1.002113 | 2.681812  | -0.565124 | H | 4.112006  | -1.820875 | -1.555099 |
| O | 0.821873  | -3.031320 | -0.312881 | H | 3.260075  | -2.912800 | 1.176219  |
| O | 6.439066  | 0.621983  | 0.366919  | H | 4.744711  | -3.342540 | 0.309150  |
| O | -4.194574 | -2.284582 | 0.436977  | H | 5.253546  | -1.010883 | 0.501396  |
| O | -5.937080 | 2.107578  | 0.267598  | - | -         | -         | -         |

**Table S9.** Atomic coordinates (Å) of cpd-1A-8 obtained at the B3LYP/6-31G(d) level of theory in the gas phase.

|   |           |           |           |   |           |           |           |
|---|-----------|-----------|-----------|---|-----------|-----------|-----------|
| C | -1.320447 | 1.554137  | -0.559050 | O | 1.188439  | 2.690076  | -0.016906 |
| C | -2.574282 | 0.946632  | -0.831847 | O | -4.898372 | 1.441591  | 1.284702  |
| C | -2.627329 | -0.443547 | -1.023029 | H | 5.752684  | 0.729655  | 0.516686  |
| C | -1.445540 | -1.198882 | -0.916803 | H | 3.245750  | -2.671657 | -0.270543 |
| C | -0.226060 | -0.605656 | -0.621532 | H | -1.461930 | -2.270994 | -1.078503 |
| C | 3.395194  | -1.610286 | -0.127390 | H | -4.406105 | -0.686244 | -2.199732 |
| C | 4.643444  | -1.046306 | 0.138706  | H | -3.629781 | -2.180362 | -1.722780 |
| C | 4.765865  | 0.336758  | 0.313101  | H | -5.391052 | -0.354331 | -0.004218 |
| C | 3.650877  | 1.171560  | 0.224818  | H | -5.747164 | -1.981474 | -0.582186 |
| C | 2.363243  | 0.618752  | -0.047515 | H | -5.289074 | -1.931052 | 1.792996  |
| C | 1.150851  | 1.452031  | -0.155888 | H | 5.432376  | 2.701238  | 1.597264  |
| C | -0.135828 | 0.788035  | -0.441424 | H | 5.717073  | 2.897515  | -0.160376 |
| C | 0.978870  | -1.456576 | -0.510601 | H | 4.828429  | 4.153425  | 0.748821  |
| C | 2.280846  | -0.780410 | -0.217694 | H | 5.089831  | -3.626041 | 0.830531  |
| C | 5.011159  | 3.082288  | 0.658753  | H | 5.372295  | -3.425225 | -0.924854 |
| C | 5.735442  | -3.162246 | 0.075582  | H | 6.758763  | -3.518119 | 0.199592  |
| C | -3.908210 | -1.185334 | -1.359321 | H | -0.355878 | 3.135290  | -0.236314 |
| C | -4.942871 | -1.326636 | -0.221156 | H | -2.685726 | -1.005796 | 1.268440  |
| C | -4.431612 | -1.894467 | 1.112401  | H | -3.546261 | -3.648536 | 2.017091  |
| C | -3.823916 | -3.292274 | 1.020456  | H | -4.540083 | -3.998290 | 0.584944  |

|   |           |           |           |   |           |           |           |
|---|-----------|-----------|-----------|---|-----------|-----------|-----------|
| C | -3.772649 | 1.859872  | -0.901502 | H | -2.922946 | -3.301313 | 0.397381  |
| C | -4.242213 | 2.394640  | 0.474662  | H | -3.504207 | 2.732318  | -1.508948 |
| O | 0.921786  | -2.674721 | -0.651704 | H | -4.615119 | 1.364150  | -1.390210 |
| O | -1.307836 | 2.887696  | -0.421043 | H | -3.386420 | 2.848161  | 0.991969  |
| O | -3.518560 | -0.988882 | 1.768387  | H | -4.974369 | 3.188927  | 0.293610  |
| O | 3.741104  | 2.505608  | 0.388307  | H | -4.267081 | 0.740060  | 1.548932  |
| O | 5.795564  | -1.749344 | 0.246760  | - | -         | -         | -         |

**Table S10.** Key transitions, oscillator strengths, and rotatory strengths in the ECD spectrum of conformer **cpd-1A-1** at the CAM-B3LYP/Def2SVP level of theory in MeOH with IEFPCM solvent model.

| <i>Num<sup>a</sup></i> | <i>Transition<sup>b</sup></i> | <i>CI-coeff<sup>b</sup></i> | <i><math>\Delta E</math> (eV)<sup>d</sup></i> | <i><math>\lambda</math> (nm)<sup>e</sup></i> | <i><math>f</math><sup>f</sup></i> | <i><math>R_{\text{vel}}^g</math></i> | <i><math>R_{\text{len}}^h</math></i> |
|------------------------|-------------------------------|-----------------------------|-----------------------------------------------|----------------------------------------------|-----------------------------------|--------------------------------------|--------------------------------------|
| 1                      | 105->107                      | 0.22621                     | 3.2711                                        | 379.03                                       | 0.3129                            | 14.5534                              | 15.2431                              |
|                        | 106->107                      | 0.6459                      |                                               |                                              |                                   |                                      |                                      |
| 2                      | 100->107                      | -0.31382                    | 3.4078                                        | 363.82                                       | 0.0005                            | 2.5158                               | 3.4309                               |
|                        | 102->107                      | 0.58216                     |                                               |                                              |                                   |                                      |                                      |
| 3                      | 105->107                      | 0.64172                     | 3.6239                                        | 342.13                                       | 0.0263                            | -18.0873                             | -18.9084                             |
|                        | 106->107                      | -0.22862                    |                                               |                                              |                                   |                                      |                                      |
| 4                      | 100->107                      | 0.55822                     | 3.7520                                        | 330.45                                       | 0.0006                            | 1.744                                | 1.4189                               |
|                        | 102->107                      | 0.29972                     |                                               |                                              |                                   |                                      |                                      |
|                        | 102->108                      | -0.25205                    |                                               |                                              |                                   |                                      |                                      |
| 5                      | 104->107                      | 0.66186                     | 3.9186                                        | 316.40                                       | 0.0602                            | -9.4841                              | -9.2127                              |
| 6                      | 103->107                      | 0.6704                      | 4.4771                                        | 276.93                                       | 0.2526                            | 11.4118                              | 12.8778                              |
| 7                      | 106->108                      | 0.6283                      | 5.0809                                        | 244.02                                       | 0.2586                            | -26.3797                             | -28.218                              |
| 8                      | 105->108                      | 0.6043                      | 5.2237                                        | 237.35                                       | 0.3838                            | 7.4807                               | 11.6734                              |
| 9                      | 101->107                      | 0.62492                     | 5.4012                                        | 229.55                                       | 0.0132                            | 3.4708                               | 2.7389                               |
| 10                     | 103->108                      | 0.30185                     | 5.5045                                        | 225.24                                       | 0.0197                            | 1.4771                               | 1.566                                |
|                        | 104->108                      | -0.32214                    |                                               |                                              |                                   |                                      |                                      |
|                        | 106->109                      | 0.40261                     |                                               |                                              |                                   |                                      |                                      |
| 11                     | 103->108                      | 0.23383                     | 5.5885                                        | 221.86                                       | 0.1532                            | 16.7489                              | 17.2636                              |
|                        | 104->108                      | 0.48594                     |                                               |                                              |                                   |                                      |                                      |
|                        | 105->109                      | 0.22978                     |                                               |                                              |                                   |                                      |                                      |
|                        | 106->109                      | 0.23617                     |                                               |                                              |                                   |                                      |                                      |
| 12                     | 99->107                       | 0.57549                     | 5.7608                                        | 215.22                                       | 0.0324                            | 15.272                               | 16.278                               |
| 13                     | 99->107                       | -0.24287                    | 5.7942                                        | 213.98                                       | 0.0061                            | -2.4444                              | -2.8078                              |
|                        | 102->108                      | 0.55427                     |                                               |                                              |                                   |                                      |                                      |
| 14                     | 97->107                       | 0.56352                     | 5.9509                                        | 208.35                                       | 0.3095                            | -15.4672                             | -21.025                              |
|                        | 105->109                      | -0.30527                    |                                               |                                              |                                   |                                      |                                      |
| 15                     | 103->108                      | -0.30719                    | 6.0641                                        | 204.46                                       | 0.1873                            | -22.9817                             | -25.1486                             |
|                        | 105->109                      | -0.29835                    |                                               |                                              |                                   |                                      |                                      |
|                        | 106->109                      | 0.35942                     |                                               |                                              |                                   |                                      |                                      |
| 16                     | 95->107                       | 0.26036                     | 6.1330                                        | 202.16                                       | 0.0158                            | -2.8346                              | -3.0066                              |
|                        | 98->107                       | 0.37082                     |                                               |                                              |                                   |                                      |                                      |



|    |          |          |        |        |        |          |          |
|----|----------|----------|--------|--------|--------|----------|----------|
|    | 100->108 | -0.29273 |        |        |        |          |          |
| 17 | 103->108 | -0.36709 | 6.2136 | 199.54 | 0.2987 | -40.2533 | -45.2581 |
|    | 105->109 | 0.42081  |        |        |        |          |          |
|    | 106->109 | 0.25056  |        |        |        |          |          |
| 18 | 98->107  | 0.33791  | 6.3204 | 196.17 | 0.0684 | 16.9305  | 19.6422  |
|    | 100->108 | 0.34913  |        |        |        |          |          |
| 19 | 93->107  | 0.25363  | 6.4337 | 192.71 | 0.0237 | 8.5962   | 9.2468   |
|    | 100->108 | 0.24748  |        |        |        |          |          |
|    | 102->109 | -0.25931 |        |        |        |          |          |
|    | 104->109 | 0.28948  |        |        |        |          |          |
| 20 | 102->109 | 0.44458  | 6.4908 | 191.01 | 0.0051 | 0.8973   | 2.0762   |
|    | 104->109 | 0.25058  |        |        |        |          |          |
| 21 | 93->107  | 0.32394  | 6.5673 | 188.79 | 0.0100 | 12.3751  | 11.7348  |
|    | 94->107  | -0.22902 |        |        |        |          |          |
|    | 104->109 | -0.2343  |        |        |        |          |          |
| 22 | 93->107  | 0.27451  | 6.6431 | 186.64 | 0.0048 | -7.2344  | -7.5223  |
|    | 103->109 | 0.2909   |        |        |        |          |          |
|    | 105->110 | -0.22466 |        |        |        |          |          |
| 23 | 94->107  | -0.26296 | 6.7159 | 184.61 | 0.0082 | -8.4293  | -7.3216  |
|    | 103->109 | 0.38863  |        |        |        |          |          |
| 24 | 104->109 | 0.29853  | 6.8044 | 182.21 | 0.3791 | 28.2323  | 27.7406  |
|    | 106->110 | 0.46477  |        |        |        |          |          |
| 25 | 95->107  | 0.23424  | 6.8499 | 181.00 | 0.0852 | -21.1878 | -23.1124 |
|    | 102->109 | 0.23359  |        |        |        |          |          |
|    | 106->110 | -0.231   |        |        |        |          |          |
| 26 | 91->107  | 0.28566  | 6.8764 | 180.31 | 0.0690 | 30.512   | 33.4431  |
|    | 92->107  | 0.22558  |        |        |        |          |          |
|    | 96->107  | 0.27354  |        |        |        |          |          |
| 27 | 101->108 | 0.5981   | 6.9042 | 179.58 | 0.0493 | 22.5347  | 25.3029  |
| 28 | 92->107  | -0.31225 | 6.9172 | 179.24 | 0.0737 | 19.0991  | 14.1603  |
|    | 96->107  | -0.24095 |        |        |        |          |          |
|    | 103->109 | 0.23992  |        |        |        |          |          |
|    | 105->110 | 0.34761  |        |        |        |          |          |
| 29 | 94->107  | 0.23241  | 6.9467 | 178.48 | 0.0070 | 7.6493   | 12.1678  |
|    | 95->107  | 0.23018  |        |        |        |          |          |
|    | 105->110 | 0.36008  |        |        |        |          |          |
| 30 | 91->107  | 0.23426  | 7.0817 | 175.08 | 0.0018 | -1.1592  | -2.2361  |
|    | 100->109 | 0.39669  |        |        |        |          |          |
|    | 102->110 | 0.32583  |        |        |        |          |          |
| 31 | 92->107  | -0.26976 | 7.1790 | 172.70 | 0.0014 | 6.0185   | 5.725    |
|    | 95->107  | -0.27133 |        |        |        |          |          |
|    | 96->107  | 0.24867  |        |        |        |          |          |
|    | 100->109 | 0.36166  |        |        |        |          |          |

|    |          |          |        |        |        |          |          |
|----|----------|----------|--------|--------|--------|----------|----------|
| 32 | 100->109 | -0.27945 | 7.2128 | 171.89 | 0.0017 | -4.5843  | -3.3784  |
|    | 102->110 | 0.45379  |        |        |        |          |          |
| 33 | 104->110 | 0.5161   | 7.2427 | 171.18 | 0.0940 | -38.3385 | -42.7018 |
| 34 | 89->107  | 0.38315  | 7.2982 | 169.88 | 0.0104 | -9.4468  | -11.8005 |
|    | 99->108  | 0.36587  |        |        |        |          |          |
| 35 | 89->107  | 0.34448  | 7.3218 | 169.33 | 0.1095 | 43.7309  | 49.4117  |
|    | 97->108  | -0.24147 |        |        |        |          |          |
|    | 99->108  | -0.28138 |        |        |        |          |          |
|    | 103->110 | 0.2845   |        |        |        |          |          |
| 36 | 99->108  | 0.25931  | 7.4074 | 167.38 | 0.0373 | -3.1809  | -2.9737  |
|    | 103->110 | 0.41793  |        |        |        |          |          |

<sup>a</sup>Number of the excited states; <sup>b</sup>Only transitions with contribution over 10.0% were listed; <sup>c</sup>Configuration-interaction coefficient; <sup>d</sup>Excitation energy; <sup>e</sup>Wavelength; <sup>f</sup>Oscillator strength; <sup>g</sup>Rotatory strength in velocity form ( $10^{-40}$  cgs); <sup>h</sup>Rotatory strength in length form ( $10^{-40}$  cgs).

**Table S11.** Key transitions, oscillator strengths, and rotatory strengths in the ECD spectrum of conformer cpd-1A-2 at the CAM-B3LYP/Def2SVP level of theory in MeOH with IEFPCM solvent model.

| <i>Num<sup>a</sup></i> | <i>Transition<sup>b</sup></i> | <i>CI-coeff<sup>b</sup></i> | <i><math>\Delta E</math> (eV)<sup>d</sup></i> | <i><math>\lambda</math> (nm)<sup>e</sup></i> | <i><math>f^f</math></i> | <i><math>R_{vel}^g</math></i> | <i><math>R_{len}^h</math></i> |
|------------------------|-------------------------------|-----------------------------|-----------------------------------------------|----------------------------------------------|-------------------------|-------------------------------|-------------------------------|
| 1                      | 105->107                      | 0.26308                     | 3.2631                                        | 379.96                                       | 0.3314                  | -13.0571                      | -13.567                       |
|                        | 106->107                      | 0.63364                     |                                               |                                              |                         |                               |                               |
| 2                      | 100->107                      | -0.30068                    | 3.4097                                        | 363.63                                       | 0.0003                  | -0.3489                       | -0.848                        |
|                        | 102->107                      | 0.57013                     |                                               |                                              |                         |                               |                               |
| 3                      | 105->107                      | 0.6267                      | 3.5989                                        | 344.50                                       | 0.0170                  | 18.6701                       | 19.3401                       |
|                        | 106->107                      | -0.26912                    |                                               |                                              |                         |                               |                               |
| 4                      | 100->107                      | 0.56362                     | 3.7539                                        | 330.28                                       | 0.0001                  | 0.923                         | 0.963                         |
|                        | 102->107                      | 0.28855                     |                                               |                                              |                         |                               |                               |
|                        | 102->108                      | -0.24554                    |                                               |                                              |                         |                               |                               |
| 5                      | 104->107                      | 0.66288                     | 3.9307                                        | 315.43                                       | 0.0585                  | 8.2358                        | 8.2811                        |
| 6                      | 103->107                      | 0.67589                     | 4.4944                                        | 275.87                                       | 0.2620                  | -3.3656                       | -3.7697                       |
| 7                      | 106->108                      | 0.62515                     | 5.0941                                        | 243.39                                       | 0.2269                  | 25.6335                       | 26.7317                       |
| 8                      | 105->108                      | 0.59134                     | 5.2445                                        | 236.41                                       | 0.4141                  | 6.5656                        | 2.6981                        |
| 9                      | 101->107                      | 0.64309                     | 5.3837                                        | 230.29                                       | 0.0075                  | -11.9284                      | -11.2517                      |
| 10                     | 103->108                      | 0.29553                     | 5.5079                                        | 225.10                                       | 0.0089                  | -1.5039                       | -1.2128                       |
|                        | 104->108                      | -0.27088                    |                                               |                                              |                         |                               |                               |
|                        | 106->109                      | 0.45865                     |                                               |                                              |                         |                               |                               |
| 11                     | 104->108                      | 0.50894                     | 5.6146                                        | 220.82                                       | 0.1496                  | -19.4908                      | -19.2244                      |
|                        | 105->109                      | 0.24181                     |                                               |                                              |                         |                               |                               |
| 12                     | 99->107                       | 0.62857                     | 5.6777                                        | 218.37                                       | 0.0549                  | -14.186                       | -15.0421                      |
| 13                     | 102->108                      | 0.56821                     | 5.8150                                        | 213.21                                       | 0.0026                  | -3.4821                       | -3.3795                       |
| 14                     | 97->107                       | 0.51863                     | 5.9661                                        | 207.81                                       | 0.3905                  | 16.9542                       | 24.4437                       |
|                        | 105->109                      | -0.33244                    |                                               |                                              |                         |                               |                               |
| 15                     | 97->107                       | -0.31331                    | 6.0650                                        | 204.43                                       | 0.1354                  | 19.8757                       | 20.8804                       |

|    |          |          |        |        |        |          |          |
|----|----------|----------|--------|--------|--------|----------|----------|
|    | 103->108 | -0.29854 |        |        |        |          |          |
|    | 105->109 | -0.22449 |        |        |        |          |          |
|    | 106->109 | 0.3355   |        |        |        |          |          |
| 16 | 98->107  | 0.40551  | 6.1187 | 202.63 | 0.0083 | -1.0022  | -1.2839  |
|    | 100->108 | -0.28933 |        |        |        |          |          |
| 17 | 103->108 | -0.36877 | 6.2362 | 198.81 | 0.2096 | 42.4618  | 44.8903  |
|    | 105->109 | 0.43237  |        |        |        |          |          |
| 18 | 95->107  | 0.30064  | 6.3324 | 195.79 | 0.1778 | -22.4939 | -23.4108 |
|    | 98->107  | -0.23796 |        |        |        |          |          |
|    | 104->109 | -0.29033 |        |        |        |          |          |
| 19 | 100->108 | 0.3645   | 6.4035 | 193.62 | 0.0179 | -5.6631  | -7.0639  |
| 20 | 94->107  | -0.2803  | 6.5075 | 190.53 | 0.0033 | 0.0085   | -0.4568  |
|    | 102->109 | 0.37596  |        |        |        |          |          |
| 21 | 102->109 | -0.27533 | 6.5625 | 188.93 | 0.0118 | -6.5374  | -6.3731  |
|    | 104->109 | 0.36426  |        |        |        |          |          |
|    | 106->110 | -0.2288  |        |        |        |          |          |
| 22 | 93->107  | 0.30697  | 6.6495 | 186.46 | 0.0079 | -9.7519  | -10.4984 |
|    | 95->107  | -0.24286 |        |        |        |          |          |
|    | 100->108 | -0.26267 |        |        |        |          |          |
|    | 102->109 | -0.25104 |        |        |        |          |          |
| 23 | 103->109 | 0.5197   | 6.7318 | 184.18 | 0.0053 | 3.7071   | 3.3237   |
|    | 105->110 | -0.24713 |        |        |        |          |          |
| 24 | 104->109 | 0.25795  | 6.8230 | 181.71 | 0.2919 | -10.7924 | -8.8776  |
|    | 106->110 | 0.46967  |        |        |        |          |          |
| 25 | 91->107  | 0.3375   | 6.8803 | 180.20 | 0.0008 | 2.7942   | 2.6924   |
|    | 94->107  | 0.32215  |        |        |        |          |          |
|    | 100->109 | -0.25165 |        |        |        |          |          |
| 26 | 92->107  | -0.33477 | 6.8922 | 179.89 | 0.0823 | 6.4275   | 7.0449   |
|    | 96->107  | 0.40135  |        |        |        |          |          |
| 27 | 93->107  | 0.33729  | 6.9098 | 179.43 | 0.0845 | 2.564    | 4.5297   |
|    | 95->107  | 0.30212  |        |        |        |          |          |
|    | 96->107  | -0.29508 |        |        |        |          |          |
| 28 | 101->108 | 0.56175  | 6.9686 | 177.92 | 0.1061 | -2.8026  | -3.4663  |
|    | 105->110 | 0.22763  |        |        |        |          |          |
| 29 | 101->108 | -0.22804 | 6.9780 | 177.68 | 0.0561 | -24.8191 | -27.2245 |
|    | 103->109 | 0.27972  |        |        |        |          |          |
|    | 105->110 | 0.47887  |        |        |        |          |          |
| 30 | 91->107  | -0.33254 | 7.0640 | 175.52 | 0.0022 | 7.4719   | 8.6849   |
|    | 94->107  | 0.39529  |        |        |        |          |          |
| 31 | 91->107  | 0.33041  | 7.1321 | 173.84 | 0.0020 | 3.4754   | 3.7179   |
|    | 100->109 | 0.47792  |        |        |        |          |          |
|    | 102->110 | 0.22795  |        |        |        |          |          |
| 32 | 99->108  | 0.24934  | 7.2309 | 171.46 | 0.0045 | 3.9177   | 3.6093   |

|    |          |          |        |        |        |          |          |
|----|----------|----------|--------|--------|--------|----------|----------|
|    | 100->109 | -0.28965 |        |        |        |          |          |
|    | 102->110 | 0.42348  |        |        |        |          |          |
| 33 | 104->110 | 0.4606   | 7.2892 | 170.09 | 0.0377 | 43.4536  | 47.9988  |
| 34 | 89->107  | 0.32396  | 7.3318 | 169.10 | 0.0072 | 8.0142   | 9.4977   |
|    | 90->107  | 0.32203  |        |        |        |          |          |
|    | 99->108  | 0.36975  |        |        |        |          |          |
| 35 | 89->107  | 0.23321  | 7.3531 | 168.62 | 0.1299 | -19.3994 | -20.2727 |
|    | 90->107  | 0.23281  |        |        |        |          |          |
|    | 99->108  | -0.32063 |        |        |        |          |          |
|    | 104->110 | 0.33513  |        |        |        |          |          |
| 36 | 85->107  | 0.26586  | 7.4104 | 167.31 | 0.0050 | -8.0072  | -9.2087  |
|    | 88->107  | 0.25028  |        |        |        |          |          |
|    | 90->107  | -0.25549 |        |        |        |          |          |
|    | 92->107  | 0.22532  |        |        |        |          |          |

<sup>a</sup>Number of the excited states; <sup>b</sup>Only transitions with contribution over 10.0% were listed; <sup>c</sup>Configuration-interaction coefficient; <sup>d</sup>Excitation energy; <sup>e</sup>Wavelength; <sup>f</sup>Oscillator strength; <sup>g</sup>Rotatory strength in velocity form ( $10^{-40}$  cgs); <sup>h</sup>Rotatory strength in length form ( $10^{-40}$  cgs).

**Table S12.** Key transitions, oscillator strengths, and rotatory strengths in the ECD spectrum of conformer cpd-1A-3 at the CAM-B3LYP/Def2SVP level of theory in MeOH with IEFPCM solvent model.

| <i>Num<sup>a</sup></i> | <i>Transition<sup>b</sup></i> | <i>CI-coeff<sup>b</sup></i> | <i><math>\Delta E</math> (eV)<sup>d</sup></i> | <i><math>\lambda</math> (nm)<sup>e</sup></i> | <i><math>f^f</math></i> | <i><math>R_{vel}^g</math></i> | <i><math>R_{len}^h</math></i> |
|------------------------|-------------------------------|-----------------------------|-----------------------------------------------|----------------------------------------------|-------------------------|-------------------------------|-------------------------------|
| 1                      | 106->107                      | 0.67395                     | 3.2857                                        | 377.34                                       | 0.3590                  | 12.2934                       | 13.7014                       |
| 2                      | 100->107                      | -0.33002                    | 3.4311                                        | 361.36                                       | 0.0004                  | 1.0202                        | 1.9189                        |
|                        | 102->107                      | 0.57091                     |                                               |                                              |                         |                               |                               |
| 3                      | 105->107                      | 0.67332                     | 3.6628                                        | 338.50                                       | 0.0176                  | -13.7738                      | -14.5158                      |
| 4                      | 100->107                      | 0.54241                     | 3.7726                                        | 328.64                                       | 0.0005                  | 1.7778                        | 1.4435                        |
|                        | 102->107                      | 0.3152                      |                                               |                                              |                         |                               |                               |
|                        | 102->108                      | -0.26378                    |                                               |                                              |                         |                               |                               |
| 5                      | 103->107                      | -0.22899                    | 4.0067                                        | 309.45                                       | 0.0596                  | -9.5107                       | -8.9642                       |
|                        | 104->107                      | 0.61182                     |                                               |                                              |                         |                               |                               |
| 6                      | 103->107                      | 0.62692                     | 4.5985                                        | 269.62                                       | 0.2126                  | 9.0257                        | 10.4997                       |
| 7                      | 106->108                      | 0.63666                     | 4.9959                                        | 248.17                                       | 0.3535                  | -28.6263                      | -29.9136                      |
| 8                      | 105->108                      | 0.61606                     | 5.1815                                        | 239.28                                       | 0.2853                  | 8.4151                        | 10.6098                       |
| 9                      | 101->107                      | 0.54713                     | 5.4339                                        | 228.17                                       | 0.0187                  | -5.6166                       | -7.5886                       |
|                        | 104->108                      | -0.24979                    |                                               |                                              |                         |                               |                               |
| 10                     | 101->107                      | 0.33371                     | 5.4914                                        | 225.78                                       | 0.0816                  | 8.5567                        | 9.1245                        |
|                        | 104->108                      | 0.41164                     |                                               |                                              |                         |                               |                               |
|                        | 106->109                      | 0.29866                     |                                               |                                              |                         |                               |                               |
| 11                     | 103->108                      | 0.39529                     | 5.5821                                        | 222.11                                       | 0.1445                  | 14.2666                       | 14.6794                       |
|                        | 104->108                      | -0.30183                    |                                               |                                              |                         |                               |                               |
|                        | 106->109                      | 0.3409                      |                                               |                                              |                         |                               |                               |
| 12                     | 102->108                      | 0.5814                      | 5.7438                                        | 215.86                                       | 0.0010                  | 3.4324                        | 3.4917                        |

|    |          |          |        |        |        |          |          |
|----|----------|----------|--------|--------|--------|----------|----------|
| 13 | 99->107  | 0.61533  | 5.8144 | 213.24 | 0.0338 | 6.2687   | 7.3171   |
| 14 | 97->107  | 0.53889  | 6.0050 | 206.47 | 0.4132 | -30.849  | -34.0096 |
|    | 105->109 | -0.35109 |        |        |        |          |          |
| 15 | 97->107  | 0.2777   | 6.0765 | 204.04 | 0.1048 | -8.3842  | -10.5989 |
|    | 104->108 | 0.27033  |        |        |        |          |          |
|    | 105->109 | 0.33446  |        |        |        |          |          |
|    | 106->109 | -0.31583 |        |        |        |          |          |
| 16 | 98->107  | -0.29843 | 6.1379 | 202.00 | 0.0056 | -0.0095  | -0.3755  |
|    | 100->108 | 0.38374  |        |        |        |          |          |
| 17 | 103->108 | 0.40403  | 6.2171 | 199.42 | 0.2713 | -27.7682 | -30.1032 |
|    | 105->109 | -0.36472 |        |        |        |          |          |
|    | 106->109 | -0.30666 |        |        |        |          |          |
| 18 | 98->107  | 0.39173  | 6.3280 | 195.93 | 0.0778 | 21.9496  | 24.9457  |
|    | 100->108 | 0.33308  |        |        |        |          |          |
| 19 | 100->108 | 0.22399  | 6.4495 | 192.24 | 0.0346 | -12.4355 | -12.7762 |
|    | 104->109 | 0.31207  |        |        |        |          |          |
|    | 106->110 | -0.30909 |        |        |        |          |          |
| 20 | 102->109 | 0.45398  | 6.5232 | 190.07 | 0.0047 | 6.6088   | 6.7218   |
| 21 | 92->107  | 0.27138  | 6.5986 | 187.89 | 0.0251 | -4.54    | -5.3037  |
|    | 94->107  | 0.27466  |        |        |        |          |          |
|    | 105->110 | -0.26273 |        |        |        |          |          |
|    | 106->110 | -0.27085 |        |        |        |          |          |
| 22 | 92->107  | 0.29884  | 6.6736 | 185.78 | 0.0225 | 10.4575  | 10.6753  |
|    | 98->107  | 0.24765  |        |        |        |          |          |
|    | 105->110 | 0.3231   |        |        |        |          |          |
| 23 | 94->107  | -0.28636 | 6.7595 | 183.42 | 0.0325 | -1.3037  | -2.142   |
|    | 96->107  | 0.28974  |        |        |        |          |          |
|    | 102->109 | 0.27162  |        |        |        |          |          |
| 24 | 104->109 | 0.40874  | 6.7918 | 182.55 | 0.3872 | 24.1454  | 23.6434  |
|    | 105->110 | -0.30213 |        |        |        |          |          |
|    | 106->110 | 0.36847  |        |        |        |          |          |
| 25 | 93->107  | 0.41372  | 6.8369 | 181.34 | 0.0007 | -0.7716  | -0.9668  |
|    | 95->107  | -0.26277 |        |        |        |          |          |
|    | 102->110 | -0.22459 |        |        |        |          |          |
| 26 | 101->108 | 0.59985  | 6.8810 | 180.18 | 0.0805 | 36.8988  | 40.8347  |
| 27 | 93->107  | 0.26439  | 6.9398 | 178.66 | 0.0152 | 7.9597   | 8.2418   |
|    | 94->107  | 0.28784  |        |        |        |          |          |
|    | 95->107  | 0.32866  |        |        |        |          |          |
|    | 98->107  | -0.25586 |        |        |        |          |          |
| 28 | 91->107  | 0.3707   | 6.9649 | 178.01 | 0.0024 | -5.8004  | -6.0009  |
|    | 96->107  | 0.28475  |        |        |        |          |          |
| 29 | 103->109 | 0.59158  | 6.9994 | 177.14 | 0.1367 | 14.6648  | 16.1065  |
|    | 105->110 | -0.24451 |        |        |        |          |          |

|    |          |          |        |        |        |          |          |
|----|----------|----------|--------|--------|--------|----------|----------|
| 30 | 100->109 | -0.32616 | 7.0684 | 175.41 | 0.0006 | -2.7071  | -3.6776  |
|    | 102->110 | 0.40941  |        |        |        |          |          |
| 31 | 96->107  | 0.23416  | 7.2002 | 172.19 | 0.0029 | -4.5244  | -5.1044  |
|    | 99->108  | 0.2503   |        |        |        |          |          |
|    | 100->109 | 0.23259  |        |        |        |          |          |
|    | 104->110 | -0.24989 |        |        |        |          |          |
| 32 | 100->109 | 0.39436  | 7.2123 | 171.91 | 0.0037 | -5.6284  | -4.342   |
|    | 102->110 | 0.3454   |        |        |        |          |          |
| 33 | 100->109 | 0.23998  | 7.2292 | 171.50 | 0.0363 | -7.5056  | -12.1617 |
|    | 104->110 | 0.44201  |        |        |        |          |          |
| 34 | 89->107  | -0.25704 | 7.3292 | 169.16 | 0.0261 | -15.2511 | -15.3503 |
|    | 97->108  | 0.43574  |        |        |        |          |          |
|    | 99->108  | 0.29329  |        |        |        |          |          |
| 35 | 97->108  | -0.28847 | 7.3332 | 169.07 | 0.0652 | 27.3431  | 29.8849  |
|    | 99->108  | 0.38992  |        |        |        |          |          |
|    | 103->110 | -0.23215 |        |        |        |          |          |
|    | 104->110 | 0.25104  |        |        |        |          |          |
| 36 | 89->107  | 0.47393  | 7.4480 | 166.47 | 0.0327 | -6.6289  | -4.7828  |
|    | 103->110 | 0.38914  |        |        |        |          |          |

<sup>a</sup>Number of the excited states; <sup>b</sup>Only transitions with contribution over 10.0% were listed; <sup>c</sup>Configuration-interaction coefficient; <sup>d</sup>Excitation energy; <sup>e</sup>Wavelength; <sup>f</sup>Oscillator strength; <sup>g</sup>Rotatory strength in velocity form ( $10^{-40}$  cgs); <sup>h</sup>Rotatory strength in length form ( $10^{-40}$  cgs).

**Table S13.** Key transitions, oscillator strengths, and rotatory strengths in the ECD spectrum of conformer cpd-1A-4 at the CAM-B3LYP/Def2SVP level of theory in MeOH with IEFPCM solvent model.

| <i>Num<sup>a</sup></i> | <i>Transition<sup>b</sup></i> | <i>CI-coeff<sup>b</sup></i> | <i><math>\Delta E</math> (eV)<sup>d</sup></i> | <i><math>\lambda</math> (nm)<sup>e</sup></i> | <i><math>f^f</math></i> | <i><math>R_{vel}^g</math></i> | <i><math>R_{len}^h</math></i> |
|------------------------|-------------------------------|-----------------------------|-----------------------------------------------|----------------------------------------------|-------------------------|-------------------------------|-------------------------------|
| 1                      | 106->107                      | 0.66029                     | 3.3089                                        | 374.70                                       | 0.3301                  | -15.5495                      | -15.815                       |
| 2                      | 99->107                       | -0.30167                    | 3.4190                                        | 362.64                                       | 0.0000                  | -1.6151                       | -1.4186                       |
|                        | 101->107                      | 0.26056                     |                                               |                                              |                         |                               |                               |
|                        | 102->107                      | 0.52983                     |                                               |                                              |                         |                               |                               |
| 3                      | 105->107                      | 0.65536                     | 3.6479                                        | 339.88                                       | 0.0288                  | -8.9223                       | -8.2562                       |
| 4                      | 99->107                       | 0.55935                     | 3.7724                                        | 328.66                                       | 0.0003                  | 0.9853                        | 0.6071                        |
|                        | 102->107                      | 0.27515                     |                                               |                                              |                         |                               |                               |
|                        | 102->108                      | -0.22683                    |                                               |                                              |                         |                               |                               |
| 5                      | 104->107                      | 0.65311                     | 3.9434                                        | 314.41                                       | 0.0488                  | -6.9165                       | -7.1485                       |
| 6                      | 103->107                      | 0.65347                     | 4.5478                                        | 272.63                                       | 0.2667                  | 43.4548                       | 45.3461                       |
| 7                      | 106->108                      | 0.62743                     | 5.1113                                        | 242.57                                       | 0.3326                  | -21.874                       | -22.8647                      |
| 8                      | 105->108                      | 0.59669                     | 5.2532                                        | 236.01                                       | 0.3014                  | 13.5993                       | 12.9435                       |
| 9                      | 101->107                      | 0.59008                     | 5.2972                                        | 234.06                                       | 0.0113                  | -10.0692                      | -11.1071                      |
|                        | 102->107                      | -0.29265                    |                                               |                                              |                         |                               |                               |
| 10                     | 103->108                      | 0.38485                     | 5.5410                                        | 223.76                                       | 0.0353                  | -9.5005                       | -9.5647                       |
|                        | 106->109                      | 0.41906                     |                                               |                                              |                         |                               |                               |

|    |          |          |        |        |        |          |          |
|----|----------|----------|--------|--------|--------|----------|----------|
| 11 | 104->108 | 0.54374  | 5.5989 | 221.45 | 0.1766 | -10.0675 | -10.0479 |
|    | 106->109 | 0.23792  |        |        |        |          |          |
| 12 | 100->107 | 0.65221  | 5.8291 | 212.70 | 0.0171 | -7.4457  | -7.4602  |
| 13 | 102->108 | 0.54084  | 5.8384 | 212.36 | 0.0012 | 1.7435   | 1.3858   |
| 14 | 97->107  | 0.55137  | 5.9636 | 207.90 | 0.2744 | -1.4326  | -0.457   |
|    | 105->109 | -0.26928 |        |        |        |          |          |
| 15 | 103->108 | 0.29277  | 6.1152 | 202.75 | 0.2943 | 7.6255   | 7.6771   |
|    | 105->109 | 0.43135  |        |        |        |          |          |
|    | 106->109 | -0.26448 |        |        |        |          |          |
| 16 | 99->108  | 0.44587  | 6.1868 | 200.40 | 0.0280 | 2.2753   | 1.217    |
| 17 | 103->108 | 0.37065  | 6.2258 | 199.15 | 0.1459 | 39.9052  | 40.6881  |
|    | 105->109 | -0.30135 |        |        |        |          |          |
|    | 106->109 | -0.34006 |        |        |        |          |          |
| 18 | 96->107  | 0.34759  | 6.2891 | 197.14 | 0.2014 | -38.596  | -40.5494 |
|    | 97->107  | 0.25789  |        |        |        |          |          |
| 19 | 95->107  | 0.31234  | 6.4626 | 191.85 | 0.0077 | -0.3683  | -0.7012  |
|    | 102->109 | 0.32047  |        |        |        |          |          |
| 20 | 91->107  | 0.28012  | 6.4995 | 190.76 | 0.0018 | 2.3202   | 3.2224   |
|    | 98->107  | 0.3148   |        |        |        |          |          |
|    | 102->109 | 0.31678  |        |        |        |          |          |
| 21 | 104->109 | 0.4249   | 6.5702 | 188.71 | 0.0084 | 3.5665   | 2.9686   |
|    | 106->110 | -0.30622 |        |        |        |          |          |
| 22 | 93->107  | 0.39503  | 6.6821 | 185.55 | 0.0001 | -0.1642  | 0.0395   |
|    | 95->107  | 0.24148  |        |        |        |          |          |
|    | 99->108  | -0.26784 |        |        |        |          |          |
| 23 | 98->107  | -0.23212 | 6.7481 | 183.73 | 0.0091 | -4.3995  | -5.9702  |
|    | 103->109 | 0.38729  |        |        |        |          |          |
|    | 105->110 | -0.27776 |        |        |        |          |          |
| 24 | 101->108 | 0.53725  | 6.7694 | 183.15 | 0.0019 | -8.8649  | -9.5032  |
| 25 | 98->107  | 0.40758  | 6.7931 | 182.51 | 0.0095 | 8.8628   | 10.1785  |
|    | 102->109 | -0.28419 |        |        |        |          |          |
| 26 | 91->107  | -0.35381 | 6.8922 | 179.89 | 0.0256 | -11.01   | -11.2861 |
|    | 92->107  | 0.38236  |        |        |        |          |          |
|    | 99->109  | -0.22421 |        |        |        |          |          |
| 27 | 104->109 | 0.3609   | 6.8988 | 179.72 | 0.5892 | 103.0818 | 105.4043 |
|    | 106->110 | 0.49793  |        |        |        |          |          |
| 28 | 103->109 | 0.39886  | 6.9470 | 178.47 | 0.0083 | -57.2024 | -55.3764 |
|    | 105->110 | 0.46428  |        |        |        |          |          |
| 29 | 93->107  | -0.30691 | 7.0144 | 176.76 | 0.0064 | -8.223   | -5.6972  |
|    | 94->107  | 0.43754  |        |        |        |          |          |
| 30 | 92->107  | 0.35318  | 7.0645 | 175.50 | 0.0140 | -2.7275  | -4.7385  |
|    | 95->107  | 0.25076  |        |        |        |          |          |
|    | 96->107  | -0.25658 |        |        |        |          |          |

|    |          |          |        |        |        |         |         |
|----|----------|----------|--------|--------|--------|---------|---------|
| 31 | 99->109  | 0.46691  | 7.1333 | 173.81 | 0.0026 | -7.0051 | -7.2853 |
|    | 102->110 | 0.28728  |        |        |        |         |         |
| 32 | 99->109  | 0.26078  | 7.2683 | 170.58 | 0.0337 | -8.3159 | -4.3516 |
|    | 102->110 | -0.33093 |        |        |        |         |         |
|    | 104->110 | 0.3733   |        |        |        |         |         |
| 33 | 90->107  | -0.29913 | 7.2732 | 170.47 | 0.0317 | 13.4214 | 10.99   |
|    | 99->109  | -0.22705 |        |        |        |         |         |
|    | 102->110 | 0.30302  |        |        |        |         |         |
|    | 104->110 | 0.35067  |        |        |        |         |         |
| 34 | 90->107  | 0.52142  | 7.3178 | 169.43 | 0.1424 | 15.2071 | 14.3738 |
|    | 97->108  | -0.27802 |        |        |        |         |         |
|    | 104->110 | 0.29251  |        |        |        |         |         |
| 35 | 100->108 | 0.61866  | 7.3564 | 168.54 | 0.0007 | -5.0725 | -4.7369 |
| 36 | 85->107  | 0.42911  | 7.4623 | 166.15 | 0.0013 | -5.1565 | -4.7934 |

<sup>a</sup>Number of the excited states; <sup>b</sup>Only transitions with contribution over 10.0% were listed; <sup>c</sup>Configuration-interaction coefficient; <sup>d</sup>Excitation energy; <sup>e</sup>Wavelength; <sup>f</sup>Oscillator strength; <sup>g</sup>Rotatory strength in velocity form ( $10^{-40}$  cgs); <sup>h</sup>Rotatory strength in length form ( $10^{-40}$  cgs).

**Table S14.** Key transitions, oscillator strengths, and rotatory strengths in the ECD spectrum of conformer cpd-1A-5 at the CAM-B3LYP/Def2SVP level of theory in MeOH with IEFPCM solvent model.

| <i>Num<sup>a</sup></i> | <i>Transition<sup>b</sup></i> | <i>CI-coeff<sup>b</sup></i> | <i><math>\Delta E</math> (eV)<sup>d</sup></i> | <i><math>\lambda</math> (nm)<sup>e</sup></i> | <i><math>f^f</math></i> | <i><math>R_{vel}^g</math></i> | <i><math>R_{len}^h</math></i> |
|------------------------|-------------------------------|-----------------------------|-----------------------------------------------|----------------------------------------------|-------------------------|-------------------------------|-------------------------------|
| 1                      | 106->107                      | 0.67027                     | 3.2768                                        | 378.37                                       | 0.3321                  | 14.7987                       | 15.4596                       |
| 2                      | 100->107                      | -0.31305                    | 3.4044                                        | 364.18                                       | 0.0000                  | -2.0992                       | -1.85                         |
|                        | 102->107                      | 0.56662                     |                                               |                                              |                         |                               |                               |
| 3                      | 105->107                      | 0.66757                     | 3.6574                                        | 339.00                                       | 0.0195                  | -15.408                       | -15.9573                      |
| 4                      | 100->107                      | 0.55831                     | 3.7524                                        | 330.41                                       | 0.0000                  | -0.5717                       | -0.6335                       |
|                        | 102->107                      | 0.28713                     |                                               |                                              |                         |                               |                               |
|                        | 102->108                      | -0.24587                    |                                               |                                              |                         |                               |                               |
| 5                      | 104->107                      | 0.65543                     | 3.9461                                        | 314.19                                       | 0.0559                  | -6.1893                       | -6.9366                       |
| 6                      | 103->107                      | 0.63193                     | 4.5517                                        | 272.39                                       | 0.2648                  | -3.4328                       | -2.6567                       |
| 7                      | 106->108                      | 0.63636                     | 5.1077                                        | 242.74                                       | 0.3408                  | -19.5776                      | -19.8578                      |
| 8                      | 105->108                      | 0.61101                     | 5.2832                                        | 234.68                                       | 0.2766                  | 3.7171                        | 6.6566                        |
| 9                      | 103->108                      | 0.33355                     | 5.5253                                        | 224.39                                       | 0.0057                  | 2.2727                        | 1.8366                        |
|                        | 106->109                      | 0.46742                     |                                               |                                              |                         |                               |                               |
| 10                     | 101->107                      | 0.5512                      | 5.5569                                        | 223.12                                       | 0.0091                  | 0.8639                        | 1.1071                        |
| 11                     | 104->108                      | 0.55664                     | 5.5962                                        | 221.55                                       | 0.2047                  | 36.1839                       | 36.7388                       |
|                        | 105->109                      | 0.24311                     |                                               |                                              |                         |                               |                               |
| 12                     | 102->108                      | 0.56751                     | 5.7989                                        | 213.81                                       | 0.0009                  | -0.1068                       | -0.4392                       |
| 13                     | 99->107                       | 0.61626                     | 5.9430                                        | 208.62                                       | 0.0104                  | -13.1229                      | -14.0038                      |
| 14                     | 97->107                       | 0.58604                     | 5.9569                                        | 208.14                                       | 0.2854                  | 0.7057                        | -2.7082                       |
|                        | 105->109                      | -0.25921                    |                                               |                                              |                         |                               |                               |
| 15                     | 103->108                      | 0.29451                     | 6.1143                                        | 202.78                                       | 0.3883                  | -0.467                        | -1.9157                       |



|    |          |          |        |        |        |          |          |
|----|----------|----------|--------|--------|--------|----------|----------|
|    | 105->109 | 0.42311  |        |        |        |          |          |
|    | 106->109 | -0.24809 |        |        |        |          |          |
| 16 | 100->108 | 0.41276  | 6.1864 | 200.41 | 0.0126 | 9.0214   | 9.3255   |
| 17 | 103->108 | 0.38288  | 6.2287 | 199.05 | 0.2038 | -64.9352 | -67.5261 |
|    | 105->109 | -0.32554 |        |        |        |          |          |
|    | 106->109 | -0.34315 |        |        |        |          |          |
| 18 | 95->107  | 0.33792  | 6.3698 | 194.64 | 0.1301 | 28.7022  | 31.4044  |
|    | 96->107  | -0.30909 |        |        |        |          |          |
|    | 104->109 | 0.26011  |        |        |        |          |          |
| 19 | 92->107  | -0.22977 | 6.4335 | 192.72 | 0.0009 | -1.5937  | -1.5302  |
|    | 100->108 | -0.31445 |        |        |        |          |          |
|    | 102->109 | 0.36037  |        |        |        |          |          |
| 20 | 89->107  | -0.26732 | 6.5352 | 189.72 | 0.0008 | -1.215   | -0.8532  |
|    | 93->107  | 0.22569  |        |        |        |          |          |
|    | 102->109 | 0.37563  |        |        |        |          |          |
| 21 | 104->109 | 0.42304  | 6.5797 | 188.43 | 0.0132 | 9.7245   | 9.2093   |
|    | 106->110 | -0.26817 |        |        |        |          |          |
| 22 | 93->107  | 0.28585  | 6.6253 | 187.14 | 0.0009 | 1.6096   | 1.2545   |
|    | 98->107  | 0.37647  |        |        |        |          |          |
|    | 100->108 | -0.27656 |        |        |        |          |          |
| 23 | 103->109 | 0.45292  | 6.7722 | 183.08 | 0.0197 | -0.5846  | -0.7262  |
|    | 105->110 | -0.23247 |        |        |        |          |          |
| 24 | 93->107  | -0.35018 | 6.8123 | 182.00 | 0.0047 | -3.5143  | -3.8957  |
|    | 98->107  | 0.43498  |        |        |        |          |          |
| 25 | 92->107  | 0.36515  | 6.8597 | 180.74 | 0.0121 | 12.0195  | 12.8489  |
|    | 94->107  | 0.25195  |        |        |        |          |          |
| 26 | 104->109 | 0.35932  | 6.8954 | 179.81 | 0.5820 | -27.6806 | -30.9284 |
|    | 106->110 | 0.50503  |        |        |        |          |          |
| 27 | 103->109 | 0.33322  | 6.9580 | 178.19 | 0.0027 | 16.116   | 17.0206  |
|    | 105->110 | 0.53179  |        |        |        |          |          |
| 28 | 91->107  | -0.37604 | 7.0172 | 176.69 | 0.0005 | -1.4366  | -2.2209  |
|    | 94->107  | 0.39282  |        |        |        |          |          |
| 29 | 100->109 | 0.41024  | 7.0781 | 175.17 | 0.0007 | 2.3816   | 3.1846   |
|    | 102->110 | 0.30619  |        |        |        |          |          |
| 30 | 100->109 | -0.36044 | 7.1278 | 173.94 | 0.0034 | -2.4161  | -3.2658  |
|    | 101->108 | 0.38701  |        |        |        |          |          |
| 31 | 95->107  | 0.2497   | 7.1863 | 172.53 | 0.0013 | 0.9648   | 1.4581   |
|    | 96->107  | 0.26229  |        |        |        |          |          |
| 32 | 90->107  | 0.39331  | 7.2645 | 170.67 | 0.0146 | 1.9743   | 1.4355   |
|    | 104->110 | -0.36175 |        |        |        |          |          |
| 33 | 100->109 | -0.24561 | 7.2736 | 170.46 | 0.0019 | 3.5702   | 5.6405   |
|    | 101->108 | -0.32186 |        |        |        |          |          |
|    | 102->110 | 0.41991  |        |        |        |          |          |

|    |          |          |        |        |        |          |          |
|----|----------|----------|--------|--------|--------|----------|----------|
| 34 | 90->107  | 0.23723  | 7.3149 | 169.50 | 0.1963 | -43.2587 | -46.5912 |
|    | 97->108  | -0.24566 |        |        |        |          |          |
|    | 104->110 | 0.44592  |        |        |        |          |          |
| 35 | 89->107  | 0.3598   | 7.3530 | 168.62 | 0.0144 | 11.5157  | 12.9627  |
|    | 91->107  | 0.23857  |        |        |        |          |          |
| 36 | 99->108  | 0.49098  | 7.4804 | 165.75 | 0.0053 | -12.8755 | -9.907   |
|    | 103->110 | 0.24365  |        |        |        |          |          |

<sup>a</sup>Number of the excited states; <sup>b</sup>Only transitions with contribution over 10.0% were listed; <sup>c</sup>Configuration-interaction coefficient; <sup>d</sup>Excitation energy; <sup>e</sup>Wavelength; <sup>f</sup>Oscillator strength; <sup>g</sup>Rotatory strength in velocity form (10<sup>-40</sup> cgs); <sup>h</sup>Rotatory strength in length form (10<sup>-40</sup> cgs).

**Table S15.** Key transitions, oscillator strengths, and rotatory strengths in the ECD spectrum of conformer cpd-1A-6 at the CAM-B3LYP/Def2SVP level of theory in MeOH with IEFPCM solvent model.

| <i>Num<sup>a</sup></i> | <i>Transition<sup>b</sup></i> | <i>CI-coeff<sup>b</sup></i> | <i>ΔE (eV)<sup>d</sup></i> | <i>λ (nm)<sup>e</sup></i> | <i>f<sup>f</sup></i> | <i>R<sub>vel</sub><sup>g</sup></i> | <i>R<sub>len</sub><sup>h</sup></i> |
|------------------------|-------------------------------|-----------------------------|----------------------------|---------------------------|----------------------|------------------------------------|------------------------------------|
| 1                      | 105->107                      | 0.24701                     | 3.2768                     | 378.37                    | 0.3271               | -11.209                            | -11.7417                           |
|                        | 106->107                      | 0.63778                     |                            |                           |                      |                                    |                                    |
| 2                      | 100->107                      | -0.30272                    | 3.4129                     | 363.28                    | 0.0009               | -4.1488                            | -4.959                             |
|                        | 102->107                      | 0.58852                     |                            |                           |                      |                                    |                                    |
| 3                      | 105->107                      | 0.63426                     | 3.6143                     | 343.03                    | 0.0189               | 15.7171                            | 16.3194                            |
|                        | 106->107                      | -0.25373                    |                            |                           |                      |                                    |                                    |
| 4                      | 100->107                      | 0.56417                     | 3.7535                     | 330.32                    | 0.0003               | -1.1955                            | -1.1144                            |
|                        | 102->107                      | 0.29052                     |                            |                           |                      |                                    |                                    |
|                        | 102->108                      | -0.25238                    |                            |                           |                      |                                    |                                    |
| 5                      | 104->107                      | 0.66297                     | 3.9375                     | 314.88                    | 0.0570               | 9.2272                             | 8.9304                             |
| 6                      | 103->107                      | 0.66682                     | 4.5135                     | 274.69                    | 0.2597               | -10.0858                           | -10.9418                           |
| 7                      | 106->108                      | 0.62527                     | 5.1012                     | 243.05                    | 0.2320               | 17.7324                            | 18.8736                            |
| 8                      | 105->108                      | 0.59648                     | 5.2396                     | 236.63                    | 0.3929               | 1.2587                             | -2.6328                            |
| 9                      | 101->107                      | 0.59393                     | 5.4818                     | 226.17                    | 0.0048               | -6.2289                            | -5.266                             |
| 10                     | 101->107                      | 0.23676                     | 5.5259                     | 224.37                    | 0.0147               | 3.5317                             | 3.4878                             |
|                        | 103->108                      | 0.31426                     |                            |                           |                      |                                    |                                    |
|                        | 106->109                      | 0.44344                     |                            |                           |                      |                                    |                                    |
| 11                     | 104->108                      | 0.53749                     | 5.6068                     | 221.13                    | 0.1764               | -14.4905                           | -14.8985                           |
|                        | 105->109                      | 0.25702                     |                            |                           |                      |                                    |                                    |
| 12                     | 102->108                      | 0.56437                     | 5.8027                     | 213.67                    | 0.0009               | -3.0986                            | -3.0909                            |
| 13                     | 99->107                       | 0.61053                     | 5.9159                     | 209.58                    | 0.0162               | -2.3007                            | -2.021                             |
| 14                     | 97->107                       | 0.54943                     | 5.9597                     | 208.04                    | 0.3516               | 13.3938                            | 18.6802                            |
|                        | 105->109                      | -0.30827                    |                            |                           |                      |                                    |                                    |
| 15                     | 97->107                       | -0.24394                    | 6.0781                     | 203.98                    | 0.2078               | 15.3022                            | 16.9814                            |
|                        | 103->108                      | -0.31978                    |                            |                           |                      |                                    |                                    |
|                        | 105->109                      | -0.28678                    |                            |                           |                      |                                    |                                    |
|                        | 106->109                      | 0.33834                     |                            |                           |                      |                                    |                                    |
| 16                     | 98->107                       | -0.25678                    | 6.1803                     | 200.61                    | 0.0038               | 5.6132                             | 6.0828                             |

|    |          |          |        |        |        |          |          |
|----|----------|----------|--------|--------|--------|----------|----------|
|    | 99->107  | 0.22649  |        |        |        |          |          |
|    | 100->108 | 0.36624  |        |        |        |          |          |
| 17 | 103->108 | -0.37411 | 6.2279 | 199.08 | 0.2212 | 27.652   | 30.9655  |
|    | 105->109 | 0.42083  |        |        |        |          |          |
|    | 106->109 | 0.24099  |        |        |        |          |          |
|    |          |          |        |        |        |          |          |
| 18 | 95->107  | 0.30649  | 6.3305 | 195.85 | 0.1411 | -17.3132 | -20.3494 |
|    | 98->107  | 0.27957  |        |        |        |          |          |
|    | 104->109 | 0.25227  |        |        |        |          |          |
| 19 | 93->107  | 0.29633  | 6.4016 | 193.68 | 0.0136 | -5.926   | -5.617   |
|    | 98->107  | 0.23104  |        |        |        |          |          |
|    | 100->108 | 0.33928  |        |        |        |          |          |
| 20 | 96->107  | 0.22629  | 6.4819 | 191.28 | 0.0054 | -5.0364  | -5.9518  |
|    | 102->109 | 0.46602  |        |        |        |          |          |
| 21 | 95->107  | -0.29741 | 6.5747 | 188.58 | 0.0145 | -12.8472 | -12.3586 |
|    | 104->109 | 0.39422  |        |        |        |          |          |
| 22 | 93->107  | 0.33948  | 6.6488 | 186.47 | 0.0000 | 0.6111   | 0.7786   |
|    | 100->108 | -0.27614 |        |        |        |          |          |
| 23 | 103->109 | 0.48181  | 6.7282 | 184.28 | 0.0103 | 15.2459  | 13.8455  |
|    | 105->110 | -0.24384 |        |        |        |          |          |
| 24 | 93->107  | 0.22754  | 6.8255 | 181.65 | 0.0664 | -18.3441 | -17.7849 |
|    | 95->107  | 0.28231  |        |        |        |          |          |
|    | 96->107  | -0.27487 |        |        |        |          |          |
|    | 102->109 | 0.30804  |        |        |        |          |          |
| 25 | 104->109 | 0.28223  | 6.8525 | 180.93 | 0.4527 | 10.173   | 12.9634  |
|    | 106->110 | 0.51551  |        |        |        |          |          |
| 26 | 92->107  | 0.45666  | 6.8884 | 179.99 | 0.0119 | 1.3828   | 1.0836   |
|    | 94->107  | -0.23164 |        |        |        |          |          |
| 27 | 91->107  | 0.35078  | 6.9235 | 179.08 | 0.0256 | -25.0207 | -25.5384 |
|    | 98->107  | -0.29438 |        |        |        |          |          |
|    | 100->109 | 0.23009  |        |        |        |          |          |
| 28 | 103->109 | 0.26661  | 6.9541 | 178.29 | 0.0764 | -4.4175  | -5.9303  |
|    | 105->110 | 0.51245  |        |        |        |          |          |
| 29 | 101->108 | 0.60424  | 7.0384 | 176.15 | 0.0376 | -18.8745 | -20.2958 |
| 30 | 91->107  | -0.29108 | 7.1005 | 174.61 | 0.0031 | -2.4413  | -1.8134  |
|    | 100->109 | 0.43283  |        |        |        |          |          |
|    | 102->110 | 0.28403  |        |        |        |          |          |
| 31 | 92->107  | -0.22631 | 7.2121 | 171.91 | 0.0008 | -5.3323  | -5.1925  |
|    | 94->107  | -0.29367 |        |        |        |          |          |
|    | 100->109 | 0.38797  |        |        |        |          |          |
|    | 102->110 | -0.24477 |        |        |        |          |          |
| 32 | 94->107  | -0.3192  | 7.2570 | 170.85 | 0.0020 | 1.1168   | -0.0355  |
|    | 102->110 | 0.4366   |        |        |        |          |          |
| 33 | 90->107  | -0.37826 | 7.2867 | 170.15 | 0.0464 | 8.5633   | 9.0289   |

|    |          |          |        |        |        |         |         |
|----|----------|----------|--------|--------|--------|---------|---------|
|    | 104->110 | 0.46645  |        |        |        |         |         |
| 34 | 90->107  | 0.45999  | 7.3307 | 169.13 | 0.1429 | 7.0661  | 8.5187  |
|    | 97->108  | -0.27347 |        |        |        |         |         |
|    | 104->110 | 0.33294  |        |        |        |         |         |
| 35 | 103->110 | 0.53948  | 7.4403 | 166.64 | 0.0483 | -1.3503 | -4.4417 |
| 36 | 85->107  | 0.43748  | 7.4682 | 166.02 | 0.0003 | -0.7405 | -0.5459 |
|    | 93->107  | 0.22478  |        |        |        |         |         |

<sup>a</sup>Number of the excited states; <sup>b</sup>Only transitions with contribution over 10.0% were listed; <sup>c</sup>Configuration-interaction coefficient; <sup>d</sup>Excitation energy; <sup>e</sup>Wavelength; <sup>f</sup>Oscillator strength; <sup>g</sup>Rotatory strength in velocity form (10<sup>-40</sup> cgs); <sup>h</sup>Rotatory strength in length form (10<sup>-40</sup> cgs).

**Table S16.** Key transitions, oscillator strengths, and rotatory strengths in the ECD spectrum of conformer cpd-1A-7 at the CAM-B3LYP/Def2SVP level of theory in MeOH with IEFPCM solvent model.

| <i>Num<sup>a</sup></i> | <i>Transition<sup>b</sup></i> | <i>CI-coeff<sup>b</sup></i> | <i>ΔE (eV)<sup>d</sup></i> | <i>λ (nm)<sup>e</sup></i> | <i>f<sup>f</sup></i> | <i>R<sub>vel</sub><sup>g</sup></i> | <i>R<sub>len</sub><sup>h</sup></i> |
|------------------------|-------------------------------|-----------------------------|----------------------------|---------------------------|----------------------|------------------------------------|------------------------------------|
| 1                      | 106->107                      | 0.65704                     | 3.2803                     | 377.97                    | 0.3314               | 13.8785                            | 14.2309                            |
| 2                      | 100->107                      | -0.301                      | 3.4144                     | 363.12                    | 0.0002               | 0.7669                             | 1.4373                             |
|                        | 102->107                      | 0.58464                     |                            |                           |                      |                                    |                                    |
| 3                      | 105->107                      | 0.6515                      | 3.6414                     | 340.48                    | 0.0178               | -11.789                            | -12.2509                           |
| 4                      | 100->107                      | 0.56106                     | 3.7573                     | 329.98                    | 0.0003               | 1.0622                             | 0.7817                             |
|                        | 102->107                      | 0.29519                     |                            |                           |                      |                                    |                                    |
|                        | 102->108                      | -0.25213                    |                            |                           |                      |                                    |                                    |
| 5                      | 104->107                      | 0.65917                     | 3.9502                     | 313.87                    | 0.0580               | -5.4545                            | -5.7888                            |
| 6                      | 103->107                      | 0.66256                     | 4.5467                     | 272.69                    | 0.2691               | -4.2654                            | -3.2631                            |
| 7                      | 106->108                      | 0.63706                     | 5.1049                     | 242.87                    | 0.2916               | -15.5994                           | -16.1012                           |
| 8                      | 105->108                      | 0.6048                      | 5.2657                     | 235.46                    | 0.3491               | -4.4177                            | -1.4561                            |
| 9                      | 103->108                      | 0.35149                     | 5.5312                     | 224.15                    | 0.0124               | 5.1963                             | 4.639                              |
|                        | 106->109                      | 0.44871                     |                            |                           |                      |                                    |                                    |
| 10                     | 101->107                      | 0.64531                     | 5.5752                     | 222.39                    | 0.0050               | -1.6807                            | -1.6911                            |
| 11                     | 104->108                      | 0.54945                     | 5.6118                     | 220.94                    | 0.1748               | 21.3514                            | 21.4743                            |
|                        | 105->109                      | 0.24375                     |                            |                           |                      |                                    |                                    |
| 12                     | 102->108                      | 0.58411                     | 5.8084                     | 213.46                    | 0.0006               | -1.0181                            | -1.2408                            |
| 13                     | 98->107                       | 0.50394                     | 5.9632                     | 207.92                    | 0.2991               | 19.2568                            | 17.349                             |
| 14                     | 98->107                       | -0.24228                    | 6.0126                     | 206.21                    | 0.0415               | -20.3                              | -23.0191                           |
|                        | 99->107                       | 0.48921                     |                            |                           |                      |                                    |                                    |
|                        | 105->109                      | 0.23099                     |                            |                           |                      |                                    |                                    |
| 15                     | 103->108                      | 0.34356                     | 6.1156                     | 202.73                    | 0.3243               | -0.5571                            | -1.0961                            |
|                        | 105->109                      | 0.32706                     |                            |                           |                      |                                    |                                    |
|                        | 106->109                      | -0.322                      |                            |                           |                      |                                    |                                    |
| 16                     | 100->108                      | 0.3381                      | 6.2324                     | 198.94                    | 0.0671               | -88.4622                           | -90.5444                           |
|                        | 103->108                      | -0.24279                    |                            |                           |                      |                                    |                                    |
|                        | 105->109                      | 0.26157                     |                            |                           |                      |                                    |                                    |
| 17                     | 100->108                      | -0.29822                    | 6.2581                     | 198.12                    | 0.2019               | 64.2289                            | 66.5402                            |

|    |          |          |        |        |        |          |          |
|----|----------|----------|--------|--------|--------|----------|----------|
|    | 103->108 | -0.27032 |        |        |        |          |          |
|    | 105->109 | 0.30679  |        |        |        |          |          |
| 18 | 95->107  | 0.32595  | 6.3884 | 194.08 | 0.0765 | -5.5218  | -5.7858  |
|    | 99->107  | 0.26637  |        |        |        |          |          |
|    | 104->109 | 0.23323  |        |        |        |          |          |
| 19 | 92->107  | 0.31266  | 6.4603 | 191.92 | 0.0003 | 0.8052   | 0.7321   |
|    | 102->109 | -0.30058 |        |        |        |          |          |
| 20 | 102->109 | 0.43696  | 6.5420 | 189.52 | 0.0027 | 1.4562   | 2.289    |
| 21 | 95->107  | -0.24992 | 6.6030 | 187.77 | 0.0099 | 6.6821   | 5.3423   |
|    | 104->109 | 0.36644  |        |        |        |          |          |
|    | 106->110 | -0.22836 |        |        |        |          |          |
| 22 | 92->107  | 0.24926  | 6.6980 | 185.11 | 0.0008 | -1.0366  | -1.065   |
|    | 93->107  | 0.4145   |        |        |        |          |          |
|    | 96->107  | -0.23056 |        |        |        |          |          |
|    | 100->108 | -0.27297 |        |        |        |          |          |
| 23 | 103->109 | 0.43445  | 6.7697 | 183.15 | 0.0343 | 0.3464   | 0.7074   |
|    | 105->110 | -0.26783 |        |        |        |          |          |
| 24 | 91->107  | 0.23494  | 6.8727 | 180.40 | 0.0330 | 16.1686  | 16.9869  |
|    | 94->107  | 0.31643  |        |        |        |          |          |
| 25 | 103->109 | -0.2753  | 6.8929 | 179.87 | 0.5072 | -32.2524 | -33.9266 |
|    | 104->109 | 0.3144   |        |        |        |          |          |
|    | 106->110 | 0.46907  |        |        |        |          |          |
| 26 | 103->109 | 0.31597  | 6.9600 | 178.14 | 0.0709 | 13.6488  | 13.2114  |
|    | 105->110 | 0.50552  |        |        |        |          |          |
| 27 | 90->107  | -0.27921 | 7.0260 | 176.47 | 0.0240 | 28.4157  | 27.8402  |
|    | 96->107  | -0.23527 |        |        |        |          |          |
|    | 97->107  | 0.30822  |        |        |        |          |          |
| 28 | 91->107  | 0.42249  | 7.0670 | 175.44 | 0.0006 | 1.571    | 1.0846   |
|    | 94->107  | -0.22572 |        |        |        |          |          |
|    | 101->108 | 0.27389  |        |        |        |          |          |
| 29 | 92->107  | 0.2483   | 7.0846 | 175.01 | 0.0006 | -0.2311  | 0.176    |
|    | 101->108 | 0.26525  |        |        |        |          |          |
|    | 102->110 | 0.24165  |        |        |        |          |          |
| 30 | 101->108 | 0.4784   | 7.1175 | 174.20 | 0.0080 | 4.2614   | 5.0041   |
| 31 | 96->107  | -0.24368 | 7.1508 | 173.38 | 0.0021 | -6.212   | -6.0848  |
|    | 97->107  | -0.30149 |        |        |        |          |          |
|    | 100->109 | 0.36377  |        |        |        |          |          |
|    | 102->110 | 0.22367  |        |        |        |          |          |
| 32 | 100->109 | -0.34508 | 7.2581 | 170.82 | 0.0015 | -4.3759  | -3.4574  |
|    | 102->110 | 0.47258  |        |        |        |          |          |
| 33 | 89->107  | -0.41454 | 7.2948 | 169.96 | 0.0448 | -12.8025 | -13.8428 |
|    | 104->110 | 0.46341  |        |        |        |          |          |
| 34 | 89->107  | 0.46349  | 7.3389 | 168.94 | 0.1604 | -13.9365 | -15.6084 |

|    |          |          |        |        |        |         |         |
|----|----------|----------|--------|--------|--------|---------|---------|
|    | 98->108  | -0.28374 |        |        |        |         |         |
|    | 104->110 | 0.35549  |        |        |        |         |         |
| 35 | 92->107  | -0.24867 | 7.4286 | 166.90 | 0.0031 | -4.208  | -3.9783 |
|    | 93->107  | 0.29844  |        |        |        |         |         |
|    | 94->107  | 0.27213  |        |        |        |         |         |
|    | 96->107  | 0.28958  |        |        |        |         |         |
| 36 | 103->110 | 0.54847  | 7.4646 | 166.10 | 0.0449 | 15.1745 | 17.4105 |

<sup>a</sup>Number of the excited states; <sup>b</sup>Only transitions with contribution over 10.0% were listed; <sup>c</sup>Configuration-interaction coefficient; <sup>d</sup>Excitation energy; <sup>e</sup>Wavelength; <sup>f</sup>Oscillator strength; <sup>g</sup>Rotatory strength in velocity form (10<sup>-40</sup> cgs); <sup>h</sup>Rotatory strength in length form (10<sup>-40</sup> cgs).

**Table S17.** Key transitions, oscillator strengths, and rotatory strengths in the ECD spectrum of conformer cpd-1A-8 at the CAM-B3LYP/Def2SVP level of theory in MeOH with IEFPCM solvent model.

| <i>Num<sup>a</sup></i> | <i>Transition<sup>b</sup></i> | <i>CI-coeff<sup>b</sup></i> | <i>ΔE (eV)<sup>d</sup></i> | <i>λ (nm)<sup>e</sup></i> | <i>f<sup>f</sup></i> | <i>R<sub>vel</sub><sup>g</sup></i> | <i>R<sub>len</sub><sup>h</sup></i> |
|------------------------|-------------------------------|-----------------------------|----------------------------|---------------------------|----------------------|------------------------------------|------------------------------------|
| 1                      | 105->107                      | 0.23689                     | 3.2705                     | 379.10                    | 0.3308               | 15.3055                            | 16.303                             |
|                        | 106->107                      | 0.6398                      |                            |                           |                      |                                    |                                    |
| 2                      | 100->107                      | -0.28918                    | 3.3941                     | 365.29                    | 0.0002               | 1.3427                             | 1.7434                             |
|                        | 102->107                      | 0.56844                     |                            |                           |                      |                                    |                                    |
| 3                      | 105->107                      | 0.63841                     | 3.6096                     | 343.49                    | 0.0271               | -23.2848                           | -24.1342                           |
|                        | 106->107                      | -0.2394                     |                            |                           |                      |                                    |                                    |
| 4                      | 100->107                      | 0.56559                     | 3.7381                     | 331.68                    | 0.0001               | 0.2931                             | 0.1365                             |
|                        | 102->107                      | 0.28748                     |                            |                           |                      |                                    |                                    |
|                        | 102->108                      | -0.24278                    |                            |                           |                      |                                    |                                    |
| 5                      | 104->107                      | 0.66237                     | 3.9129                     | 316.86                    | 0.0504               | -9.7042                            | -10.1315                           |
| 6                      | 103->107                      | 0.65968                     | 4.4874                     | 276.29                    | 0.2514               | 11.8287                            | 12.8751                            |
| 7                      | 106->108                      | 0.60511                     | 5.1017                     | 243.03                    | 0.2641               | -43.3996                           | -46.058                            |
| 8                      | 105->108                      | 0.59291                     | 5.2310                     | 237.02                    | 0.3360               | 24.9611                            | 29.3531                            |
| 9                      | 101->107                      | 0.62133                     | 5.3346                     | 232.41                    | 0.0162               | 3.5531                             | 2.5336                             |
| 10                     | 103->108                      | 0.35417                     | 5.5175                     | 224.71                    | 0.0066               | -0.3828                            | -0.4489                            |
|                        | 106->109                      | 0.48286                     |                            |                           |                      |                                    |                                    |
| 11                     | 104->108                      | 0.55841                     | 5.5751                     | 222.39                    | 0.1583               | 16.951                             | 17.2029                            |
|                        | 105->109                      | 0.26318                     |                            |                           |                      |                                    |                                    |
| 12                     | 99->107                       | 0.6257                      | 5.6279                     | 220.30                    | 0.0224               | 12.8017                            | 13.6124                            |
| 13                     | 102->108                      | 0.57532                     | 5.7990                     | 213.80                    | 0.0013               | -1.7948                            | -2.1026                            |
| 14                     | 97->107                       | 0.5575                      | 5.9216                     | 209.38                    | 0.3420               | -10.2535                           | -15.7881                           |
|                        | 105->109                      | -0.28851                    |                            |                           |                      |                                    |                                    |
| 15                     | 103->108                      | 0.25492                     | 6.0507                     | 204.91                    | 0.2150               | -13.9267                           | -18.2996                           |
|                        | 105->109                      | 0.38314                     |                            |                           |                      |                                    |                                    |
|                        | 106->109                      | -0.26799                    |                            |                           |                      |                                    |                                    |
| 16                     | 98->107                       | 0.38021                     | 6.1266                     | 202.37                    | 0.1009               | -8.9038                            | -7.6103                            |
|                        | 100->108                      | -0.23956                    |                            |                           |                      |                                    |                                    |
| 17                     | 103->108                      | 0.38323                     | 6.1923                     | 200.22                    | 0.2145               | -67.1457                           | -73.4851                           |

|    |          |          |        |        |        |          |          |
|----|----------|----------|--------|--------|--------|----------|----------|
|    | 105->109 | -0.34371 |        |        |        |          |          |
|    | 106->109 | -0.2887  |        |        |        |          |          |
| 18 | 96->107  | -0.26655 | 6.2656 | 197.88 | 0.0991 | 33.272   | 38.0929  |
|    | 98->107  | 0.23211  |        |        |        |          |          |
|    | 100->108 | 0.34246  |        |        |        |          |          |
| 19 | 96->107  | 0.23217  | 6.3991 | 193.75 | 0.0138 | 14.4211  | 14.5481  |
|    | 100->108 | 0.27327  |        |        |        |          |          |
|    | 102->109 | -0.24946 |        |        |        |          |          |
| 20 | 102->109 | 0.43986  | 6.4770 | 191.42 | 0.0096 | 2.1828   | 4.0182   |
|    | 104->109 | -0.25967 |        |        |        |          |          |
| 21 | 104->109 | 0.36509  | 6.5281 | 189.92 | 0.0132 | 13.1111  | 11.9909  |
| 22 | 93->107  | 0.38465  | 6.6481 | 186.49 | 0.0003 | -3.0396  | -2.8697  |
|    | 100->108 | -0.24278 |        |        |        |          |          |
|    | 103->109 | -0.23465 |        |        |        |          |          |
| 23 | 96->107  | -0.25205 | 6.6894 | 185.34 | 0.0016 | -6.1151  | -4.8921  |
|    | 103->109 | 0.45436  |        |        |        |          |          |
| 24 | 95->107  | -0.30747 | 6.7855 | 182.72 | 0.0740 | 11.1782  | 11.0438  |
|    | 96->107  | 0.31815  |        |        |        |          |          |
|    | 98->107  | 0.24165  |        |        |        |          |          |
|    | 106->110 | -0.25351 |        |        |        |          |          |
| 25 | 92->107  | -0.28678 | 6.8268 | 181.61 | 0.1554 | 35.2143  | 35.1495  |
|    | 94->107  | 0.2551   |        |        |        |          |          |
|    | 106->110 | 0.30559  |        |        |        |          |          |
| 26 | 106->110 | 0.32776  | 6.8329 | 181.45 | 0.1518 | -16.4599 | -18.8449 |
| 27 | 101->108 | 0.4953   | 6.8883 | 179.99 | 0.2541 | 9.1375   | 9.2684   |
|    | 105->110 | 0.27353  |        |        |        |          |          |
|    | 106->110 | 0.22578  |        |        |        |          |          |
| 28 | 101->108 | -0.25455 | 6.9029 | 179.61 | 0.0041 | 25.1948  | 23.1718  |
|    | 103->109 | 0.30509  |        |        |        |          |          |
|    | 105->110 | 0.43021  |        |        |        |          |          |
| 29 | 92->107  | 0.30307  | 6.9593 | 178.16 | 0.0028 | 5.6301   | 7.8658   |
|    | 93->107  | -0.23856 |        |        |        |          |          |
|    | 94->107  | 0.32701  |        |        |        |          |          |
| 30 | 100->109 | 0.4635   | 7.0694 | 175.38 | 0.0008 | -4.6387  | -5.0618  |
|    | 102->110 | 0.30358  |        |        |        |          |          |
| 31 | 89->107  | -0.24558 | 7.1202 | 174.13 | 0.0048 | 12.188   | 11.7319  |
|    | 93->107  | 0.22698  |        |        |        |          |          |
|    | 94->107  | 0.22681  |        |        |        |          |          |
|    | 95->107  | 0.27394  |        |        |        |          |          |
| 32 | 99->108  | 0.40036  | 7.1597 | 173.17 | 0.0005 | -1.4184  | -0.6049  |
|    | 100->109 | 0.30109  |        |        |        |          |          |
| 33 | 90->107  | -0.36256 | 7.2432 | 171.17 | 0.0433 | -15.5393 | -15.8987 |
|    | 104->110 | 0.45835  |        |        |        |          |          |

|    |          |          |        |        |        |          |          |
|----|----------|----------|--------|--------|--------|----------|----------|
| 34 | 90->107  | 0.31382  | 7.2875 | 170.13 | 0.0826 | -19.6616 | -19.4677 |
|    | 99->108  | -0.2658  |        |        |        |          |          |
|    | 102->110 | -0.24011 |        |        |        |          |          |
|    | 104->110 | 0.26474  |        |        |        |          |          |
| 35 | 90->107  | 0.23284  | 7.3016 | 169.80 | 0.0906 | 4.5722   | 3.1013   |
|    | 99->108  | 0.31503  |        |        |        |          |          |
|    | 102->110 | 0.28345  |        |        |        |          |          |
|    | 104->110 | 0.22649  |        |        |        |          |          |
| 36 | 89->107  | 0.42873  | 7.3411 | 168.89 | 0.0063 | -11.4503 | -11.6149 |
|    | 90->107  | -0.26733 |        |        |        |          |          |
|    | 95->107  | 0.23047  |        |        |        |          |          |

<sup>a</sup>Number of the excited states; <sup>b</sup>Only transitions with contribution over 10.0% were listed;

<sup>c</sup>Configuration-interaction coefficient; <sup>d</sup>Excitation energy; <sup>e</sup>Wavelength; <sup>f</sup>Oscillator strength;

<sup>g</sup>Rotatory strength in velocity form ( $10^{-40}$  cgs); <sup>h</sup>Rotatory strength in length form ( $10^{-40}$  cgs).

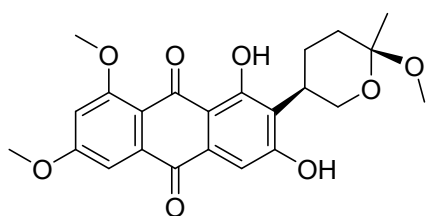

**2A**

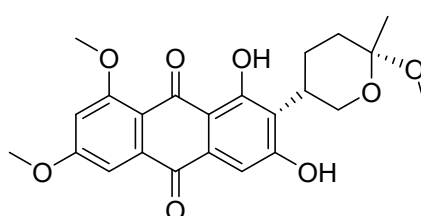

**2B**

**Table S18.** Experimental and calculated <sup>13</sup>C-NMR chemical shifts of cpd-2A

| No. | $\delta_{\text{exptl.}}$ | cpd-1A- $\delta_{\text{calcd.}}$ |
|-----|--------------------------|----------------------------------|
| 1   | 161.4                    | 159.9                            |
| 2   | 122.7                    | 121.9                            |
| 3   | 163.0                    | 156.9                            |
| 4   | 107.9                    | 107.8                            |
| 4a  | 132.1                    | 130.5                            |
| 5   | 104.0                    | 102.3                            |
| 6   | 165.0                    | 161.1                            |
| 7   | 105.1                    | 102.4                            |
| 8   | 164.0                    | 159.6                            |
| 8a  | 115.4                    | 115.2                            |
| 9   | 186.9                    | 182.4                            |
| 9a  | 110.8                    | 108.2                            |
| 10  | 183.1                    | 180.4                            |
| 10a | 137.5                    | 135.6                            |
| 11  | 56.8                     | 54.8                             |
| 12  | 56.1                     | 55.1                             |
| 1'  | 23.0                     | 22.4                             |
| 2'  | 98.6                     | 99.6                             |
| 3'  | 35.2                     | 34.7                             |



|    |      |      |
|----|------|------|
| 4' | 22.4 | 24.1 |
| 5' | 31.9 | 33.1 |
| 6' | 62.5 | 62.9 |
| 7' | 48.3 | 48.3 |

**Table S19.** Experimental and calculated  $^1\text{H-NMR}$  chemical shifts of cpd-2A

| No. | $\delta_{\text{exptl.}}$ | cpd-1A- $\delta_{\text{calcd.}}$ |
|-----|--------------------------|----------------------------------|
| 4   | 7.21                     | 7.46                             |
| 5   | 7.42                     | 7.53                             |
| 7   | 6.77                     | 6.82                             |
| 11  | 4.01                     | 3.83                             |
| 12  | 3.97                     | 3.91                             |
| 1'  | 1.45                     | 1.27                             |
| 3'  | 1.74                     | 1.57                             |
| 3'  | 1.86                     | 1.71                             |
| 4'  | 1.65                     | 1.69                             |
| 4'  | 2.62                     | 2.24                             |
| 5'  | 3.65                     | 3.65                             |
| 6'  | 3.63                     | 3.71                             |
| 6'  | 4.31                     | 3.91                             |
| 7'  | 3.39                     | 3.44                             |

**Table S20.** Conformational analysis of the B3LYP/6-31G(d) optimized conformers of cpd-2A in the gas phase (T=298.15 K)

| Conformer | $E^a$ (Hartree) | $C^b$ (Hartree) | $G^c$ (kcal/mol) | $\Delta G^d$ (kcal/mol) | Population $^e$ |
|-----------|-----------------|-----------------|------------------|-------------------------|-----------------|
| cpd-2A-1  | -1492.576002    | 0.379385        | -936353.377067   | 0.0                     | 49.63%          |
| cpd-2A-2  | -1492.573872    | 0.378384        | -936352.668707   | 0.70836                 | 15.00%          |
| cpd-2A-3  | -1492.571371    | 0.376043        | -936352.568169   | 0.808898                | 12.66%          |
| cpd-2A-4  | -1492.571342    | 0.376246        | -936352.422916   | 0.954151                | 9.91%           |
| cpd-2A-5  | -1492.573894    | 0.379327        | -936352.090993   | 1.286074                | 5.65%           |
| cpd-2A-6  | -1492.572434    | 0.378288        | -936351.826377   | 1.550691                | 3.62%           |
| cpd-2A-7  | -1492.571535    | 0.377411        | -936351.812841   | 1.564226                | 3.53%           |

<sup>a</sup>Electronic energy obtained at M062X/6-311+G(2d,p) level of theory; <sup>b</sup>Thermal correction to Gibbs free energy obtained at B3LYP/6-31G(d) level of theory; <sup>c</sup>Gibbs free energy ( $E + C$ ); <sup>d</sup>The relative Gibbs free energy; <sup>e</sup>The Boltzmann distribution of each conformer.

**Table S21.** Atomic coordinates ( $\text{\AA}$ ) of cpd-2A-1 obtained at the B3LYP/6-31G(d) level of theory in the gas phase.

|   |          |           |          |   |           |           |           |
|---|----------|-----------|----------|---|-----------|-----------|-----------|
| C | 0.647787 | 1.055151  | 0.054083 | O | -2.057001 | -2.904300 | 0.139333  |
| C | 1.836910 | 0.298107  | 0.127099 | O | 2.800414  | 1.938416  | 0.262974  |
| C | 1.734560 | -1.103161 | 0.191040 | O | 0.768799  | 2.389576  | -0.008637 |
| C | 0.480509 | -1.734952 | 0.179627 | H | -6.549960 | 1.093077  | -0.125498 |

|   |           |           |           |   |           |           |           |
|---|-----------|-----------|-----------|---|-----------|-----------|-----------|
| C | -0.675969 | -0.979709 | 0.108143  | H | -4.388112 | -2.616338 | 0.062624  |
| C | -4.427959 | -1.536516 | 0.021369  | H | 0.421332  | -2.815322 | 0.226834  |
| C | -5.622370 | -0.819665 | -0.035926 | H | 3.664465  | -1.474845 | 0.295710  |
| C | -5.599607 | 0.578601  | -0.083917 | H | 3.001981  | 2.070599  | 0.077284  |
| C | -4.390826 | 1.276206  | -0.078677 | H | -0.169696 | 2.742236  | -0.052427 |
| C | -3.154849 | 0.565505  | -0.024809 | H | 3.717507  | -0.419888 | -1.470659 |
| C | -1.843171 | 1.248109  | -0.024044 | H | 3.602995  | 1.257914  | -1.984366 |
| C | -0.627345 | 0.430598  | 0.046627  | H | 3.749115  | -0.279044 | 1.826885  |
| C | -1.981233 | -1.680481 | 0.094978  | H | 3.562398  | 1.410634  | 2.210640  |
| C | -3.219647 | -0.842571 | 0.027141  | H | 5.987414  | 0.516177  | 2.165189  |
| C | -5.560767 | 3.352906  | -0.163996 | H | 5.718563  | 1.963411  | 1.180638  |
| C | -6.942633 | -2.801401 | -0.005101 | H | 7.982574  | -0.197390 | 0.645929  |
| C | 7.457794  | 0.317812  | -0.163742 | H | 7.765774  | -0.105062 | -1.123080 |
| C | 5.953279  | 0.197504  | 0.026907  | H | 7.741282  | 1.373471  | -0.155481 |
| C | 5.458720  | 0.904581  | 1.288218  | H | 6.975309  | -2.365469 | -0.756108 |
| C | 3.949272  | 0.726335  | 1.448596  | H | 5.284640  | -2.933436 | -0.808595 |
| C | 3.179441  | 0.995636  | 0.125717  | H | 5.804319  | -1.590368 | -1.864959 |
| C | 3.939911  | 0.610133  | -1.171972 | H | -5.267674 | 4.403053  | -0.186992 |
| C | 5.931546  | -2.056837 | -0.882420 | H | -6.141515 | 3.114818  | -1.064042 |
| O | 5.356655  | 0.785117  | -1.113382 | H | -6.173891 | 3.162523  | 0.725829  |
| O | -1.756844 | 2.493015  | -0.082363 | H | -8.008053 | -3.033669 | -0.027483 |
| O | -6.856395 | -1.381064 | -0.049070 | H | -6.448281 | -3.256604 | -0.871506 |
| O | 5.528739  | -1.171537 | 0.164087  | H | -6.498543 | -3.198469 | 0.915412  |
| O | -4.343625 | 2.623439  | -0.121869 | - | -         | -         | -         |

**Table S22.** Atomic coordinates (Å) of cpd-2A-2 obtained at the B3LYP/6-31G(d) level of theory in the gas phase.

|   |           |           |           |   |           |           |           |
|---|-----------|-----------|-----------|---|-----------|-----------|-----------|
| C | 0.662902  | 1.085988  | -0.397492 | O | -1.958845 | -2.919205 | -0.207925 |
| C | 1.873560  | 0.362899  | -0.543662 | O | 2.846686  | -1.881968 | -0.620944 |
| C | 1.798619  | -1.043825 | -0.526443 | O | 0.753954  | 2.425954  | -0.377666 |
| C | 0.549909  | -1.691553 | -0.417177 | H | -6.495357 | 0.995126  | 0.360906  |
| C | -0.617552 | -0.967477 | -0.297834 | H | -4.281495 | -2.673345 | 0.034889  |
| C | -4.340206 | -1.594064 | 0.067207  | H | 0.519547  | -2.774150 | -0.419624 |
| C | -5.540547 | -0.899894 | 0.209486  | H | 3.717157  | -1.411386 | -0.590504 |
| C | -5.541273 | 0.498913  | 0.246867  | H | 2.812733  | 2.117411  | -1.218811 |
| C | -4.350731 | 1.219405  | 0.140179  | H | -0.190576 | 2.757471  | -0.278463 |
| C | -3.109178 | 0.532465  | -0.009193 | H | 3.960997  | 0.155035  | -2.393427 |
| C | -1.816142 | 1.240396  | -0.132793 | H | 4.989625  | 1.440512  | -1.735206 |
| C | -0.595429 | 0.444855  | -0.277075 | H | 2.821188  | 2.041444  | 1.314334  |
| C | -1.903389 | -1.693890 | -0.185020 | H | 4.316369  | 2.554328  | 0.551195  |
| C | -3.149924 | -0.877377 | -0.038776 | H | 3.722958  | -0.256460 | 1.652585  |
| C | -5.549811 | 3.272869  | 0.323524  | H | 4.834396  | 0.912477  | 2.362764  |
| C | -6.820540 | -2.906464 | 0.285052  | H | 7.430606  | 0.513421  | -0.351293 |

|   |           |           |           |   |           |           |           |
|---|-----------|-----------|-----------|---|-----------|-----------|-----------|
| C | 6.723379  | 0.916745  | 0.377881  | H | 6.408604  | 1.903991  | 0.031015  |
| C | 5.529737  | -0.023036 | 0.556800  | H | 7.232265  | 1.041680  | 1.338287  |
| C | 4.407011  | 0.565615  | 1.416040  | H | 6.898547  | -2.966356 | 1.035516  |
| C | 3.655368  | 1.690573  | 0.701645  | H | 6.766841  | -2.097569 | -0.516280 |
| C | 3.127290  | 1.221762  | -0.674225 | H | 7.909323  | -1.530483 | 0.740442  |
| C | 4.293920  | 0.634698  | -1.469429 | H | -5.276985 | 4.328757  | 0.321682  |
| C | 6.925997  | -1.983687 | 0.560644  | H | -6.235139 | 3.069780  | -0.509025 |
| O | 5.004647  | -0.387330 | -0.753486 | H | -6.044664 | 3.024016  | 1.270847  |
| O | -1.753708 | 2.489321  | -0.117076 | H | -7.876695 | -3.159315 | 0.386228  |
| O | -6.758977 | -1.484662 | 0.320250  | H | -6.437720 | -3.297525 | -0.665144 |
| O | 5.877528  | -1.231844 | 1.165900  | H | -6.254874 | -3.349750 | 1.113192  |
| O | -4.326971 | 2.567910  | 0.174281  | - | -         | -         | -         |

**Table S23.** Atomic coordinates (Å) of cpd-2A-3 obtained at the B3LYP/6-31G(d) level of theory in the gas phase.

|   |           |           |           |   |           |           |           |
|---|-----------|-----------|-----------|---|-----------|-----------|-----------|
| C | 0.645724  | 0.762559  | 0.105322  | O | -2.378996 | -2.958336 | 0.109027  |
| C | 1.772497  | -0.091741 | 0.158311  | O | 2.615018  | -2.304871 | 0.225119  |
| C | 1.534865  | -1.472178 | 0.182781  | O | 0.871418  | 2.082216  | 0.079261  |
| C | 0.238439  | -2.001074 | 0.161684  | H | -6.528937 | 1.398547  | -0.157108 |
| C | -0.853103 | -1.150376 | 0.109291  | H | -4.684487 | -2.478996 | 0.007022  |
| C | -4.633963 | -1.399112 | -0.017547 | H | 0.064374  | -3.073114 | 0.181465  |
| C | -5.764586 | -0.585047 | -0.080437 | H | 2.301096  | -3.222444 | 0.248695  |
| C | -5.624997 | 0.806810  | -0.108790 | H | 3.040737  | 1.594346  | 0.148133  |
| C | -4.362723 | 1.402451  | -0.075737 | H | -0.032036 | 2.513880  | 0.043413  |
| C | -3.190532 | 0.591254  | -0.012482 | H | 4.108615  | -0.958063 | -1.123040 |
| C | -1.827755 | 1.164232  | 0.021399  | H | 3.466058  | 0.465216  | -1.979264 |
| C | -0.680030 | 0.247155  | 0.080033  | H | 4.099724  | -0.919808 | 1.519768  |
| C | -2.209468 | -1.742582 | 0.081231  | H | 3.444990  | 0.508437  | 2.332097  |
| C | -3.373271 | -0.807324 | 0.015324  | H | 5.988519  | 0.528989  | 2.187836  |
| C | -5.355148 | 3.569434  | -0.168014 | H | 5.239486  | 1.922461  | 1.392088  |
| C | -7.243835 | -2.451454 | -0.095330 | H | 8.057322  | 1.089940  | 0.626609  |
| C | 7.333780  | 1.316671  | -0.162232 | H | 7.786490  | 1.107213  | -1.135054 |
| C | 6.068428  | 0.488496  | 0.038051  | H | 7.089688  | 2.381759  | -0.128443 |
| C | 5.352012  | 0.832540  | 1.349879  | H | 8.054589  | -1.249168 | -1.032773 |
| C | 3.977082  | 0.162475  | 1.438412  | H | 6.857363  | -2.562563 | -0.915682 |
| C | 3.160552  | 0.508351  | 0.176790  | H | 6.522672  | -1.141567 | -1.944504 |
| C | 3.973243  | 0.126478  | -1.071860 | H | -5.932193 | 3.382625  | -1.082224 |
| C | 6.980572  | -1.480285 | -1.008123 | H | -6.001719 | 3.427822  | 0.706941  |
| O | 5.243025  | 0.783467  | -1.082305 | H | -4.974842 | 4.591310  | -0.179050 |
| O | -1.639083 | 2.397362  | -0.000398 | H | -6.777650 | -2.934366 | -0.962301 |
| O | -7.039564 | -1.042568 | -0.118222 | H | -6.846498 | -2.895527 | 0.825042  |
| O | 6.341223  | -0.906432 | 0.120646  | H | -8.324404 | -2.593881 | -0.133890 |
| O | -4.203746 | 2.740482  | -0.102320 | - | -         | -         | -         |

**Table S24.** Atomic coordinates (Å) of cpd-2A-4 obtained at the B3LYP/6-31G(d) level of theory in the gas phase.

|   |           |           |           |   |           |           |           |
|---|-----------|-----------|-----------|---|-----------|-----------|-----------|
| C | -0.905617 | -0.106068 | 0.095043  | O | 2.908630  | -3.005557 | -0.135174 |
| C | -1.799468 | -1.200706 | 0.063851  | O | -2.103877 | -3.544250 | -0.043511 |
| C | -1.244553 | -2.485429 | -0.012492 | O | -1.430959 | 1.124544  | 0.163529  |
| C | 0.139513  | -2.695491 | -0.054625 | H | 5.919143  | 2.208149  | 0.034307  |
| C | 1.000481  | -1.611411 | -0.022374 | H | 5.038363  | -1.993768 | -0.141966 |
| C | 4.734893  | -0.957456 | -0.085272 | H | 0.560518  | -3.695049 | -0.113185 |
| C | 5.642462  | 0.101126  | -0.058866 | H | -1.585564 | -4.362255 | -0.097287 |
| C | 5.179596  | 1.419322  | 0.016263  | H | -3.751096 | -2.015447 | 0.053001  |
| C | 3.812641  | 1.698535  | 0.064883  | H | -0.652696 | 1.756235  | 0.178204  |
| C | 2.863944  | 0.632878  | 0.038611  | H | -3.415319 | 0.772194  | -1.117241 |
| C | 1.404780  | 0.866410  | 0.086131  | H | -3.585335 | -0.746084 | -2.032656 |
| C | 0.503956  | -0.295029 | 0.053644  | H | -3.367064 | 0.636013  | 1.511609  |
| C | 2.458180  | -1.865257 | -0.070016 | H | -3.500411 | -0.954231 | 2.274617  |
| C | 3.370224  | -0.681722 | -0.036922 | H | -5.713508 | 0.306462  | 2.222620  |
| C | 4.268376  | 4.037858  | 0.163157  | H | -5.783180 | -1.248352 | 1.377514  |
| C | 7.520478  | -1.358620 | -0.183785 | H | -7.630529 | 0.819064  | -1.044808 |
| C | -7.325137 | 0.371285  | -0.095431 | H | -7.643829 | -0.674494 | -0.098899 |
| C | -5.811598 | 0.452059  | 0.078142  | H | -7.824098 | 0.895229  | 0.725367  |
| C | -5.334513 | -0.247717 | 1.357438  | H | -6.684280 | 2.983946  | -0.889916 |
| C | -3.807596 | -0.357593 | 1.407650  | H | -4.989868 | 3.522716  | -0.778142 |
| C | -3.300868 | -1.020217 | 0.110401  | H | -5.423236 | 2.164462  | -1.853269 |
| C | -3.837811 | -0.235759 | -1.099012 | H | 4.879779  | 4.064475  | -0.747436 |
| C | -5.637353 | 2.649913  | -0.894237 | H | 3.658375  | 4.939923  | 0.219569  |
| O | -5.266675 | -0.177312 | -1.076133 | H | 4.923783  | 3.982725  | 1.041268  |
| O | 0.932825  | 2.019692  | 0.152131  | H | 8.604211  | -1.239427 | -0.210383 |
| O | 6.989457  | -0.039983 | -0.101635 | H | 7.237180  | -1.956240 | 0.690748  |
| O | -5.351284 | 1.792155  | 0.199040  | H | 7.183262  | -1.866270 | -1.095212 |
| O | 3.343797  | 2.960033  | 0.136563  | - | -         | -         | -         |

**Table S25.** Atomic coordinates (Å) of cpd-2A-5 obtained at the B3LYP/6-31G(d) level of theory in the gas phase.

|   |           |           |           |   |           |           |           |
|---|-----------|-----------|-----------|---|-----------|-----------|-----------|
| C | 0.661780  | 0.996499  | 0.059095  | O | -1.924135 | -3.041498 | 0.152293  |
| C | 1.871940  | 0.274130  | 0.130657  | O | 2.899796  | -1.933741 | 0.265845  |
| C | 1.810067  | -1.129693 | 0.195586  | O | 0.744301  | 2.333982  | -0.004933 |
| C | 0.574904  | -1.797141 | 0.187010  | H | -6.516028 | 0.870888  | -0.117114 |
| C | -0.603158 | -1.075888 | 0.116741  | H | -4.310770 | -2.814182 | 0.077314  |
| C | -4.336296 | -1.732582 | 0.035017  | H | 0.546489  | -2.878722 | 0.235209  |
| C | -5.554983 | -1.051333 | -0.022923 | H | 3.750139  | -1.445486 | 0.295539  |
| C | -5.574880 | 0.344203  | -0.074453 | H | 2.985464  | 2.079278  | 0.076361  |
| C | -4.374345 | 1.071580  | -0.071245 | H | -0.204359 | 2.659253  | -0.047480 |
| C | -3.124283 | 0.399672  | -0.016332 | H | 3.767488  | -0.391163 | -1.471581 |

|   |           |           |           |   |           |           |           |
|---|-----------|-----------|-----------|---|-----------|-----------|-----------|
| C | -1.833433 | 1.118796  | -0.016423 | H | 3.602942  | 1.282067  | -1.986514 |
| C | -0.595350 | 0.335554  | 0.053847  | H | 3.805991  | -0.246104 | 1.825561  |
| C | -1.886848 | -1.816972 | 0.106613  | H | 3.570954  | 1.437737  | 2.208625  |
| C | -3.149983 | -1.015726 | 0.038724  | H | 6.021146  | 0.615878  | 2.156040  |
| C | -5.599736 | 3.121456  | -0.162618 | H | 5.705830  | 2.052963  | 1.170048  |
| C | -7.937258 | -1.190389 | -0.082335 | H | 8.031796  | -0.039939 | 0.631855  |
| C | 7.489224  | 0.457195  | -0.177431 | H | 7.806429  | 0.040849  | -1.136637 |
| C | 5.989451  | 0.292879  | 0.018366  | H | 7.741550  | 1.520791  | -0.173077 |
| C | 5.478293  | 0.987021  | 1.280257  | H | 7.084791  | -2.238960 | -0.764277 |
| C | 3.975322  | 0.764398  | 1.445894  | H | 5.411795  | -2.857940 | -0.809550 |
| C | 3.193925  | 1.009894  | 0.125240  | H | 5.886941  | -1.501948 | -1.870327 |
| C | 3.961161  | 0.645169  | -1.174630 | H | -6.208934 | 2.922978  | 0.728592  |
| C | 6.031680  | -1.962382 | -0.887364 | H | -5.330043 | 4.177780  | -0.189309 |
| O | 5.372470  | 0.861034  | -1.120994 | H | -6.175991 | 2.869817  | -1.062333 |
| O | -1.781806 | 2.366225  | -0.074842 | H | -8.673172 | -1.995262 | -0.072667 |
| O | -6.668459 | -1.825399 | -0.024017 | H | -8.098461 | -0.538455 | 0.785628  |
| O | 5.606060  | -1.087608 | 0.158890  | H | -8.049513 | -0.604745 | -1.003653 |
| O | -4.367681 | 2.420077  | -0.118496 | - | -         | -         | -         |

**Table S26.** Atomic coordinates (Å) of cpd-2A-6 obtained at the B3LYP/6-31G(d) level of theory in the gas phase.

|   |           |           |           |   |           |           |           |
|---|-----------|-----------|-----------|---|-----------|-----------|-----------|
| C | 0.729662  | 1.090361  | -0.428908 | O | -1.924934 | -2.895907 | -0.311549 |
| C | 1.931476  | 0.360130  | -0.610047 | O | 2.884460  | -1.882695 | -0.790551 |
| C | 1.839611  | -1.043600 | -0.643386 | O | 0.834549  | 2.427790  | -0.374960 |
| C | 0.589557  | -1.685437 | -0.534687 | H | -6.417680 | 1.041173  | 0.429952  |
| C | -0.568834 | -0.954051 | -0.372416 | H | -4.242713 | -2.636599 | -0.025911 |
| C | -4.290682 | -1.558057 | 0.035639  | H | 0.548090  | -2.767033 | -0.572723 |
| C | -5.482472 | -0.857345 | 0.215165  | H | 3.751985  | -1.410899 | -0.742311 |
| C | -5.469934 | 0.539981  | 0.288396  | H | 2.894932  | 2.102394  | -1.282058 |
| C | -4.274752 | 1.252781  | 0.181650  | H | -0.104854 | 2.766250  | -0.254521 |
| C | -3.041788 | 0.559001  | -0.004078 | H | 4.047375  | 0.122892  | -2.429804 |
| C | -1.744788 | 1.258651  | -0.126776 | H | 5.069714  | 1.409270  | -1.769248 |
| C | -0.532344 | 0.456329  | -0.310024 | H | 2.864774  | 2.031522  | 1.254572  |
| C | -1.859441 | -1.672106 | -0.257844 | H | 4.369961  | 2.539468  | 0.508528  |
| C | -3.095817 | -0.849340 | -0.070321 | H | 3.742498  | -0.249124 | 1.610559  |
| C | -5.451865 | 3.311848  | 0.434488  | H | 4.867371  | 0.901182  | 2.326978  |
| C | -6.779320 | -2.854242 | 0.260775  | H | 7.232818  | 1.121812  | 1.324134  |
| C | 6.764430  | 0.947434  | 0.351966  | H | 7.499761  | 0.495198  | -0.317740 |
| C | 5.597900  | -0.020718 | 0.528210  | H | 6.450656  | 1.910395  | -0.056195 |
| C | 4.451201  | 0.552098  | 1.376088  | H | 5.273025  | -2.814399 | 0.188121  |
| C | 3.705724  | 1.678146  | 0.652957  | H | 5.986982  | -3.034816 | 1.805224  |
| C | 3.194718  | 1.206538  | -0.728616 | H | 4.424118  | -2.203294 | 1.630095  |
| C | 4.369936  | 0.607906  | -1.504810 | H | -5.934753 | 3.043655  | 1.382607  |

|   |           |           |           |   |           |           |           |
|---|-----------|-----------|-----------|---|-----------|-----------|-----------|
| C | 5.408215  | -2.357469 | 1.173654  | H | -5.168755 | 4.364783  | 0.454989  |
| O | 5.077643  | -0.411447 | -0.775468 | H | -6.151072 | 3.136166  | -0.392651 |
| O | -1.669340 | 2.505572  | -0.077566 | H | -6.415674 | -3.224539 | -0.705077 |
| O | -6.703813 | -1.434185 | 0.330538  | H | -6.204682 | -3.323136 | 1.068341  |
| O | 6.178096  | -1.162932 | 1.093814  | H | -7.836032 | -3.099873 | 0.372867  |
| O | -4.237934 | 2.599368  | 0.249344  | - | -         | -         | -         |

**Table S27.** Atomic coordinates (Å) of cpd-2A-7 obtained at the B3LYP/6-31G(d) level of theory in the gas phase.

|   |           |           |           |   |           |           |           |
|---|-----------|-----------|-----------|---|-----------|-----------|-----------|
| C | 0.597399  | 1.149440  | -0.105828 | O | -1.980926 | -2.894433 | -0.048802 |
| C | 1.812761  | 0.430746  | -0.146190 | O | 2.845742  | -1.768795 | -0.180130 |
| C | 1.755845  | -0.974564 | -0.148420 | O | 0.670379  | 2.489857  | -0.093543 |
| C | 0.519703  | -1.644480 | -0.109439 | H | -6.597722 | 0.964536  | 0.085825  |
| C | -0.660831 | -0.926829 | -0.074834 | H | -4.319352 | -2.678063 | 0.003982  |
| C | -4.393749 | -1.599294 | 0.012810  | H | 0.497688  | -2.727263 | -0.112648 |
| C | -5.610194 | -0.919407 | 0.046388  | H | 3.677169  | -1.260059 | -0.329457 |
| C | -5.631423 | 0.479644  | 0.058406  | H | 2.860189  | 2.258123  | -0.237456 |
| C | -4.445295 | 1.214799  | 0.035455  | H | -0.281399 | 2.809826  | -0.063984 |
| C | -3.187462 | 0.542438  | -0.001621 | H | 3.533957  | 0.530607  | -2.174548 |
| C | -1.897666 | 1.265835  | -0.032066 | H | 4.680287  | 1.729188  | -1.557694 |
| C | -0.657797 | 0.486151  | -0.073015 | H | 3.674790  | 0.021760  | 1.630970  |
| C | -1.943116 | -1.668060 | -0.044970 | H | 3.483428  | 1.738255  | 1.957245  |
| C | -3.207876 | -0.867824 | -0.010415 | H | 5.910236  | 1.095721  | 1.982950  |
| C | -5.681302 | 3.253818  | 0.083949  | H | 5.610085  | 2.162168  | 0.610131  |
| C | -6.867736 | -2.941634 | 0.055946  | H | 7.997934  | 0.618373  | 0.198636  |
| C | 7.230126  | 0.429708  | -0.558542 | H | 7.566488  | -0.373092 | -1.218929 |
| C | 5.907966  | 0.070047  | 0.111274  | H | 7.109641  | 1.333753  | -1.163424 |
| C | 5.375018  | 1.178385  | 1.032971  | H | 5.856401  | -2.483963 | -0.625181 |
| C | 3.866387  | 1.019956  | 1.226903  | H | 7.489826  | -2.266316 | 0.071989  |
| C | 3.117052  | 1.202926  | -0.124372 | H | 6.215383  | -3.077836 | 1.015593  |
| C | 4.075259  | 0.856092  | -1.283382 | H | -6.248934 | 3.012682  | 0.991610  |
| C | 6.415317  | -2.282930 | 0.294621  | H | -5.422625 | 4.313259  | 0.086940  |
| O | 4.944092  | -0.231129 | -0.937755 | H | -6.293501 | 3.028430  | -0.798405 |
| O | -1.852953 | 2.515022  | -0.024439 | H | -6.364951 | -3.362789 | 0.934645  |
| O | -6.826367 | -1.518742 | 0.069811  | H | -7.925494 | -3.206867 | 0.077092  |
| O | 5.987210  | -1.076397 | 0.919702  | H | -6.405372 | -3.343995 | -0.853257 |
| O | -4.441489 | 2.563838  | 0.046854  | - | -         | -         | -         |

**Table S28.** Key transitions, oscillator strengths, and rotatory strengths in the ECD spectrum of conformer cpd-2A-1 at the Cam-B3LYP/Def2SVP level of theory in acetonitrile with IEFPCM solvent model.

| <i>Num</i> <sup>a</sup> | <i>Transition</i> <sup>b</sup> | <i>CI-coeff</i> <sup>b</sup> | <i>ΔE (eV)</i> <sup>d</sup> | <i>λ (nm)</i> <sup>e</sup> | <i>f</i> <sup>f</sup> | <i>R<sub>vel</sub></i> <sup>g</sup> | <i>R<sub>len</sub></i> <sup>h</sup> |
|-------------------------|--------------------------------|------------------------------|-----------------------------|----------------------------|-----------------------|-------------------------------------|-------------------------------------|
| 1                       | 113->114                       | 0.69009                      | 3.1972                      | 387.78                     | 0.2464                | 0.1533                              | 0.0886                              |
| 2                       | 107->114                       | -0.38691                     | 3.4328                      | 361.18                     | 0.0000                | 0.115                               | 0.0391                              |
|                         | 109->114                       | 0.5429                       |                             |                            |                       |                                     |                                     |
| 3                       | 112->114                       | 0.67634                      | 3.7014                      | 334.97                     | 0.0404                | -0.1762                             | -0.1142                             |
| 4                       | 107->114                       | 0.51783                      | 3.7904                      | 327.10                     | 0.0001                | 0.8285                              | 0.7204                              |
|                         | 109->114                       | 0.36981                      |                             |                            |                       |                                     |                                     |
|                         | 109->115                       | -0.25398                     |                             |                            |                       |                                     |                                     |
| 5                       | 111->114                       | 0.64568                      | 3.8696                      | 320.41                     | 0.1159                | -2.3148                             | -2.0513                             |
| 6                       | 110->114                       | 0.65214                      | 4.4101                      | 281.13                     | 0.2445                | 0.0042                              | -0.0713                             |
| 7                       | 113->115                       | 0.65529                      | 5.0411                      | 245.95                     | 0.5738                | -0.7519                             | -0.6883                             |
| 8                       | 112->115                       | 0.61605                      | 5.3891                      | 230.07                     | 0.1838                | 0.645                               | 0.787                               |
| 9                       | 111->115                       | 0.45564                      | 5.4658                      | 226.84                     | 0.0209                | 1.4881                              | 1.2096                              |
|                         | 113->116                       | -0.36757                     |                             |                            |                       |                                     |                                     |
| 10                      | 110->115                       | 0.39169                      | 5.6065                      | 221.14                     | 0.1523                | 1.1987                              | 1.1277                              |
|                         | 111->115                       | -0.386                       |                             |                            |                       |                                     |                                     |
|                         | 113->116                       | -0.26815                     |                             |                            |                       |                                     |                                     |
| 11                      | 108->114                       | 0.66494                      | 5.7091                      | 217.17                     | 0.0177                | 0.496                               | 0.2119                              |
| 12                      | 109->115                       | 0.6028                       | 5.8429                      | 212.20                     | 0.0001                | -0.873                              | -0.8875                             |
| 13                      | 103->114                       | -0.24398                     | 5.9618                      | 207.96                     | 0.2276                | 1.6511                              | 1.2716                              |
|                         | 104->114                       | 0.54233                      |                             |                            |                       |                                     |                                     |
| 14                      | 102->114                       | -0.22805                     | 6.0980                      | 203.32                     | 0.1554                | -4.0765                             | -4.411                              |
|                         | 103->114                       | -0.25306                     |                             |                            |                       |                                     |                                     |
|                         | 112->116                       | 0.46276                      |                             |                            |                       |                                     |                                     |
| 15                      | 102->114                       | 0.25336                      | 6.1097                      | 202.93                     | 0.1971                | 0.5705                              | 1.1538                              |
|                         | 103->114                       | 0.27139                      |                             |                            |                       |                                     |                                     |
|                         | 110->115                       | 0.25255                      |                             |                            |                       |                                     |                                     |
|                         | 111->116                       | -0.23783                     |                             |                            |                       |                                     |                                     |
|                         | 113->116                       | 0.32247                      |                             |                            |                       |                                     |                                     |
| 16                      | 101->114                       | -0.231                       | 6.2553                      | 198.21                     | 0.0047                | 13.2371                             | 13.4465                             |
|                         | 105->114                       | -0.29112                     |                             |                            |                       |                                     |                                     |
|                         | 106->114                       | 0.33082                      |                             |                            |                       |                                     |                                     |
|                         | 107->115                       | 0.23686                      |                             |                            |                       |                                     |                                     |
| 17                      | 104->114                       | -0.24556                     | 6.2773                      | 197.51                     | 0.4862                | -14.4928                            | -15.2441                            |
|                         | 110->115                       | 0.36515                      |                             |                            |                       |                                     |                                     |
|                         | 111->116                       | 0.27575                      |                             |                            |                       |                                     |                                     |
|                         | 112->116                       | -0.32535                     |                             |                            |                       |                                     |                                     |
|                         | 113->116                       | 0.2559                       |                             |                            |                       |                                     |                                     |
| 18                      | 106->114                       | 0.5704                       | 6.4250                      | 192.97                     | 0.0002                | -0.1567                             | -0.4615                             |
|                         | 107->115                       | -0.3133                      |                             |                            |                       |                                     |                                     |

|    |          |          |        |        |        |          |          |
|----|----------|----------|--------|--------|--------|----------|----------|
| 19 | 100->114 | 0.24183  | 6.4569 | 192.02 | 0.0011 | -2.8876  | -2.8077  |
|    | 105->114 | 0.26716  |        |        |        |          |          |
|    | 107->115 | 0.34497  |        |        |        |          |          |
| 20 | 111->116 | 0.45656  | 6.4894 | 191.06 | 0.0132 | 2.4624   | 2.6967   |
|    | 112->116 | 0.23751  |        |        |        |          |          |
|    | 113->117 | -0.24559 |        |        |        |          |          |
| 21 | 109->116 | 0.59104  | 6.6752 | 185.74 | 0.0004 | -0.3985  | -0.2493  |
| 22 | 91->114  | -0.22676 | 6.7218 | 184.45 | 0.0021 | 2.6215   | 3.2785   |
|    | 100->114 | 0.46231  |        |        |        |          |          |
|    | 107->115 | -0.22705 |        |        |        |          |          |
| 23 | 110->116 | 0.53224  | 6.7239 | 184.39 | 0.0175 | -3.7743  | -4.4064  |
|    | 113->117 | 0.23712  |        |        |        |          |          |
| 24 | 101->114 | -0.27145 | 6.8452 | 181.13 | 0.0045 | 1.1627   | 1.2576   |
|    | 105->114 | 0.46406  |        |        |        |          |          |
| 25 | 113->117 | 0.52711  | 6.8642 | 180.62 | 0.3546 | 1.9486   | 2.2215   |
| 26 | 99->114  | 0.52015  | 6.9149 | 179.30 | 0.0002 | 1.5507   | 1.5343   |
|    | 107->116 | -0.26229 |        |        |        |          |          |
| 27 | 110->116 | 0.27764  | 7.0260 | 176.46 | 0.0538 | -2.1116  | -2.5338  |
|    | 111->117 | -0.2922  |        |        |        |          |          |
|    | 112->117 | 0.49433  |        |        |        |          |          |
| 28 | 101->114 | -0.28711 | 7.1126 | 174.32 | 0.0010 | -7.9423  | -7.2347  |
|    | 102->114 | 0.36026  |        |        |        |          |          |
|    | 103->114 | -0.33626 |        |        |        |          |          |
| 29 | 99->114  | 0.22932  | 7.1765 | 172.76 | 0.0001 | 1.5022   | 1.7189   |
|    | 107->116 | 0.5529   |        |        |        |          |          |
| 30 | 111->117 | 0.50002  | 7.2277 | 171.54 | 0.1793 | -13.2003 | -15.0165 |
|    | 112->117 | 0.3042   |        |        |        |          |          |
| 31 | 101->114 | 0.24805  | 7.3053 | 169.72 | 0.0062 | 6.9589   | 8.4522   |
|    | 109->117 | 0.45804  |        |        |        |          |          |
| 32 | 97->114  | 0.48428  | 7.3217 | 169.34 | 0.0112 | -7.4722  | -8.6239  |
|    | 108->115 | -0.32292 |        |        |        |          |          |
| 33 | 97->114  | 0.32998  | 7.3255 | 169.25 | 0.0361 | 15.1401  | 15.0374  |
|    | 108->115 | 0.53228  |        |        |        |          |          |
| 34 | 94->114  | 0.23009  | 7.3582 | 168.50 | 0.0014 | 3.8215   | 4.2951   |
|    | 101->114 | -0.24886 |        |        |        |          |          |
|    | 107->116 | -0.22791 |        |        |        |          |          |
|    | 109->117 | 0.27662  |        |        |        |          |          |
| 35 | 104->115 | -0.28511 | 7.4128 | 167.26 | 0.1638 | 0.0396   | 0.886    |
|    | 110->117 | 0.55883  |        |        |        |          |          |
| 36 | 91->114  | 0.32543  | 7.5712 | 163.76 | 0.0003 | 0.5778   | 0.5837   |
|    | 94->114  | 0.30998  |        |        |        |          |          |

<sup>a</sup>Number of the excited states; <sup>b</sup>Only transitions with contribution over 10.0% were listed; <sup>c</sup>Configuration-interaction coefficient; <sup>d</sup>Excitation energy; <sup>e</sup>Wavelength; <sup>f</sup>Oscillator strength;



<sup>g</sup>Rotatory strength in velocity form (10<sup>-40</sup> cgs); <sup>h</sup>Rotatory strength in length form (10<sup>-40</sup> cgs).

**Table S29.** Key transitions, oscillator strengths, and rotatory strengths in the ECD spectrum of conformer cpd-2A-2 at the Cam-B3LYP/Def2SVP level of theory in acetonitrile with IEFPCM solvent model.

| <i>Num</i> <sup>a</sup> | <i>Transition</i> <sup>b</sup> | <i>CI-coeff</i> <sup>b</sup> | <i>ΔE (eV)</i> <sup>d</sup> | <i>λ (nm)</i> <sup>e</sup> | <i>f</i> <sup>f</sup> | <i>R<sub>vel</sub></i> <sup>g</sup> | <i>R<sub>len</sub></i> <sup>h</sup> |
|-------------------------|--------------------------------|------------------------------|-----------------------------|----------------------------|-----------------------|-------------------------------------|-------------------------------------|
| 1                       | 113->114                       | 0.69184                      | 3.1731                      | 390.74                     | 0.2313                | -8.266                              | -7.3609                             |
| 2                       | 106->114                       | -0.39103                     | 3.4417                      | 360.24                     | 0.0000                | -0.0895                             | -0.303                              |
|                         | 109->114                       | 0.53422                      |                             |                            |                       |                                     |                                     |
| 3                       | 112->114                       | 0.67157                      | 3.7249                      | 332.85                     | 0.0331                | 14.4921                             | 13.7247                             |
| 4                       | 106->114                       | 0.49016                      | 3.8123                      | 325.22                     | 0.0009                | 4.1956                              | 4.5168                              |
|                         | 109->114                       | 0.37394                      |                             |                            |                       |                                     |                                     |
|                         | 109->115                       | -0.25379                     |                             |                            |                       |                                     |                                     |
| 5                       | 111->114                       | 0.63619                      | 3.8697                      | 320.40                     | 0.1298                | 3.0605                              | 2.6131                              |
| 6                       | 110->114                       | 0.64805                      | 4.4069                      | 281.34                     | 0.2445                | -10.0501                            | -11.2888                            |
| 7                       | 113->115                       | 0.65948                      | 4.9690                      | 249.51                     | 0.5805                | 17.7697                             | 19.4948                             |
| 8                       | 112->115                       | 0.61192                      | 5.3728                      | 230.76                     | 0.1774                | 5.0166                              | 4.8278                              |
| 9                       | 111->115                       | 0.50004                      | 5.4348                      | 228.13                     | 0.0363                | -7.1735                             | -7.9242                             |
|                         | 113->116                       | -0.32057                     |                             |                            |                       |                                     |                                     |
| 10                      | 110->115                       | 0.42073                      | 5.6120                      | 220.93                     | 0.1590                | -9.8616                             | -10.0033                            |
|                         | 111->115                       | -0.35101                     |                             |                            |                       |                                     |                                     |
|                         | 113->116                       | -0.27947                     |                             |                            |                       |                                     |                                     |
| 11                      | 108->114                       | 0.61442                      | 5.7893                      | 214.16                     | 0.0112                | -4.4817                             | -4.522                              |
| 12                      | 109->115                       | 0.56761                      | 5.8325                      | 212.57                     | 0.0015                | -4.506                              | -4.5492                             |
| 13                      | 103->114                       | -0.34477                     | 5.9696                      | 207.69                     | 0.2225                | -0.8787                             | 0.4958                              |
|                         | 104->114                       | -0.25847                     |                             |                            |                       |                                     |                                     |
|                         | 105->114                       | 0.43412                      |                             |                            |                       |                                     |                                     |
| 14                      | 103->114                       | 0.35442                      | 6.0777                      | 204.00                     | 0.0479                | -1.2951                             | -2.3985                             |
|                         | 105->114                       | 0.35776                      |                             |                            |                       |                                     |                                     |
|                         | 113->116                       | 0.25251                      |                             |                            |                       |                                     |                                     |
| 15                      | 112->116                       | 0.40539                      | 6.1041                      | 203.12                     | 0.2473                | 35.3262                             | 37.3501                             |
|                         | 113->116                       | 0.32843                      |                             |                            |                       |                                     |                                     |
| 16                      | 107->114                       | 0.65273                      | 6.2761                      | 197.55                     | 0.0120                | 7.4128                              | 7.7204                              |
| 17                      | 105->114                       | 0.23651                      | 6.2976                      | 196.88                     | 0.4533                | -43.5937                            | -42.5835                            |
|                         | 110->115                       | -0.33438                     |                             |                            |                       |                                     |                                     |
|                         | 111->116                       | -0.29311                     |                             |                            |                       |                                     |                                     |
|                         | 112->116                       | 0.35871                      |                             |                            |                       |                                     |                                     |
| 18                      | 102->114                       | 0.28089                      | 6.3331                      | 195.77                     | 0.0293                | 31.0085                             | 32.4997                             |
|                         | 106->115                       | 0.37616                      |                             |                            |                       |                                     |                                     |
| 19                      | 106->115                       | 0.27051                      | 6.4756                      | 191.46                     | 0.0025                | 4.2965                              | 3.7238                              |
|                         | 111->116                       | 0.28301                      |                             |                            |                       |                                     |                                     |
| 20                      | 102->114                       | 0.23093                      | 6.4852                      | 191.18                     | 0.0064                | -7.6577                             | -8.173                              |
|                         | 111->116                       | 0.33561                      |                             |                            |                       |                                     |                                     |

|    |          |          |        |        |        |          |          |
|----|----------|----------|--------|--------|--------|----------|----------|
|    | 113->117 | -0.22707 |        |        |        |          |          |
| 21 | 99->114  | 0.25049  | 6.7183 | 184.55 | 0.0006 | -0.2912  | 0.0359   |
|    | 109->116 | 0.54816  |        |        |        |          |          |
| 22 | 110->116 | 0.46291  | 6.7366 | 184.05 | 0.0673 | 2.9845   | 1.0015   |
|    | 113->117 | 0.36138  |        |        |        |          |          |
| 23 | 99->114  | 0.41048  | 6.7460 | 183.79 | 0.0027 | -3.8745  | -4.0914  |
|    | 106->115 | -0.30947 |        |        |        |          |          |
| 24 | 110->116 | -0.33512 | 6.8385 | 181.30 | 0.2500 | -16.3048 | -17.7074 |
|    | 112->117 | 0.23013  |        |        |        |          |          |
|    | 113->117 | 0.42152  |        |        |        |          |          |
| 25 | 98->114  | 0.50017  | 6.9318 | 178.86 | 0.0007 | -3.0587  | -3.0549  |
|    | 106->116 | -0.25487 |        |        |        |          |          |
| 26 | 103->114 | -0.26703 | 6.9701 | 177.88 | 0.0013 | -0.504   | -0.6467  |
|    | 104->114 | 0.51678  |        |        |        |          |          |
| 27 | 110->116 | 0.31859  | 7.0369 | 176.19 | 0.0742 | 0.1041   | 0.3514   |
|    | 111->117 | -0.32113 |        |        |        |          |          |
|    | 112->117 | 0.46105  |        |        |        |          |          |
| 28 | 106->116 | 0.31348  | 7.1949 | 172.32 | 0.1294 | -27.2982 | -24.8794 |
|    | 111->117 | 0.39799  |        |        |        |          |          |
|    | 112->117 | 0.26691  |        |        |        |          |          |
| 29 | 106->116 | 0.42899  | 7.2041 | 172.10 | 0.0668 | 21.2717  | 21.7415  |
|    | 111->117 | -0.28303 |        |        |        |          |          |
| 30 | 94->114  | -0.24955 | 7.2879 | 170.12 | 0.0087 | 18.9322  | 20.4321  |
|    | 109->117 | 0.48435  |        |        |        |          |          |
| 31 | 97->114  | 0.41778  | 7.3079 | 169.66 | 0.0265 | 5.224    | 5.6      |
|    | 100->114 | -0.32609 |        |        |        |          |          |
| 32 | 94->114  | -0.24838 | 7.3449 | 168.80 | 0.0074 | -2.0272  | -1.8363  |
|    | 97->114  | 0.36023  |        |        |        |          |          |
|    | 108->115 | -0.29311 |        |        |        |          |          |
| 33 | 108->115 | 0.43142  | 7.3606 | 168.44 | 0.0046 | 12.0495  | 10.7576  |
|    | 109->117 | -0.28435 |        |        |        |          |          |
| 34 | 105->115 | -0.25151 | 7.4038 | 167.46 | 0.1662 | -2.617   | -4.4694  |
|    | 110->117 | 0.55446  |        |        |        |          |          |
| 35 | 97->114  | 0.28375  | 7.4493 | 166.44 | 0.0080 | -3.3161  | -2.7185  |
|    | 100->114 | 0.46056  |        |        |        |          |          |
| 36 | 92->114  | 0.25713  | 7.5591 | 164.02 | 0.0001 | -0.2813  | -0.1524  |
|    | 101->114 | 0.35893  |        |        |        |          |          |

<sup>a</sup>Number of the excited states; <sup>b</sup>Only transitions with contribution over 10.0% were listed; <sup>c</sup>Configuration-interaction coefficient; <sup>d</sup>Excitation energy; <sup>e</sup>Wavelength; <sup>f</sup>Oscillator strength; <sup>g</sup>Rotatory strength in velocity form ( $10^{-40}$  cgs); <sup>h</sup>Rotatory strength in length form ( $10^{-40}$  cgs).

**Table S30.** Key transitions, oscillator strengths, and rotatory strengths in the ECD spectrum of conformer cpd-2A-3 at the Cam-B3LYP/Def2SVP level of theory in acetonitrile with IEFPCM solvent model.

| <i>Num</i> <sup>a</sup> | <i>Transition</i> <sup>b</sup> | <i>CI-coeff</i> <sup>b</sup> | <i>ΔE (eV)</i> <sup>d</sup> | <i>λ (nm)</i> <sup>e</sup> | <i>f</i> | <i>R<sub>ve</sub></i> <sup>g</sup> | <i>R<sub>ien</sub></i> <sup>h</sup> |
|-------------------------|--------------------------------|------------------------------|-----------------------------|----------------------------|----------|------------------------------------|-------------------------------------|
| 1                       | 113->114                       | 0.68516                      | 3.2031                      | 387.08                     | 0.2317   | 1.4278                             | 1.355                               |
| 2                       | 106->114                       | -0.38031                     | 3.4266                      | 361.82                     | 0.0000   | -0.2134                            | -0.2535                             |
|                         | 108->114                       | 0.28704                      |                             |                            |          |                                    |                                     |
|                         | 109->114                       | 0.46869                      |                             |                            |          |                                    |                                     |
| 3                       | 112->114                       | 0.65977                      | 3.6588                      | 338.87                     | 0.0660   | -1.9687                            | -1.9415                             |
| 4                       | 106->114                       | 0.52566                      | 3.7766                      | 328.29                     | 0.0000   | -0.1598                            | -0.176                              |
|                         | 109->114                       | 0.31552                      |                             |                            |          |                                    |                                     |
| 5                       | 111->114                       | 0.6444                       | 3.8443                      | 322.52                     | 0.1094   | -0.5799                            | -0.3944                             |
| 6                       | 110->114                       | 0.65056                      | 4.3854                      | 282.72                     | 0.2506   | 1.543                              | 1.8793                              |
| 7                       | 113->115                       | 0.6425                       | 5.0718                      | 244.46                     | 0.5719   | -0.9323                            | -0.9093                             |
| 8                       | 112->115                       | 0.59512                      | 5.3661                      | 231.05                     | 0.1747   | -1.3468                            | -1.3678                             |
| 9                       | 111->115                       | 0.46803                      | 5.4740                      | 226.50                     | 0.0171   | 2.5334                             | 2.5865                              |
|                         | 113->116                       | -0.32624                     |                             |                            |          |                                    |                                     |
| 10                      | 107->114                       | 0.44485                      | 5.5545                      | 223.22                     | 0.0096   | 4.3839                             | 4.3783                              |
|                         | 108->114                       | -0.38531                     |                             |                            |          |                                    |                                     |
|                         | 109->114                       | 0.24651                      |                             |                            |          |                                    |                                     |
| 11                      | 110->115                       | -0.37721                     | 5.5929                      | 221.68                     | 0.1393   | 0.0427                             | 0.0609                              |
|                         | 111->115                       | 0.37952                      |                             |                            |          |                                    |                                     |
|                         | 113->116                       | 0.28503                      |                             |                            |          |                                    |                                     |
| 12                      | 108->115                       | 0.29133                      | 5.8276                      | 212.76                     | 0.0001   | -1.4353                            | -1.4835                             |
|                         | 109->115                       | 0.51425                      |                             |                            |          |                                    |                                     |
| 13                      | 107->114                       | 0.48416                      | 5.9047                      | 209.98                     | 0.0003   | -0.0627                            | -0.0386                             |
|                         | 108->114                       | 0.4212                       |                             |                            |          |                                    |                                     |
|                         | 109->114                       | -0.22674                     |                             |                            |          |                                    |                                     |
| 14                      | 104->114                       | 0.5652                       | 5.9401                      | 208.73                     | 0.2212   | 1.0139                             | 0.4761                              |
| 15                      | 101->114                       | 0.29317                      | 6.0794                      | 203.94                     | 0.1395   | -1.7096                            | -1.949                              |
|                         | 112->116                       | 0.47771                      |                             |                            |          |                                    |                                     |
| 16                      | 101->114                       | 0.37336                      | 6.1326                      | 202.17                     | 0.1771   | -3.3495                            | -3.0275                             |
|                         | 110->115                       | -0.2497                      |                             |                            |          |                                    |                                     |
|                         | 111->116                       | 0.24844                      |                             |                            |          |                                    |                                     |
|                         | 113->116                       | -0.30461                     |                             |                            |          |                                    |                                     |
| 17                      | 105->114                       | 0.56398                      | 6.1417                      | 201.87                     | 0.0045   | 0.791                              | 0.9251                              |
| 18                      | 104->114                       | -0.24366                     | 6.2648                      | 197.90                     | 0.5052   | 1.5117                             | 1.0526                              |
|                         | 110->115                       | 0.37095                      |                             |                            |          |                                    |                                     |
|                         | 111->116                       | 0.31449                      |                             |                            |          |                                    |                                     |
|                         | 112->116                       | -0.25331                     |                             |                            |          |                                    |                                     |
|                         | 113->116                       | 0.275                        |                             |                            |          |                                    |                                     |
| 19                      | 105->114                       | 0.23552                      | 6.4133                      | 193.32                     | 0.0002   | 0.4567                             | 0.1461                              |
|                         | 106->115                       | 0.47568                      |                             |                            |          |                                    |                                     |

|    |          |          |        |        |        |         |         |
|----|----------|----------|--------|--------|--------|---------|---------|
| 20 | 101->114 | -0.23703 | 6.4819 | 191.28 | 0.0317 | -1.2164 | -0.9494 |
|    | 111->116 | 0.43153  |        |        |        |         |         |
|    | 112->116 | 0.30199  |        |        |        |         |         |
| 21 | 99->114  | 0.24573  | 6.5314 | 189.83 | 0.0004 | 1.0266  | 1.1326  |
|    | 102->114 | 0.26765  |        |        |        |         |         |
|    | 105->114 | -0.24276 |        |        |        |         |         |
|    | 109->116 | -0.26613 |        |        |        |         |         |
| 22 | 99->114  | 0.30245  | 6.6697 | 185.89 | 0.0001 | -0.6131 | -0.5437 |
|    | 108->116 | 0.24911  |        |        |        |         |         |
|    | 109->116 | 0.43055  |        |        |        |         |         |
| 23 | 110->116 | 0.56289  | 6.7101 | 184.77 | 0.0158 | -2.0191 | -1.9824 |
| 24 | 99->114  | -0.35549 | 6.7503 | 183.67 | 0.0001 | 0.9623  | 1.159   |
|    | 102->114 | 0.23864  |        |        |        |         |         |
|    | 106->115 | 0.35679  |        |        |        |         |         |
| 25 | 113->117 | 0.54664  | 6.8810 | 180.18 | 0.3843 | -8.4138 | -8.4348 |
| 26 | 98->114  | 0.54916  | 6.8978 | 179.74 | 0.0025 | 5.2995  | 5.4793  |
| 27 | 102->114 | -0.32828 | 6.9641 | 178.03 | 0.0312 | 6.9914  | 7.5836  |
|    | 103->114 | 0.49168  |        |        |        |         |         |
| 28 | 110->116 | 0.25438  | 7.0114 | 176.83 | 0.0136 | -5.6025 | -6.8943 |
|    | 111->117 | -0.31866 |        |        |        |         |         |
|    | 112->117 | 0.47689  |        |        |        |         |         |
| 29 | 106->116 | 0.51986  | 7.1411 | 173.62 | 0.0004 | 3.3158  | 3.8386  |
| 30 | 107->115 | 0.4509   | 7.1659 | 173.02 | 0.0023 | -2.7709 | -2.9217 |
|    | 108->115 | -0.37147 |        |        |        |         |         |
| 31 | 111->117 | 0.48767  | 7.1995 | 172.21 | 0.1737 | 4.9065  | 5.5405  |
|    | 112->117 | 0.3021   |        |        |        |         |         |
| 32 | 93->114  | 0.33507  | 7.2354 | 171.36 | 0.0006 | -2.6156 | -2.7069 |
|    | 106->116 | -0.23124 |        |        |        |         |         |
|    | 109->117 | -0.23712 |        |        |        |         |         |
| 33 | 97->114  | 0.62134  | 7.2982 | 169.88 | 0.0383 | -0.8909 | -1.3305 |
| 34 | 106->116 | -0.28469 | 7.3186 | 169.41 | 0.0005 | 0.5601  | 0.3412  |
|    | 108->117 | 0.25227  |        |        |        |         |         |
|    | 109->117 | 0.41712  |        |        |        |         |         |
| 35 | 104->115 | -0.27904 | 7.4056 | 167.42 | 0.1707 | 1.6052  | 2.4807  |
|    | 110->117 | 0.56123  |        |        |        |         |         |
| 36 | 90->114  | 0.44666  | 7.5386 | 164.46 | 0.0001 | -0.9286 | -0.8431 |

<sup>a</sup>Number of the excited states; <sup>b</sup>Only transitions with contribution over 10.0% were listed; <sup>c</sup>Configuration-interaction coefficient; <sup>d</sup>Excitation energy; <sup>e</sup>Wavelength; <sup>f</sup>Oscillator strength; <sup>g</sup>Rotatory strength in velocity form ( $10^{-40}$  cgs); <sup>h</sup>Rotatory strength in length form ( $10^{-40}$  cgs).

**Table S31.** Key transitions, oscillator strengths, and rotatory strengths in the ECD spectrum of conformer cpd-2A-4 at the Cam-B3LYP/Def2SVP level of theory in acetonitrile with IEFPCM solvent model.

| <i>Num</i> <sup>a</sup> | <i>Transition</i> <sup>b</sup> | <i>CI-coeff</i> <sup>b</sup> | <i>ΔE (eV)</i> <sup>d</sup> | <i>λ (nm)</i> <sup>e</sup> | <i>f</i> <sup>f</sup> | <i>R<sub>vel</sub></i> <sup>g</sup> | <i>R<sub>len</sub></i> <sup>h</sup> |
|-------------------------|--------------------------------|------------------------------|-----------------------------|----------------------------|-----------------------|-------------------------------------|-------------------------------------|
| 1                       | 113->114                       | 0.68563                      | 3.2036                      | 387.01                     | 0.2218                | -0.253                              | -0.215                              |
| 2                       | 106->114                       | -0.38343                     | 3.4220                      | 362.32                     | 0.0000                | 1.3941                              | 1.4099                              |
|                         | 109->114                       | 0.51815                      |                             |                            |                       |                                     |                                     |
| 3                       | 112->114                       | 0.65731                      | 3.6654                      | 338.26                     | 0.0646                | 0.5488                              | 0.3829                              |
| 4                       | 106->114                       | 0.51625                      | 3.7733                      | 328.58                     | 0.0000                | 0.0642                              | 0.1842                              |
|                         | 109->114                       | 0.34221                      |                             |                            |                       |                                     |                                     |
|                         | 109->115                       | -0.2375                      |                             |                            |                       |                                     |                                     |
| 5                       | 111->114                       | 0.64525                      | 3.8421                      | 322.70                     | 0.1112                | -1.429                              | -1.4677                             |
| 6                       | 110->114                       | 0.65089                      | 4.3840                      | 282.81                     | 0.2734                | -1.219                              | -1.4685                             |
| 7                       | 113->115                       | 0.64225                      | 5.0543                      | 245.30                     | 0.5717                | 1.601                               | 1.7433                              |
| 8                       | 112->115                       | 0.6012                       | 5.3462                      | 231.91                     | 0.1537                | -1.711                              | -1.7512                             |
| 9                       | 111->115                       | 0.48274                      | 5.4608                      | 227.05                     | 0.0230                | -3.3371                             | -3.3592                             |
|                         | 113->116                       | -0.2931                      |                             |                            |                       |                                     |                                     |
| 10                      | 107->114                       | -0.41588                     | 5.5357                      | 223.97                     | 0.0118                | 2.0431                              | 2.1003                              |
|                         | 108->114                       | 0.43973                      |                             |                            |                       |                                     |                                     |
| 11                      | 110->115                       | 0.38851                      | 5.5910                      | 221.76                     | 0.1287                | 0.2237                              | 0.23                                |
|                         | 111->115                       | -0.35942                     |                             |                            |                       |                                     |                                     |
|                         | 113->116                       | -0.30787                     |                             |                            |                       |                                     |                                     |
| 12                      | 109->115                       | 0.53808                      | 5.7885                      | 214.19                     | 0.0000                | 0.0059                              | 0.0993                              |
| 13                      | 107->114                       | 0.48798                      | 5.8643                      | 211.42                     | 0.0000                | -0.1074                             | -0.0726                             |
|                         | 108->114                       | 0.45163                      |                             |                            |                       |                                     |                                     |
| 14                      | 104->114                       | 0.56571                      | 5.9404                      | 208.71                     | 0.2013                | 1.0495                              | 1.4291                              |
| 15                      | 101->114                       | 0.27604                      | 6.0837                      | 203.80                     | 0.1043                | -5.5972                             | -5.6963                             |
|                         | 112->116                       | 0.46879                      |                             |                            |                       |                                     |                                     |
| 16                      | 101->114                       | 0.30542                      | 6.1355                      | 202.08                     | 0.0479                | -7.4321                             | -7.8976                             |
|                         | 105->114                       | 0.48782                      |                             |                            |                       |                                     |                                     |
| 17                      | 101->114                       | -0.23474                     | 6.1414                      | 201.88                     | 0.1009                | 13.857                              | 14.7165                             |
|                         | 105->114                       | 0.32408                      |                             |                            |                       |                                     |                                     |
|                         | 113->116                       | 0.26524                      |                             |                            |                       |                                     |                                     |
| 18                      | 104->114                       | -0.24064                     | 6.2665                      | 197.85                     | 0.5208                | -2.1693                             | -1.8571                             |
|                         | 110->115                       | 0.3628                       |                             |                            |                       |                                     |                                     |
|                         | 111->116                       | 0.33568                      |                             |                            |                       |                                     |                                     |
|                         | 112->116                       | -0.25461                     |                             |                            |                       |                                     |                                     |
|                         | 113->116                       | 0.26708                      |                             |                            |                       |                                     |                                     |
| 19                      | 105->114                       | 0.22406                      | 6.4048                      | 193.58                     | 0.0002                | -0.8631                             | -1.1497                             |
|                         | 106->115                       | 0.46713                      |                             |                            |                       |                                     |                                     |
| 20                      | 111->116                       | 0.41825                      | 6.4875                      | 191.11                     | 0.0475                | 2.2459                              | 2.0708                              |
|                         | 112->116                       | 0.31428                      |                             |                            |                       |                                     |                                     |
|                         | 113->117                       | -0.23242                     |                             |                            |                       |                                     |                                     |

|    |          |          |        |        |        |          |          |
|----|----------|----------|--------|--------|--------|----------|----------|
| 21 | 102->114 | 0.31077  | 6.5396 | 189.59 | 0.0015 | -2.9654  | -2.771   |
|    | 109->116 | 0.28841  |        |        |        |          |          |
| 22 | 99->114  | 0.31011  | 6.6624 | 186.10 | 0.0002 | -1.077   | -0.9539  |
|    | 109->116 | 0.45654  |        |        |        |          |          |
| 23 | 110->116 | 0.5476   | 6.7140 | 184.66 | 0.0216 | 0.9435   | 0.0468   |
|    | 113->117 | 0.2326   |        |        |        |          |          |
| 24 | 99->114  | 0.36081  | 6.7428 | 183.88 | 0.0024 | 5.1018   | 5.1754   |
|    | 102->114 | 0.28673  |        |        |        |          |          |
|    | 106->115 | -0.35381 |        |        |        |          |          |
| 25 | 98->114  | -0.22453 | 6.8776 | 180.27 | 0.3273 | -23.9275 | -25.3339 |
|    | 113->117 | 0.47446  |        |        |        |          |          |
| 26 | 98->114  | 0.4067   | 6.8840 | 180.11 | 0.0949 | 22.8914  | 24.5564  |
|    | 113->117 | 0.26997  |        |        |        |          |          |
| 27 | 98->114  | 0.29847  | 6.9828 | 177.56 | 0.0055 | -8.7178  | -7.5933  |
|    | 103->114 | 0.48737  |        |        |        |          |          |
| 28 | 110->116 | 0.2712   | 7.0013 | 177.09 | 0.0208 | 7.1104   | 5.4367   |
|    | 111->117 | -0.30564 |        |        |        |          |          |
|    | 112->117 | 0.47782  |        |        |        |          |          |
| 29 | 107->115 | 0.44401  | 7.0928 | 174.80 | 0.0065 | 9.9599   | 10.263   |
|    | 108->115 | -0.40598 |        |        |        |          |          |
| 30 | 102->114 | 0.23989  | 7.1300 | 173.89 | 0.0004 | 0.8777   | 0.885    |
|    | 106->116 | 0.46653  |        |        |        |          |          |
| 31 | 111->117 | 0.4886   | 7.1812 | 172.65 | 0.1743 | -3.698   | -2.3452  |
|    | 112->117 | 0.30756  |        |        |        |          |          |
| 32 | 109->117 | 0.43358  | 7.2228 | 171.66 | 0.0081 | -6.9357  | -8.8245  |
| 33 | 97->114  | 0.23733  | 7.2736 | 170.46 | 0.0104 | -1.1795  | 0.1581   |
|    | 106->116 | 0.37681  |        |        |        |          |          |
|    | 109->117 | -0.26817 |        |        |        |          |          |
| 34 | 97->114  | 0.5609   | 7.3002 | 169.84 | 0.0196 | 3.9448   | 3.98     |
| 35 | 104->115 | -0.27596 | 7.3914 | 167.74 | 0.1789 | -0.808   | -1.3437  |
|    | 110->117 | 0.55925  |        |        |        |          |          |
| 36 | 93->114  | 0.26482  | 7.5068 | 165.16 | 0.0003 | 1.4738   | 1.5009   |
|    | 107->115 | 0.24255  |        |        |        |          |          |
|    | 108->115 | 0.23525  |        |        |        |          |          |

<sup>a</sup>Number of the excited states; <sup>b</sup>Only transitions with contribution over 10.0% were listed;

<sup>c</sup>Configuration-interaction coefficient; <sup>d</sup>Excitation energy; <sup>e</sup>Wavelength; <sup>f</sup>Oscillator strength;

<sup>g</sup>Rotatory strength in velocity form ( $10^{-40}$  cgs); <sup>h</sup>Rotatory strength in length form ( $10^{-40}$  cgs).

**Table S32.** Key transitions, oscillator strengths, and rotatory strengths in the ECD spectrum of conformer cpd-2A-5 at the Cam-B3LYP/Def2SVP level of theory in acetonitrile with IEFPCM solvent model.

| <i>Num</i> <sup>a</sup> | <i>Transition</i> <sup>b</sup> | <i>CI-coeff</i> <sup>b</sup> | <i>ΔE (eV)</i> <sup>d</sup> | <i>λ (nm)</i> <sup>e</sup> | <i>f</i> <sup>f</sup> | <i>R<sub>vel</sub></i> <sup>g</sup> | <i>R<sub>len</sub></i> <sup>h</sup> |
|-------------------------|--------------------------------|------------------------------|-----------------------------|----------------------------|-----------------------|-------------------------------------|-------------------------------------|
| 1                       | 113->114                       | 0.69192                      | 3.2216                      | 384.85                     | 0.2961                | 0.4057                              | 0.4132                              |
| 2                       | 107->114                       | -0.40325                     | 3.4545                      | 358.91                     | 0.0000                | -0.0884                             | -0.1652                             |
|                         | 109->114                       | 0.52797                      |                             |                            |                       |                                     |                                     |
| 3                       | 112->114                       | 0.68462                      | 3.7379                      | 331.70                     | 0.0184                | -0.1086                             | -0.0795                             |
| 4                       | 107->114                       | 0.5006                       | 3.8142                      | 325.06                     | 0.0000                | 0.5266                              | 0.4384                              |
|                         | 109->114                       | 0.38449                      |                             |                            |                       |                                     |                                     |
|                         | 109->115                       | -0.26566                     |                             |                            |                       |                                     |                                     |
| 5                       | 111->114                       | 0.63561                      | 3.9282                      | 315.63                     | 0.1292                | -1.9239                             | -1.5545                             |
| 6                       | 110->114                       | 0.6268                       | 4.5527                      | 272.33                     | 0.2033                | -0.207                              | -0.3565                             |
|                         | 111->114                       | 0.24672                      |                             |                            |                       |                                     |                                     |
| 7                       | 113->115                       | 0.65342                      | 4.9682                      | 249.56                     | 0.6004                | -2.2382                             | -2.2415                             |
| 8                       | 112->115                       | 0.63333                      | 5.3263                      | 232.78                     | 0.1280                | 1.3891                              | 1.4442                              |
| 9                       | 111->115                       | 0.47863                      | 5.4328                      | 228.22                     | 0.1081                | 1.792                               | 1.4015                              |
|                         | 113->116                       | -0.34731                     |                             |                            |                       |                                     |                                     |
| 10                      | 110->115                       | 0.43265                      | 5.5970                      | 221.52                     | 0.1580                | 0.7241                              | 0.7123                              |
|                         | 111->115                       | -0.27776                     |                             |                            |                       |                                     |                                     |
|                         | 113->116                       | -0.34416                     |                             |                            |                       |                                     |                                     |
| 11                      | 108->114                       | 0.65981                      | 5.7571                      | 215.36                     | 0.0140                | 3.303                               | 2.8776                              |
| 12                      | 109->115                       | 0.59579                      | 5.7942                      | 213.98                     | 0.0004                | -2.3849                             | -2.3799                             |
| 13                      | 103->114                       | -0.23899                     | 6.0160                      | 206.09                     | 0.2523                | 1.1179                              | 1.3572                              |
|                         | 104->114                       | 0.56084                      |                             |                            |                       |                                     |                                     |
| 14                      | 111->115                       | 0.28749                      | 6.1128                      | 202.83                     | 0.2954                | -2.3248                             | -2.3715                             |
|                         | 112->116                       | 0.43019                      |                             |                            |                       |                                     |                                     |
|                         | 113->116                       | 0.32852                      |                             |                            |                       |                                     |                                     |
| 15                      | 102->114                       | 0.30312                      | 6.1460                      | 201.73                     | 0.0005                | -2.1137                             | -1.9649                             |
|                         | 103->114                       | 0.38245                      |                             |                            |                       |                                     |                                     |
|                         | 104->114                       | 0.23375                      |                             |                            |                       |                                     |                                     |
|                         | 112->116                       | -0.26652                     |                             |                            |                       |                                     |                                     |
| 16                      | 105->114                       | -0.258                       | 6.2723                      | 197.67                     | 0.0114                | 22.1896                             | 22.9535                             |
|                         | 106->114                       | 0.25515                      |                             |                            |                       |                                     |                                     |
|                         | 107->115                       | 0.34578                      |                             |                            |                       |                                     |                                     |
| 17                      | 104->114                       | -0.24655                     | 6.2862                      | 197.23                     | 0.4750                | -22.2107                            | -23.2081                            |
|                         | 110->115                       | 0.37774                      |                             |                            |                       |                                     |                                     |
|                         | 112->116                       | -0.31873                     |                             |                            |                       |                                     |                                     |
|                         | 113->116                       | 0.27685                      |                             |                            |                       |                                     |                                     |
| 18                      | 106->114                       | 0.46216                      | 6.4361                      | 192.64                     | 0.0013                | 0.6448                              | 0.3356                              |
|                         | 107->115                       | -0.42989                     |                             |                            |                       |                                     |                                     |
| 19                      | 105->114                       | 0.23229                      | 6.4943                      | 190.91                     | 0.0015                | 0.8193                              | 1.0938                              |
|                         | 106->114                       | 0.37487                      |                             |                            |                       |                                     |                                     |

|    |          |          |        |        |        |          |         |
|----|----------|----------|--------|--------|--------|----------|---------|
|    | 111->116 | -0.26309 |        |        |        |          |         |
| 20 | 111->116 | 0.36104  | 6.5052 | 190.59 | 0.0008 | -1.2037  | -1.1518 |
|    | 113->117 | 0.29587  |        |        |        |          |         |
| 21 | 100->114 | -0.24989 | 6.6986 | 185.09 | 0.0005 | -1.4313  | -1.2785 |
|    | 109->116 | 0.57245  |        |        |        |          |         |
| 22 | 110->116 | -0.24351 | 6.7355 | 184.08 | 0.2035 | -0.6462  | -0.8783 |
|    | 111->116 | -0.32072 |        |        |        |          |         |
|    | 113->117 | 0.46954  |        |        |        |          |         |
| 23 | 91->114  | -0.27261 | 6.8230 | 181.71 | 0.0007 | 0.7336   | 0.8261  |
|    | 98->114  | 0.39191  |        |        |        |          |         |
|    | 105->114 | -0.32609 |        |        |        |          |         |
| 24 | 112->117 | 0.50479  | 6.8621 | 180.68 | 0.1280 | 2.7457   | 3.1874  |
| 25 | 100->114 | 0.44583  | 6.8757 | 180.32 | 0.0007 | -2.5552  | -2.5706 |
|    | 101->114 | 0.2573   |        |        |        |          |         |
|    | 109->116 | 0.25661  |        |        |        |          |         |
| 26 | 98->114  | 0.29831  | 6.9211 | 179.14 | 0.0009 | 0.3787   | 0.2176  |
|    | 105->114 | 0.3743   |        |        |        |          |         |
| 27 | 110->116 | 0.58511  | 7.0577 | 175.67 | 0.1303 | -0.1008  | -0.3481 |
|    | 112->117 | -0.2713  |        |        |        |          |         |
| 28 | 101->114 | 0.23491  | 7.1451 | 173.52 | 0.0630 | 9.4002   | 10.5845 |
|    | 102->114 | -0.25407 |        |        |        |          |         |
|    | 103->114 | 0.23874  |        |        |        |          |         |
|    | 111->117 | 0.39855  |        |        |        |          |         |
| 29 | 100->114 | 0.2606   | 7.1672 | 172.99 | 0.0293 | 18.0968  | 15.6662 |
|    | 107->116 | 0.45121  |        |        |        |          |         |
|    | 109->117 | -0.30486 |        |        |        |          |         |
| 30 | 102->114 | 0.27941  | 7.1716 | 172.88 | 0.1065 | -43.9384 | -43.786 |
|    | 111->117 | 0.35766  |        |        |        |          |         |
| 31 | 107->116 | 0.34555  | 7.2879 | 170.12 | 0.0010 | 2.0244   | 2.5952  |
|    | 109->117 | 0.50044  |        |        |        |          |         |
| 32 | 108->115 | 0.62764  | 7.2991 | 169.86 | 0.0100 | 2.1882   | 1.7238  |
| 33 | 97->114  | -0.35874 | 7.3741 | 168.14 | 0.0757 | 7.3566   | 8.3771  |
|    | 104->115 | 0.51397  |        |        |        |          |         |
| 34 | 94->114  | 0.34677  | 7.4128 | 167.26 | 0.0020 | 7.1443   | 6.5344  |
|    | 101->114 | -0.25984 |        |        |        |          |         |
| 35 | 97->114  | 0.49636  | 7.4897 | 165.54 | 0.0136 | -0.7448  | -0.2752 |
|    | 110->117 | 0.3798   |        |        |        |          |         |
| 36 | 91->114  | 0.2569   | 7.6379 | 162.33 | 0.0009 | 0.7794   | 0.7461  |
|    | 94->114  | 0.2474   |        |        |        |          |         |

<sup>a</sup>Number of the excited states; <sup>b</sup>Only transitions with contribution over 10.0% were listed; <sup>c</sup>Configuration-interaction coefficient; <sup>d</sup>Excitation energy; <sup>e</sup>Wavelength; <sup>f</sup>Oscillator strength; <sup>g</sup>Rotatory strength in velocity form ( $10^{-40}$  cgs); <sup>h</sup>Rotatory strength in length form ( $10^{-40}$  cgs).



**Table S33.** Key transitions, oscillator strengths, and rotatory strengths in the ECD spectrum of conformer cpd-2A-6 at the Cam-B3LYP/Def2SVP level of theory in acetonitrile with IEFPCM solvent model.

| <i>Num</i> <sup>a</sup> | <i>Transition</i> <sup>b</sup> | <i>CI-coeff</i> <sup>b</sup> | <i>ΔE (eV)</i> <sup>d</sup> | <i>λ (nm)</i> <sup>e</sup> | <i>f</i> <sup>f</sup> | <i>R<sub>vel</sub></i> <sup>g</sup> | <i>R<sub>len</sub></i> <sup>h</sup> |
|-------------------------|--------------------------------|------------------------------|-----------------------------|----------------------------|-----------------------|-------------------------------------|-------------------------------------|
| 1                       | 113->114                       | 0.69182                      | 3.1824                      | 389.59                     | 0.2355                | -9.9098                             | -9.0812                             |
| 2                       | 107->114                       | -0.39499                     | 3.4402                      | 360.40                     | 0.0000                | -0.261                              | -0.4439                             |
|                         | 109->114                       | 0.50401                      |                             |                            |                       |                                     |                                     |
| 3                       | 112->114                       | 0.67554                      | 3.7290                      | 332.48                     | 0.0293                | 14.7091                             | 14.1185                             |
| 4                       | 107->114                       | 0.50042                      | 3.8090                      | 325.50                     | 0.0007                | 3.6101                              | 3.8638                              |
|                         | 109->114                       | 0.36268                      |                             |                            |                       |                                     |                                     |
|                         | 109->115                       | -0.24283                     |                             |                            |                       |                                     |                                     |
| 5                       | 111->114                       | 0.63971                      | 3.8737                      | 320.07                     | 0.1270                | 6.2448                              | 5.7699                              |
| 6                       | 110->114                       | 0.64996                      | 4.4109                      | 281.09                     | 0.2470                | -11.4374                            | -12.6787                            |
|                         | 111->114                       | 0.22478                      |                             |                            |                       |                                     |                                     |
| 7                       | 113->115                       | 0.65893                      | 4.9802                      | 248.96                     | 0.5767                | 17.1617                             | 19.0148                             |
| 8                       | 112->115                       | 0.62245                      | 5.3759                      | 230.63                     | 0.1803                | 4.8207                              | 4.3462                              |
| 9                       | 111->115                       | 0.4863                       | 5.4375                      | 228.02                     | 0.0266                | -9.7232                             | -10.3108                            |
|                         | 113->116                       | -0.33697                     |                             |                            |                       |                                     |                                     |
| 10                      | 110->115                       | 0.40972                      | 5.6072                      | 221.12                     | 0.1477                | -9.4614                             | -9.5414                             |
|                         | 111->115                       | -0.35092                     |                             |                            |                       |                                     |                                     |
|                         | 113->116                       | -0.28116                     |                             |                            |                       |                                     |                                     |
| 11                      | 108->114                       | 0.62261                      | 5.6386                      | 219.88                     | 0.0197                | -6.4105                             | -6.6308                             |
| 12                      | 109->115                       | 0.57446                      | 5.8259                      | 212.81                     | 0.0001                | -0.7791                             | -0.5036                             |
| 13                      | 103->114                       | 0.29756                      | 5.9657                      | 207.83                     | 0.2201                | -7.3826                             | -6.1186                             |
|                         | 104->114                       | -0.23837                     |                             |                            |                       |                                     |                                     |
|                         | 105->114                       | 0.46356                      |                             |                            |                       |                                     |                                     |
| 14                      | 102->114                       | -0.244                       | 6.0870                      | 203.69                     | 0.0318                | -5.5878                             | -7.0996                             |
|                         | 103->114                       | 0.34948                      |                             |                            |                       |                                     |                                     |
|                         | 105->114                       | -0.34724                     |                             |                            |                       |                                     |                                     |
| 15                      | 110->115                       | 0.24505                      | 6.1112                      | 202.88                     | 0.2755                | 43.1595                             | 45.7222                             |
|                         | 112->116                       | 0.40007                      |                             |                            |                       |                                     |                                     |
|                         | 113->116                       | 0.35528                      |                             |                            |                       |                                     |                                     |
| 16                      | 106->114                       | -0.25644                     | 6.2895                      | 197.13                     | 0.3278                | -65.9307                            | -65.4779                            |
|                         | 110->115                       | -0.29464                     |                             |                            |                       |                                     |                                     |
|                         | 111->116                       | -0.22806                     |                             |                            |                       |                                     |                                     |
|                         | 112->116                       | 0.33844                      |                             |                            |                       |                                     |                                     |
| 17                      | 106->114                       | 0.44714                      | 6.2994                      | 196.82                     | 0.1586                | 54.0403                             | 56.0833                             |
| 18                      | 106->114                       | 0.40721                      | 6.3524                      | 195.18                     | 0.0033                | 5.8025                              | 6.5181                              |
|                         | 107->115                       | -0.36721                     |                             |                            |                       |                                     |                                     |
| 19                      | 101->114                       | -0.22532                     | 6.4799                      | 191.34                     | 0.0009                | 1.3565                              | 1.0488                              |
|                         | 104->114                       | 0.22416                      |                             |                            |                       |                                     |                                     |
|                         | 107->115                       | 0.29564                      |                             |                            |                       |                                     |                                     |
| 20                      | 111->116                       | 0.42029                      | 6.4960                      | 190.86                     | 0.0092                | -5.0887                             | -5.9136                             |

|    |          |          |        |        |        |          |          |
|----|----------|----------|--------|--------|--------|----------|----------|
|    | 113->117 | -0.28851 |        |        |        |          |          |
| 21 | 100->114 | 0.2643   | 6.7134 | 184.68 | 0.0003 | -0.3493  | -0.1105  |
|    | 109->116 | 0.52241  |        |        |        |          |          |
| 22 | 110->116 | 0.49292  | 6.7387 | 183.99 | 0.0474 | 6.112    | 4.3466   |
|    | 113->117 | 0.31041  |        |        |        |          |          |
| 23 | 100->114 | 0.43431  | 6.7491 | 183.70 | 0.0044 | -5.5909  | -5.833   |
|    | 107->115 | -0.31286 |        |        |        |          |          |
| 24 | 110->116 | -0.28846 | 6.8454 | 181.12 | 0.2805 | -25.5499 | -27.6201 |
|    | 112->117 | 0.23176  |        |        |        |          |          |
|    | 113->117 | 0.45495  |        |        |        |          |          |
| 25 | 98->114  | -0.24728 | 6.9284 | 178.95 | 0.0012 | -3.4135  | -3.4913  |
|    | 99->114  | 0.47948  |        |        |        |          |          |
|    | 107->116 | -0.23418 |        |        |        |          |          |
| 26 | 110->116 | 0.31642  | 7.0292 | 176.38 | 0.0760 | 4.2269   | 4.7013   |
|    | 111->117 | -0.2916  |        |        |        |          |          |
|    | 112->117 | 0.48147  |        |        |        |          |          |
| 27 | 101->114 | 0.26657  | 7.0765 | 175.21 | 0.0011 | -1.33    | -1.0774  |
|    | 104->114 | 0.4939   |        |        |        |          |          |
| 28 | 107->116 | -0.26716 | 7.2030 | 172.13 | 0.0548 | -12.0682 | -12.8244 |
|    | 108->115 | 0.33286  |        |        |        |          |          |
|    | 111->117 | 0.30901  |        |        |        |          |          |
| 29 | 107->116 | 0.43929  | 7.2111 | 171.94 | 0.0625 | -11.63   | -9.6221  |
|    | 111->117 | 0.27139  |        |        |        |          |          |
| 30 | 108->115 | 0.4398   | 7.2201 | 171.72 | 0.0635 | 27.2538  | 29.5662  |
|    | 111->117 | -0.28605 |        |        |        |          |          |
| 31 | 95->114  | -0.25977 | 7.2841 | 170.21 | 0.0223 | 23.7035  | 26.2083  |
|    | 109->117 | 0.31349  |        |        |        |          |          |
| 32 | 97->114  | 0.38187  | 7.3129 | 169.54 | 0.0295 | 4.8423   | 2.9569   |
|    | 98->114  | -0.27266 |        |        |        |          |          |
|    | 109->117 | 0.28287  |        |        |        |          |          |
| 33 | 97->114  | -0.28618 | 7.3481 | 168.73 | 0.0011 | -4.9786  | -4.0193  |
|    | 109->117 | 0.2913   |        |        |        |          |          |
| 34 | 102->114 | -0.28157 | 7.3880 | 167.82 | 0.0439 | -5.7402  | -7.2216  |
|    | 110->117 | 0.35107  |        |        |        |          |          |
| 35 | 97->114  | 0.26009  | 7.4005 | 167.53 | 0.1265 | -3.6951  | -4.133   |
|    | 105->115 | -0.26363 |        |        |        |          |          |
|    | 110->117 | 0.42932  |        |        |        |          |          |
| 36 | 91->114  | 0.28005  | 7.5853 | 163.45 | 0.0008 | -2.1679  | -2.3107  |
|    | 95->114  | 0.29139  |        |        |        |          |          |
|    | 98->114  | 0.2662   |        |        |        |          |          |
|    | 99->114  | 0.24162  |        |        |        |          |          |

<sup>a</sup>Number of the excited states; <sup>b</sup>Only transitions with contribution over 10.0% were listed; <sup>c</sup>Configuration-interaction coefficient; <sup>d</sup>Excitation energy; <sup>e</sup>Wavelength; <sup>f</sup>Oscillator strength;

<sup>g</sup>Rotatory strength in velocity form ( $10^{-40}$  cgs); <sup>h</sup>Rotatory strength in length form ( $10^{-40}$  cgs).

**Table S34.** Key transitions, oscillator strengths, and rotatory strengths in the ECD spectrum of conformer cpd-2A-7 at the Cam-B3LYP/Def2SVP level of theory in acetonitrile with IEFPCM solvent model.

| <i>Num</i> <sup>a</sup> | <i>Transition</i> <sup>b</sup> | <i>CI-coeff</i> <sup>b</sup> | <i>ΔE (eV)</i> <sup>d</sup> | <i>λ (nm)</i> <sup>e</sup> | <i>f</i> <sup>f</sup> | <i>R<sub>vel</sub></i> <sup>g</sup> | <i>R<sub>len</sub></i> <sup>h</sup> |
|-------------------------|--------------------------------|------------------------------|-----------------------------|----------------------------|-----------------------|-------------------------------------|-------------------------------------|
| 1                       | 113->114                       | 0.69132                      | 3.1789                      | 390.03                     | 0.2337                | -0.0188                             | -0.0345                             |
| 2                       | 106->114                       | -0.38914                     | 3.4363                      | 360.81                     | 0.0000                | 1.5446                              | 1.5377                              |
|                         | 109->114                       | 0.5384                       |                             |                            |                       |                                     |                                     |
| 3                       | 112->114                       | 0.673                        | 3.6984                      | 335.23                     | 0.0463                | 5.9038                              | 5.0939                              |
| 4                       | 106->114                       | 0.50514                      | 3.7992                      | 326.34                     | 0.0001                | 0.083                               | 0.3215                              |
|                         | 109->114                       | 0.3753                       |                             |                            |                       |                                     |                                     |
|                         | 109->115                       | -0.2534                      |                             |                            |                       |                                     |                                     |
| 5                       | 111->114                       | 0.64619                      | 3.8599                      | 321.21                     | 0.1205                | -0.357                              | -1.0087                             |
| 6                       | 110->114                       | 0.64969                      | 4.4002                      | 281.77                     | 0.2409                | -7.9834                             | -7.6262                             |
| 7                       | 113->115                       | 0.65808                      | 5.0169                      | 247.13                     | 0.5854                | 4.0853                              | 3.9655                              |
| 8                       | 112->115                       | 0.60299                      | 5.3844                      | 230.27                     | 0.1810                | -1.947                              | -2.0101                             |
|                         | 113->116                       | -0.22437                     |                             |                            |                       |                                     |                                     |
| 9                       | 111->115                       | 0.49163                      | 5.4564                      | 227.23                     | 0.0312                | -2.5151                             | -2.1639                             |
|                         | 113->116                       | -0.3316                      |                             |                            |                       |                                     |                                     |
| 10                      | 110->115                       | 0.41001                      | 5.6145                      | 220.83                     | 0.1528                | -2.5765                             | -2.5282                             |
|                         | 111->115                       | -0.36359                     |                             |                            |                       |                                     |                                     |
|                         | 113->116                       | -0.2725                      |                             |                            |                       |                                     |                                     |
| 11                      | 108->114                       | 0.59406                      | 5.8249                      | 212.85                     | 0.0088                | 2.9402                              | 2.7989                              |
| 12                      | 109->115                       | 0.56161                      | 5.8503                      | 211.93                     | 0.0004                | -2.6912                             | -2.6135                             |
| 13                      | 103->114                       | 0.37345                      | 5.9637                      | 207.90                     | 0.2397                | 6.5866                              | 7.3612                              |
|                         | 104->114                       | 0.49895                      |                             |                            |                       |                                     |                                     |
| 14                      | 103->114                       | 0.42251                      | 6.0689                      | 204.29                     | 0.0069                | -0.9745                             | 0.248                               |
|                         | 104->114                       | -0.31318                     |                             |                            |                       |                                     |                                     |
|                         | 112->116                       | 0.26243                      |                             |                            |                       |                                     |                                     |
| 15                      | 110->115                       | 0.25082                      | 6.0963                      | 203.38                     | 0.3079                | 12.8315                             | 12.7954                             |
|                         | 112->116                       | 0.36222                      |                             |                            |                       |                                     |                                     |
|                         | 113->116                       | 0.36147                      |                             |                            |                       |                                     |                                     |
| 16                      | 107->114                       | 0.60973                      | 6.1623                      | 201.20                     | 0.0007                | -0.0127                             | -0.0869                             |
| 17                      | 110->115                       | 0.3454                       | 6.2864                      | 197.22                     | 0.4683                | 29.5039                             | 31.1921                             |
|                         | 111->116                       | 0.27655                      |                             |                            |                       |                                     |                                     |
|                         | 112->116                       | -0.33828                     |                             |                            |                       |                                     |                                     |
|                         | 113->116                       | 0.24467                      |                             |                            |                       |                                     |                                     |
| 18                      | 100->114                       | -0.24779                     | 6.3243                      | 196.04                     | 0.0346                | -34.2501                            | -35.7062                            |
|                         | 105->114                       | -0.2475                      |                             |                            |                       |                                     |                                     |
|                         | 106->115                       | 0.32547                      |                             |                            |                       |                                     |                                     |
|                         | 107->114                       | 0.22931                      |                             |                            |                       |                                     |                                     |
| 19                      | 106->115                       | -0.26565                     | 6.4630                      | 191.84                     | 0.0068                | -10.6663                            | -10.8209                            |

|    |          |          |        |        |        |          |          |
|----|----------|----------|--------|--------|--------|----------|----------|
|    | 111->116 | 0.36336  |        |        |        |          |          |
| 20 | 106->115 | 0.28147  | 6.4709 | 191.60 | 0.0046 | 10.1509  | 10.0541  |
|    | 111->116 | 0.27042  |        |        |        |          |          |
| 21 | 109->116 | 0.59086  | 6.6982 | 185.10 | 0.0001 | -0.9139  | -0.3608  |
| 22 | 110->116 | 0.50953  | 6.7295 | 184.24 | 0.0363 | -0.1941  | -1.7899  |
|    | 113->117 | 0.32416  |        |        |        |          |          |
| 23 | 99->114  | 0.46096  | 6.7387 | 183.99 | 0.0016 | 3.7862   | 3.9429   |
|    | 106->115 | -0.30017 |        |        |        |          |          |
| 24 | 110->116 | -0.28858 | 6.8477 | 181.06 | 0.3066 | -17.4794 | -17.0995 |
|    | 113->117 | 0.48213  |        |        |        |          |          |
| 25 | 98->114  | 0.54203  | 6.9262 | 179.01 | 0.0006 | 2.1057   | 2.1489   |
|    | 106->116 | -0.23373 |        |        |        |          |          |
| 26 | 100->114 | -0.225   | 6.9520 | 178.34 | 0.0004 | 0.3749   | 0.3447   |
|    | 102->114 | 0.25772  |        |        |        |          |          |
|    | 105->114 | 0.45088  |        |        |        |          |          |
| 27 | 110->116 | 0.28777  | 7.0388 | 176.14 | 0.0490 | 3.3752   | 2.0991   |
|    | 111->117 | -0.32502 |        |        |        |          |          |
|    | 112->117 | 0.47096  |        |        |        |          |          |
| 28 | 111->117 | 0.45693  | 7.1891 | 172.46 | 0.1719 | 20.1855  | 21.0438  |
|    | 112->117 | 0.30528  |        |        |        |          |          |
| 29 | 106->116 | 0.49602  | 7.2007 | 172.18 | 0.0358 | -17.0014 | -16.4189 |
| 30 | 94->114  | -0.27495 | 7.2666 | 170.62 | 0.0110 | -14.5442 | -15.6538 |
|    | 102->114 | -0.24974 |        |        |        |          |          |
|    | 109->117 | 0.30859  |        |        |        |          |          |
| 31 | 97->114  | 0.48586  | 7.3196 | 169.39 | 0.0339 | 9.59     | 11.8741  |
|    | 109->117 | -0.23859 |        |        |        |          |          |
| 32 | 97->114  | 0.3231   | 7.3389 | 168.94 | 0.0010 | -0.6182  | -1.779   |
|    | 109->117 | 0.4084   |        |        |        |          |          |
| 33 | 99->114  | 0.22872  | 7.3768 | 168.07 | 0.0008 | 1.4388   | 1.8014   |
|    | 101->114 | 0.29137  |        |        |        |          |          |
| 34 | 104->115 | -0.29439 | 7.4253 | 166.98 | 0.1661 | -3.4149  | -3.996   |
|    | 110->117 | 0.55182  |        |        |        |          |          |
| 35 | 108->115 | 0.56547  | 7.4475 | 166.48 | 0.0090 | 14.3825  | 14.4971  |
| 36 | 92->114  | 0.35382  | 7.6135 | 162.85 | 0.0005 | 1.4631   | 1.3741   |
|    | 94->114  | 0.26551  |        |        |        |          |          |

<sup>a</sup>Number of the excited states; <sup>b</sup>Only transitions with contribution over 10.0% were listed; <sup>c</sup>Configuration-interaction coefficient; <sup>d</sup>Excitation energy; <sup>e</sup>Wavelength; <sup>f</sup>Oscillator strength; <sup>g</sup>Rotatory strength in velocity form ( $10^{-40}$  cgs); <sup>h</sup>Rotatory strength in length form ( $10^{-40}$  cgs).

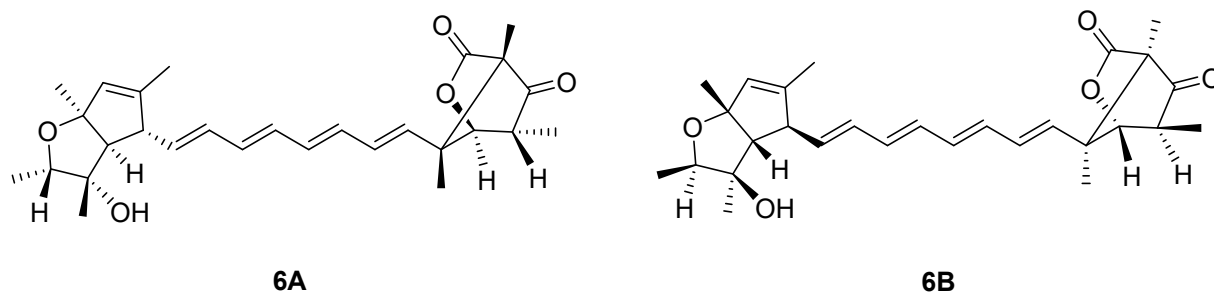

**Table S35.** Experimental and calculated  $^{13}\text{C}$ -NMR chemical shifts of cpd-6A

| No. | $\delta_{\text{exptl.}}$ | cpd-6A- $\delta_{\text{calcd.}}$ |
|-----|--------------------------|----------------------------------|
| 1   | 171.8                    | 168.1                            |
| 2   | 69.7                     | 73.9                             |
| 3   | 207.8                    | 207.5                            |
| 4   | 44.1                     | 47.5                             |
| 5   | 85.4                     | 84.3                             |
| 6   | 58.7                     | 62.8                             |
| 7   | 131.2                    | 129.2                            |
| 8   | 134.3                    | 132.0                            |
| 9   | 131.1                    | 129.6                            |
| 10  | 134.4                    | 133.0                            |
| 11  | 130.9                    | 129.4                            |
| 12  | 135.0                    | 132.4                            |
| 13  | 129.5                    | 128.1                            |
| 14  | 138.4                    | 139.0                            |
| 15  | 55.9                     | 58.2                             |
| 16  | 144.5                    | 144.4                            |
| 17  | 129.4                    | 126.5                            |
| 18  | 92.2                     | 92.2                             |
| 19  | 66.2                     | 68.8                             |
| 20  | 80.8                     | 80.0                             |
| 21  | 78.2                     | 75.8                             |
| 22  | 5.4                      | 7.1                              |
| 23  | 11.7                     | 14.6                             |
| 24  | 17.6                     | 17.8                             |
| 25  | 15.1                     | 16.5                             |
| 26  | 27.5                     | 29.2                             |
| 27  | 19.3                     | 18.8                             |
| 28  | 11.9                     | 13.4                             |

**Table 36.** Experimental and calculated  $^1\text{H}$ -NMR chemical shifts of cpd-6A

| No. | $\delta_{\text{exptl.}}$ | cpd-6A- $\delta_{\text{calcd.}}$ |
|-----|--------------------------|----------------------------------|
| 4   | 2.79                     | 2.35                             |

|    |      |      |
|----|------|------|
| 5  | 4.73 | 4.65 |
| 7  | 5.46 | 5.93 |
| 8  | 6.2  | 6.56 |
| 9  | 6.16 | 6.43 |
| 10 | 6.07 | 6.63 |
| 11 | 6.28 | 6.49 |
| 12 | 6.24 | 6.53 |
| 13 | 6.1  | 6.3  |
| 14 | 5.53 | 5.8  |
| 15 | 2.96 | 2.91 |
| 17 | 5.23 | 5.38 |
| 19 | 2.16 | 1.98 |
| 21 | 3.45 | 3.44 |
| 22 | 1.2  | 0.85 |
| 23 | 1.22 | 1.08 |
| 24 | 1.38 | 0.92 |
| 25 | 1.63 | 1.4  |
| 26 | 1.49 | 1.39 |
| 27 | 1.21 | 0.95 |
| 28 | 1.16 | 1.0  |

**Table S37.** Conformational analysis of the B3LYP/6-31G(d) optimized conformers of cpd-6A in the gas phase (T=298.15 K)

| Conformer | E <sup>a</sup> (Hartree) | C <sup>b</sup> (Hartree) | G <sup>c</sup> (kcal/mol) | ΔG <sup>d</sup> (kcal/mol) | Population <sup>e</sup> |
|-----------|--------------------------|--------------------------|---------------------------|----------------------------|-------------------------|
| cpd-6A-1  | -1464.554406             | 0.509547                 | -918688.149248            | 0.0                        | 49.83%                  |
| cpd-6A-2  | -1464.552302             | 0.50833                  | -918687.592286            | 0.556963                   | 19.45%                  |
| cpd-6A-3  | -1464.553824             | 0.510036                 | -918687.476744            | 0.672504                   | 16.00%                  |
| cpd-6A-4  | -1464.552767             | 0.509523                 | -918687.135472            | 1.013776                   | 8.99%                   |
| cpd-6A-5  | -1464.553284             | 0.510468                 | -918686.86731             | 1.281939                   | 5.72%                   |

<sup>a</sup>Electronic energy obtained at M062X/6-311+G(2d,p) level of theory; <sup>b</sup>Thermal correction to Gibbs free energy obtained at B3LYP/6-31G(d) level of theory; <sup>c</sup>Gibbs free energy (E + C); <sup>d</sup>The relative Gibbs free energy; <sup>e</sup>The Boltzmann distribution of each conformer.

**Table S38.** Atomic coordinates (Å) of cpd-6A-1 obtained at the B3LYP/6-31G(d) level of theory in the gas phase.

|   |          |           |           |   |           |           |           |
|---|----------|-----------|-----------|---|-----------|-----------|-----------|
| C | 7.064932 | 1.239154  | -1.005685 | H | -5.027079 | 0.081934  | -1.327848 |
| C | 6.960141 | 0.874080  | 0.483207  | H | -1.361271 | -1.074742 | 1.251326  |
| C | 8.360370 | 0.292466  | 0.787332  | H | -0.175705 | 0.176668  | -1.293457 |
| C | 8.491433 | -1.006131 | -0.032405 | H | 1.098680  | -0.997028 | 1.287557  |
| C | 7.117963 | -1.014175 | -0.722662 | H | 2.310511  | 0.213872  | -1.265135 |
| C | 6.124025 | -0.464479 | 0.349974  | H | 3.537751  | -0.956182 | 1.335379  |
| C | 4.757664 | -0.223837 | -0.233238 | H | 4.739609  | 0.223922  | -1.224775 |

|   |           |           |           |   |           |           |           |
|---|-----------|-----------|-----------|---|-----------|-----------|-----------|
| C | 3.574028  | -0.504110 | 0.346207  | H | 6.832106  | -1.929243 | -1.239477 |
| C | 2.296852  | -0.244122 | -0.275951 | H | 5.627948  | -2.254051 | 1.479727  |
| C | 1.104215  | -0.537887 | 0.297958  | H | 7.043063  | -1.398057 | 2.116814  |
| C | -0.176232 | -0.290230 | -0.307970 | H | 5.437169  | -0.743184 | 2.381965  |
| C | -1.362930 | -0.605263 | 0.266906  | H | 8.563475  | -1.846791 | 0.666932  |
| C | -2.651826 | -0.368522 | -0.339021 | H | 7.129516  | 2.868171  | 1.248246  |
| C | -3.828188 | -0.703254 | 0.223184  | H | 5.462584  | 2.265530  | 1.154200  |
| C | -5.176675 | -0.489620 | -0.402779 | H | 6.556248  | 1.685886  | 2.435065  |
| C | -5.859927 | -1.810859 | -0.741181 | H | 9.801515  | -1.981050 | -1.466296 |
| C | -7.016459 | -1.951461 | -0.088803 | H | 9.653898  | -0.230864 | -1.703774 |
| C | -7.365639 | -0.772869 | 0.780095  | H | 10.619827 | -0.861934 | -0.354576 |
| C | -6.173534 | 0.221376  | 0.560202  | H | -7.684373 | -2.804436 | -0.176028 |
| C | -6.884813 | 1.493651  | 0.030474  | H | -5.679073 | 0.480811  | 1.499315  |
| C | -8.088978 | 0.862731  | -0.699892 | H | -7.726678 | 0.336021  | -1.597676 |
| C | 6.494937  | 1.989087  | 1.385870  | H | -5.828721 | -3.673416 | -1.825931 |
| C | 9.715731  | -1.019363 | -0.949764 | H | -5.097514 | -2.302616 | -2.687052 |
| C | 6.063901  | -1.264634 | 1.653012  | H | -4.224938 | -3.057804 | -1.360565 |
| C | -5.226936 | -2.768602 | -1.700520 | H | -         | 10.084338 | 1.213069  |
| C | -7.662011 | -1.141205 | 2.227175  | H | -9.540413 | 2.385250  | -0.205719 |
| C | -6.047475 | 2.455327  | -0.794148 | H | -8.915545 | 2.476713  | -1.863226 |
| C | -9.228330 | 1.791221  | -1.068538 | H | -8.558321 | -1.767671 | 2.285983  |
| O | 7.087247  | 2.322474  | -1.521455 | H | -6.822226 | -1.695437 | 2.658630  |
| O | 7.138617  | 0.063321  | -1.709012 | H | -7.828860 | -0.242211 | 2.830469  |
| O | -8.546591 | -0.093054 | 0.266254  | H | -5.141000 | 2.740086  | -0.250757 |
| O | 9.182243  | 0.771279  | 1.531715  | H | -5.755846 | 2.020968  | -1.754623 |
| O | -7.364776 | 2.239657  | 1.156252  | H | -6.626352 | 3.363127  | -0.987739 |
| H | -3.831840 | -1.190729 | 1.199740  | H | -8.081616 | 1.701559  | 1.535552  |
| H | -2.653549 | 0.113634  | -1.317685 | - | -         | -         | -         |

**Table S39.** Atomic coordinates (Å) of cpd-6A-2 obtained at the B3LYP/6-31G(d) level of theory in the gas phase.

|   |           |           |           |   |           |          |           |
|---|-----------|-----------|-----------|---|-----------|----------|-----------|
| C | -5.998013 | -1.479423 | 0.344298  | H | 5.729592  | 0.853223 | -1.872357 |
| C | -6.773665 | -0.321849 | 0.993699  | H | 1.116433  | 0.044399 | -1.914182 |
| C | -8.152594 | -0.394033 | 0.297422  | H | 0.380150  | 1.435605 | 0.725543  |
| C | -7.920690 | -0.044749 | -1.186527 | H | -1.318417 | 0.141986 | -1.534766 |
| C | -6.398361 | 0.171671  | -1.162917 | H | -2.072185 | 1.512469 | 1.111217  |
| C | -6.119255 | 0.872613  | 0.190001  | H | -3.735510 | 0.221490 | -1.174228 |
| C | -4.663175 | 1.070605  | 0.522237  | H | -4.488019 | 1.564477 | 1.478199  |
| C | -3.594870 | 0.735029  | -0.225725 | H | -5.955280 | 0.613596 | -2.054921 |
| C | -2.229637 | 1.002555  | 0.160383  | H | -6.600656 | 2.617835 | 1.379603  |
| C | -1.153170 | 0.656774  | -0.587556 | H | -6.507262 | 2.941723 | -0.354119 |
| C | 0.212136  | 0.919024  | -0.220150 | H | -7.932462 | 2.134745 | 0.334343  |

|   |           |           |           |   |           |           |           |
|---|-----------|-----------|-----------|---|-----------|-----------|-----------|
| C | 1.284362  | 0.563982  | -0.970084 | H | -8.430129 | 0.902589  | -1.397661 |
| C | 2.655473  | 0.824666  | -0.601514 | H | -7.278416 | -1.250963 | 2.855553  |
| C | 3.720102  | 0.462517  | -1.342027 | H | -5.778970 | -0.308486 | 2.905506  |
| C | 5.164401  | 0.666145  | -0.949964 | H | -7.359767 | 0.516542  | 2.889902  |
| C | 5.376954  | 1.814376  | 0.021792  | H | -7.906699 | -2.057373 | -2.014801 |
| C | 5.802216  | 1.379804  | 1.210787  | H | -9.505355 | -1.287277 | -1.960196 |
| C | 6.025657  | -0.108895 | 1.264413  | H | -8.319104 | -0.793248 | -3.187514 |
| C | 5.724044  | -0.586736 | -0.199188 | H | 6.022856  | 2.010793  | 2.067778  |
| C | 7.088695  | -1.169361 | -0.658902 | H | 4.995213  | -1.398914 | -0.221949 |
| C | 8.070687  | -0.351668 | 0.205260  | H | 8.090906  | 0.686528  | -0.163160 |
| C | -6.794965 | -0.336625 | 2.502274  | H | 4.079069  | 3.355123  | -0.732340 |
| C | -8.441802 | -1.113925 | -2.147690 | H | 5.291243  | 3.928187  | 0.436055  |
| C | -6.843625 | 2.213686  | 0.391995  | H | 5.759837  | 3.517830  | -1.226704 |
| C | 5.112212  | 3.230262  | -0.387291 | H | 10.038867 | -0.319660 | 1.077622  |
| C | 5.244264  | -0.813717 | 2.363351  | H | 9.475896  | -1.942013 | 0.610680  |
| C | 7.373805  | -1.156822 | -2.150178 | H | 10.005239 | -0.793837 | -0.632924 |
| C | 9.483157  | -0.887111 | 0.325276  | H | 5.558878  | -0.454875 | 3.349081  |
| O | -5.624691 | -2.509152 | 0.832984  | H | 4.172778  | -0.623189 | 2.246655  |
| O | -5.794145 | -1.144957 | -0.969996 | H | 5.409790  | -1.895788 | 2.321625  |
| O | 7.433899  | -0.392791 | 1.489414  | H | 6.565509  | -1.647156 | -2.702498 |
| O | -9.203996 | -0.666993 | 0.825690  | H | 7.491353  | -0.138448 | -2.532207 |
| O | 7.143173  | -2.541925 | -0.249744 | H | 8.298209  | -1.707665 | -2.347245 |
| H | 3.551167  | -0.070822 | -2.278061 | H | 7.174352  | -2.520521 | 0.722798  |
| H | 2.820917  | 1.344877  | 0.342016  | - | -         | -         | -         |

**Table S40.** Atomic coordinates (Å) of cpd-6A-3 obtained at the B3LYP/6-31G(d) level of theory in the gas phase.

|   |           |           |           |   |           |           |           |
|---|-----------|-----------|-----------|---|-----------|-----------|-----------|
| C | 6.400914  | -1.285359 | -0.358491 | H | -4.959315 | 0.154258  | -1.333635 |
| C | 7.098417  | -0.002217 | -0.838136 | H | -1.079881 | -0.762325 | 1.016093  |
| C | 8.382881  | 0.037229  | 0.022170  | H | -0.184230 | 0.881076  | -1.421906 |
| C | 7.933791  | 0.249808  | 1.481897  | H | 1.355995  | -0.356542 | 0.978638  |
| C | 6.410038  | 0.289347  | 1.277616  | H | 2.262529  | 1.273347  | -1.464721 |
| C | 6.210398  | 1.048191  | -0.058125 | H | 3.775134  | 0.032525  | 0.949618  |
| C | 4.791916  | 1.098856  | -0.563383 | H | 4.674708  | 1.633664  | -1.506191 |
| C | 3.689941  | 0.590112  | 0.019629  | H | 5.812882  | 0.612036  | 2.129981  |
| C | 2.361256  | 0.720856  | -0.529875 | H | 7.856958  | 2.520021  | 0.101888  |
| C | 1.250580  | 0.199152  | 0.046155  | H | 6.609235  | 2.919911  | -1.074125 |
| C | -0.077728 | 0.323711  | -0.490535 | H | 6.270497  | 3.102840  | 0.649470  |
| C | -1.185841 | -0.203332 | 0.085768  | H | 8.292166  | 1.232797  | 1.808723  |
| C | -2.519876 | -0.076123 | -0.451415 | H | 7.939996  | -0.727382 | -2.668376 |
| C | -3.623707 | -0.594617 | 0.118196  | H | 6.346563  | 0.023202  | -2.857809 |
| C | -5.015228 | -0.469602 | -0.431958 | H | 7.791464  | 1.034546  | -2.594964 |
| C | -5.614672 | -1.820904 | -0.805921 | H | 8.074764  | -1.804960 | 2.187193  |



|   |           |           |           |   |            |           |           |
|---|-----------|-----------|-----------|---|------------|-----------|-----------|
| C | -6.735309 | -2.071471 | -0.124459 | H | 9.557674   | -0.848739 | 2.381601  |
| C | -7.130610 | -0.963601 | 0.814535  | H | 8.179058   | -0.587917 | 3.471966  |
| C | -6.014326 | 0.117125  | 0.610800  | H | -7.345891  | -2.964268 | -0.230983 |
| C | -6.823515 | 1.367461  | 0.182807  | H | -5.498094  | 0.353415  | 1.544302  |
| C | -8.008566 | 0.700363  | -0.547007 | H | -7.644224  | 0.250074  | -1.484645 |
| C | 7.301641  | 0.092718  | -2.330066 | H | -3.922280  | -2.924377 | -1.534292 |
| C | 8.465943  | -0.816489 | 2.440204  | H | -5.496094  | -3.623525 | -1.982520 |
| C | 6.781310  | 2.475418  | -0.088943 | H | -4.884916  | -2.166912 | -2.795318 |
| C | -4.951684 | -2.687079 | -1.829891 | H | -8.974124  | 2.321325  | -1.585960 |
| C | -7.351719 | -1.423397 | 2.249001  | H | -10.045179 | 0.959963  | -1.196322 |
| C | -6.077774 | 2.431337  | -0.603679 | H | -9.538368  | 2.091542  | 0.079775  |
| C | -9.216807 | 1.571090  | -0.826025 | H | -7.546461  | -0.568317 | 2.905333  |
| O | 6.219964  | -2.314205 | -0.947867 | H | -8.207834  | -2.103999 | 2.304363  |
| O | 6.000424  | -1.071102 | 0.935565  | H | -6.466004  | -1.948763 | 2.620610  |
| O | -8.370432 | -0.336785 | 0.375022  | H | -6.717927  | 3.310872  | -0.718824 |
| O | 9.515400  | -0.072593 | -0.383147 | H | -5.172119  | 2.737734  | -0.070704 |
| O | -7.312579 | 2.011954  | 1.366438  | H | -5.793196  | 2.078777  | -1.599103 |
| H | -3.529809 | -1.160479 | 1.046772  | H | -7.983081  | 1.407985  | 1.731076  |
| H | -2.622785 | 0.486923  | -1.380306 | - | -          | -         | -         |

**Table S41.** Atomic coordinates (Å) of cpd-6A-4 obtained at the B3LYP/6-31G(d) level of theory in the gas phase.

|   |           |           |           |   |           |           |           |
|---|-----------|-----------|-----------|---|-----------|-----------|-----------|
| C | -5.967324 | -0.313759 | 1.299225  | H | 4.976371  | 0.295698  | -1.355506 |
| C | -6.631482 | 0.695206  | 0.345183  | H | 1.004700  | 0.970618  | 0.920542  |
| C | -8.130218 | 0.310758  | 0.471618  | H | 0.197436  | -0.009789 | -1.878213 |
| C | -8.286689 | -1.097699 | -0.131974 | H | -1.447662 | 0.808257  | 0.630586  |
| C | -6.824326 | -1.367593 | -0.518840 | H | -2.254217 | -0.209250 | -2.155674 |
| C | -6.287582 | 0.011380  | -1.023353 | H | -3.866052 | 0.635604  | 0.358465  |
| C | -4.829351 | -0.056287 | -1.397032 | H | -4.657815 | -0.424122 | -2.410225 |
| C | -3.751430 | 0.269079  | -0.658604 | H | -6.632408 | -2.235316 | -1.148594 |
| C | -2.393350 | 0.150822  | -1.135835 | H | -6.974621 | -0.049174 | -3.090684 |
| C | -1.302524 | 0.455010  | -0.390818 | H | -8.113599 | 0.779160  | -2.013825 |
| C | 0.053741  | 0.337983  | -0.854501 | H | -6.610424 | 1.571230  | -2.485589 |
| C | 1.145547  | 0.627023  | -0.104670 | H | -8.902229 | -1.013880 | -1.035227 |
| C | 2.505518  | 0.506135  | -0.574118 | H | -6.496134 | 2.376133  | 1.666364  |
| C | 3.596967  | 0.772275  | 0.167270  | H | -5.300343 | 2.399609  | 0.355869  |
| C | 5.012926  | 0.644921  | -0.315166 | H | -7.001273 | 2.788103  | 0.020832  |
| C | 5.769564  | 1.967670  | -0.273899 | H | -9.087259 | -3.063886 | 0.331385  |
| C | 6.867716  | 1.887906  | 0.481621  | H | -8.318511 | -2.257006 | 1.709923  |
| C | 7.084263  | 0.527262  | 1.087684  | H | -9.912378 | -1.716167 | 1.144906  |
| C | 5.863857  | -0.310595 | 0.575401  | H | 7.575010  | 2.696841  | 0.644772  |
| C | 6.545640  | -1.504546 | -0.138207 | H | 5.262865  | -0.703420 | 1.398953  |
| C | 7.834071  | -0.825282 | -0.648035 | H | 7.571303  | -0.111272 | -1.445562 |

|   |           |           |           |   |          |           |           |
|---|-----------|-----------|-----------|---|----------|-----------|-----------|
| C | -6.333602 | 2.152146  | 0.608951  | H | 5.918314 | 4.022506  | -0.909320 |
| C | -8.938567 | -2.097538 | 0.824368  | H | 5.194859 | 2.927284  | -2.106966 |
| C | -7.053512 | 0.607702  | -2.216713 | H | 4.253949 | 3.426109  | -0.708721 |
| C | 5.265555  | 3.153639  | -1.034249 | H | 8.658288 | -2.237377 | -2.049993 |
| C | 7.281484  | 0.552819  | 2.597347  | H | 9.857249 | -1.159526 | -1.305804 |
| C | 5.725390  | -2.236288 | -1.186507 | H | 9.164605 | -2.505791 | -0.371423 |
| C | 8.947992  | -1.738502 | -1.119132 | H | 6.445761 | 1.068092  | 3.081805  |
| O | -5.447520 | -0.118504 | 2.364770  | H | 7.338822 | -0.464222 | 2.999996  |
| O | -6.088056 | -1.550518 | 0.726881  | H | 8.208008 | 1.078072  | 2.852283  |
| O | 8.265521  | -0.107800 | 0.516696  | H | 6.267575 | -3.129289 | -1.510841 |
| O | -8.997520 | 0.997956  | 0.954524  | H | 4.765202 | -2.554460 | -0.768471 |
| O | 6.896691  | -2.480696 | 0.850906  | H | 5.532646 | -1.611762 | -2.063459 |
| H | 3.473671  | 1.107655  | 1.198550  | H | 7.614198 | -2.076256 | 1.369222  |
| H | 2.639504  | 0.167599  | -1.602668 | - | -        | -         | -         |

**Table S42.** Atomic coordinates (Å) of cpd-6A-5 obtained at the B3LYP/6-31G(d) level of theory in the gas phase.

|   |           |           |           |   |            |           |           |
|---|-----------|-----------|-----------|---|------------|-----------|-----------|
| C | 6.887832  | 0.806275  | -1.284888 | H | -5.897866  | 1.265823  | 1.592059  |
| C | 6.924172  | 0.704355  | 0.247598  | H | -1.424971  | -0.009317 | 2.145469  |
| C | 8.277801  | 0.002442  | 0.506876  | H | -0.398004  | 0.670232  | -0.670757 |
| C | 8.163039  | -1.418209 | -0.080063 | H | 1.018167   | -0.269102 | 1.932334  |
| C | 6.723844  | -1.358961 | -0.617003 | H | 2.059442   | 0.389945  | -0.884229 |
| C | 5.934744  | -0.518030 | 0.436971  | H | 3.439619   | -0.535400 | 1.737875  |
| C | 4.543423  | -0.198222 | -0.038724 | H | 4.457893   | 0.098476  | -1.082057 |
| C | 3.411384  | -0.240766 | 0.690767  | H | 6.277175   | -2.300411 | -0.933708 |
| C | 2.107915  | 0.086045  | 0.161590  | H | 5.465047   | -0.376645 | 2.543199  |
| C | 0.963242  | 0.036357  | 0.886474  | H | 5.392246   | -2.025979 | 1.905391  |
| C | -0.340396 | 0.360456  | 0.373249  | H | 6.952940   | -1.255901 | 2.241355  |
| C | -1.482491 | 0.301514  | 1.101553  | H | 8.225676   | -2.135937 | 0.745635  |
| C | -2.792177 | 0.621916  | 0.586032  | H | 5.684015   | 2.372311  | 0.802370  |
| C | -3.926872 | 0.553366  | 1.307789  | H | 6.840448   | 1.864793  | 2.058192  |
| C | -5.315302 | 0.818851  | 0.776048  | H | 7.409486   | 2.755224  | 0.637337  |
| C | -5.339409 | 1.737183  | -0.433877 | H | 10.239288  | -1.599186 | -0.638267 |
| C | -5.749269 | 1.094422  | -1.530463 | H | 9.177169   | -2.778262 | -1.438205 |
| C | -6.142271 | -0.337931 | -1.278859 | H | 9.186615   | -1.088900 | -1.974016 |
| C | -5.982492 | -0.503764 | 0.273175  | H | -5.847317  | 1.536966  | -2.518238 |
| C | -7.430419 | -0.820534 | 0.736680  | H | -5.360519  | -1.362988 | 0.530713  |
| C | -8.257855 | -0.124348 | -0.363504 | H | -8.175049  | 0.966786  | -0.235039 |
| C | 6.697000  | 2.001744  | 0.982440  | H | -4.985230  | 3.686083  | -1.284769 |
| C | 9.257503  | -1.740117 | -1.099424 | H | -5.577167  | 3.704960  | 0.389175  |
| C | 5.945272  | -1.082023 | 1.859242  | H | -3.905794  | 3.261432  | 0.063061  |
| C | -4.929156 | 3.172649  | -0.320301 | H | -10.155763 | -0.086086 | -1.379184 |
| C | -5.386249 | -1.345914 | -2.131684 | H | -9.818784  | -1.610606 | -0.525799 |

|   |           |           |           |   |            |           |           |
|---|-----------|-----------|-----------|---|------------|-----------|-----------|
| C | -7.797527 | -0.440934 | 2.159951  | H | -10.275507 | -0.162482 | 0.390317  |
| C | -9.715145 | -0.523659 | -0.478492 | H | -5.680115  | -2.368775 | -1.871807 |
| O | 6.966996  | 1.779433  | -1.982744 | H | -5.598144  | -1.185908 | -3.194166 |
| O | 6.745685  | -0.467479 | -1.774292 | H | -4.308481  | -1.243448 | -1.970140 |
| O | -7.558668 | -0.521870 | -1.550516 | H | -8.788538  | -0.839855 | 2.395590  |
| O | 9.232348  | 0.484682  | 1.068271  | H | -7.084197  | -0.869530 | 2.871522  |
| O | -7.624677 | -2.237593 | 0.635981  | H | -7.820995  | 0.643986  | 2.297666  |
| H | -3.868821 | 0.228481  | 2.347155  | H | -7.600466  | -2.434774 | -0.316890 |
| H | -2.847829 | 0.931630  | -0.457652 | - | -          | -         | -         |
